# Supplementary material for: Visible light-induced intramolecular dearomative cyclization of α-bromo-N-benzyl-alkylamides: efficient construction of 2-azaspiro[4.5]decanes
Source: Royal Society of Chemistry journal article supplement (doi:10.1039/c5cc09726f), 2016-01-01

## Supporting information

# Visible Light-Induced Intramolecular Dearomative Cyclization of $\alpha$ - Bromo-*N*-benzyl-alkylamide for the Synthesis of 2- Azaspiro[4.5]decanes

Bei Hu,<sup>a</sup> Yuyuan Li,<sup>b</sup> Wuheng Dong,<sup>a</sup> Kai Ren,<sup>a</sup> Xiaomin Xie,<sup>a</sup> Jun Wan<sup>b</sup> and Zhaoguo Zhang<sup>\*a,c</sup>

<sup>a</sup>School of Chemistry and Chemical Engineering, Shanghai Jiao Tong University, 800 Dongchuan Road, Shanghai 200240, China

<sup>b</sup>College of Chemistry and Molecular Engineering and College of Environment and Safety Engineering, Qingdao University of Science and Technology Qingdao 266042, China

<sup>c</sup>Shanghai institute of organic chemistry, Chinese Academy of Sciences, 345 Lingling road, Shanghai 200032, China

## Content

|                                                                                                                                                                |    |
|----------------------------------------------------------------------------------------------------------------------------------------------------------------|----|
| 1. General Information.....                                                                                                                                    | 2  |
| 2. Preparation of substrates.....                                                                                                                              | 2  |
| 2.1 Representative procedure for the preparation of 2-bromo- <i>N</i> -( <i>tert</i> -butyl)- <i>N</i> -(4-methoxybenzyl)-2-methylpropanamide.....             | 2  |
| 2.2 The preparation of 2-bromo- <i>N</i> -( <i>tert</i> -butyl)- <i>N</i> -(4-hydroxybenzyl)-2-methylpropanamide ( <b>1p</b> ).....                            | 3  |
| 3. A general procedure for <i>fac</i> -Ir(ppy) <sub>3</sub> -catalyzed intramolecular dearomative cyclization under visible light.....                         | 3  |
| 4. The <i>fac</i> -Ir(ppy) <sub>3</sub> -catalyzed intramolecular dearomative cyclization in <b>1g</b> or <b>1j</b> and control experiments of <b>1a</b> ..... | 4  |
| 5. Spectral data for substrates and products.....                                                                                                              | 4  |
| 6. References.....                                                                                                                                             | 14 |
| 7. NMR spectra of the products.....                                                                                                                            | 15 |

## 1. General Information

Unless otherwise noted, all reactions were carried out under an atmosphere of nitrogen using standard Schlenk techniques. Materials were purchased from commercial source and were used without further purification. Anhydrous DMF, DMA, NMP, DCE, CH<sub>3</sub>CN, DCM were freshly distilled from calcium hydride, <sup>1</sup>H NMR and <sup>13</sup>C NMR spectra were recorded on a 400 MHz spectrometer. The chemical shifts for <sup>1</sup>H NMR were recorded in ppm downfield from tetramethylsilane (TMS) with the solvent resonance as the internal standard. The chemical shifts for <sup>13</sup>C NMR were recorded in ppm downfield using the central peak of deuteriochloroform (77.00 ppm) as the internal standard. Coupling constants (*J*) are reported in Hz and refer to apparent peak multiplications. HRMS were performed under ESI ionization technique on a Q-TOF Premier Mass Spectrometer. Flash column chromatography was performed on silica gel (300-400 mesh).

## 2. Preparation of substrates

### 2.1 Representative procedure for the preparation of 2-bromo-*N*-(*tert*-butyl)-*N*-(4-methoxybenzyl)-2-methylpropanamide. (1a-1o, 1q-1s)<sup>1</sup>

To a solution of 4-methoxybenzaldehyde (10.0 mmol) in ethanol (20 mL), *tert*-butylamine (15 mmol) was added at room temperature. After 4 h, NaBH<sub>4</sub> (6 mmol) was added at 0 °C and stirred for 2-3 h. After completion, the reaction was quenched with H<sub>2</sub>O (5 mL) and the solvent was evaporated after filtered over a celite pad. The resulting residue was dissolved in EtOAc (25 mL) and washed with water (2 x 20 mL), dried over Na<sub>2</sub>SO<sub>4</sub> and concentrated under reduced pressure to afford the corresponding secondary amine, which was used to the next reaction without further purification.

To a solution of the crude amine in dichloromethane (20 mL) and <sup>t</sup>Pr<sub>2</sub>NEt (12 mmol), 2-bromo-2-methylpropionyl bromide (12 mmol) was added dropwise slowly at 0 °C.

After completion, the reaction was quenched with H<sub>2</sub>O (20 mL) and extracted with DCM (3 x 25 mL). The combined organic extracts were dried over Na<sub>2</sub>SO<sub>4</sub> and the solvent was removed under reduced pressure. The crude product was purified by silica-gel column chromatography to give 2-bromo-*N*-(*tert*-butyl)-*N*-(4-methoxybenzyl)-2-methylpropanamide (**1a**) as a white solid (2.9 g, 86% yield, mp: 97 - 100 °C). <sup>1</sup>H NMR (400 MHz, CDCl<sub>3</sub>) δ 7.15 (d, *J* = 8.8, 2H), 6.89 – 6.86 (m, 2H), 4.97 (s, 2H), 3.80 (s, 3H), 1.93 (s, 6H), 1.37 (s, 9H) <sup>13</sup>C NMR (100 MHz, CDCl<sub>3</sub>) δ 171.4, 158.5, 131.8, 127.4, 113.8, 60.5, 59.7, 55.2, 50.1, 33.6, 28.4.

## 2.2 The preparation of 2-bromo-*N*-(*tert*-butyl)-*N*-(4-hydroxybenzyl)-2-methylpropanamide (**1p**)<sup>2</sup>

A mixture of TBS-protected 2-bromo-*N*-(*tert*-butyl)-*N*-(4-((*tert*-butyldimethylsilyloxy)benzyl)-2-methylpropanamide **1o** (1 mmol) and K<sub>3</sub>PO<sub>4</sub> (0.25 mmol) in DMF-H<sub>2</sub>O (2 mL, 10:1, V/V) was stirred at room temperature until the substrate finished as indicated by TLC. Then, the reaction mixture was diluted with brine (10 mL), extracted with EtOAc (3 x 5 mL), and dried over anhydrous Na<sub>2</sub>SO<sub>4</sub>. The solvent was removed in a vacuum and was purified by flash column chromatography over silica gel using ethyl hexane:acetate (5:1) as eluent. Finally, the desired product **1p** was obtained with 70% yield. <sup>1</sup>H NMR (400 MHz, DMSO) δ 9.29 (s, 1H), 7.04 (d, *J* = 8.4, 2H), 6.72 (d, *J* = 8.4, 2H), 4.87 (s, 2H), 1.84 (s, 6H), 1.27 (s, 9H). <sup>13</sup>C NMR (100 MHz, DMSO) δ 174.7, 160.5, 134.3, 131.8, 131.5, 119.6, 66.2, 63.4, 53.9, 37.8, 32.3.

## 3. A general procedure for *fac*-Ir(ppy)<sub>3</sub>-catalyzed intramolecular dearomative cyclization under visible light

A dried Schlenk tube equipped with a stirrer bar which was evacuated and backfilled with nitrogen was added substrate **1** (0.5 mmol), *fac*-Ir(ppy)<sub>3</sub> (0.005 mmol) and Li<sub>2</sub>CO<sub>3</sub> (0.5 mmol). Then 2 mL of DMA was added into the reaction tube via a syringe. The reaction mixture was

degassed by the freeze-pump-thaw method and then irradiated with a 7W blue LED in N<sub>2</sub> atmosphere (distance app. 5 cm) for 48 h. After the completion of the reaction, it was quenched by water and extracted with DCM (3 x 15 mL). The organic layers were combined and the pure product was obtained by flash column chromatography on silica gel.

#### 4. The *fac*-Ir(ppy)<sub>3</sub>-catalyzed intramolecular dearomative cyclization in **1g** or **1j** and control experiments of **1a**

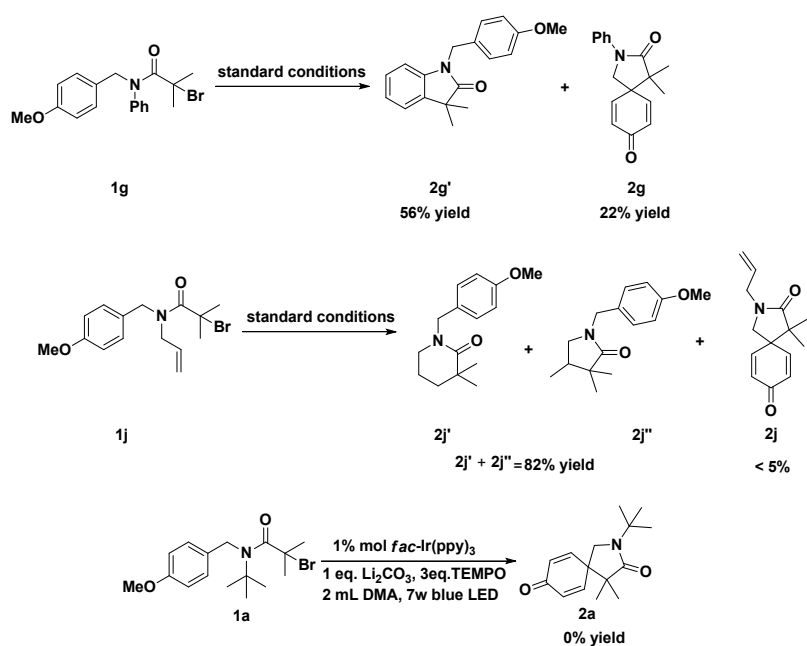

Intramolecular dearomative cyclization in **1g** or **1j** and radical inhibition experiments of **1a**

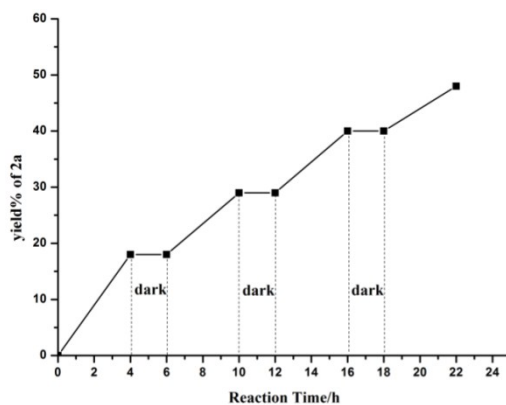

The experiment of turn on/off the light of **1a**

## 5. Spectral data for substrates and products

### 5.1 Spectral data for substrates.

#### 2-Bromo-*N*-(*tert*-butyl)-*N*-(4-methoxybenzyl)-2-methylpropanamide

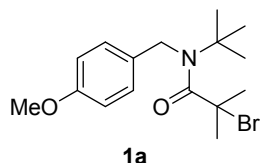

White solid, 86% yield, mp: 97 - 100 °C. <sup>1</sup>H NMR (400 MHz, CDCl<sub>3</sub>) δ 7.15 (d, *J* = 8.8, 2H), 6.89 – 6.86 (m, 2H), 4.97 (s, 2H), 3.80 (s, 3H), 1.93 (s, 6H), 1.37 (s, 9H). <sup>13</sup>C NMR (100 MHz, CDCl<sub>3</sub>) δ 171.4, 158.5, 131.8, 127.4, 113.8, 60.5, 59.7, 55.2, 50.1, 33.6, 28.4. HRMS-ESI (*m/z*): Calculated for C<sub>16</sub>H<sub>25</sub><sup>79</sup>BrNO<sub>2</sub> (M + H)<sup>+</sup>: 342.1069, Found: 342.1073.

#### 2-Bromo-*N*-methyl-*N*-(4-methoxybenzyl)-2-methylpropanamide

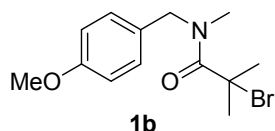

Pale yellow liquid, 56% yield. <sup>1</sup>H NMR (400 MHz, CDCl<sub>3</sub>) δ 7.16 (d, *J* = 8.0, 2H), 6.87 (d, *J* = 8.4, 2H), 4.67 (s, 2H), 3.80 (s, 3H), 3.12 (s, 3H), 2.01 (s, 6H). <sup>13</sup>C NMR (100 MHz, CDCl<sub>3</sub>) δ 170.4, 158.9, 128.6, 114.0, 57.0, 55.2, 53.2, 36.6, 32.6. HRMS-ESI (*m/z*): Calculated for C<sub>13</sub>H<sub>18</sub><sup>79</sup>BrNO<sub>2</sub>Na (M + Na)<sup>+</sup>: 322.0419, Found: 322.0428.

#### 2-Bromo-*N*-isopropyl-*N*-(4-methoxybenzyl)-2-methylpropanamide

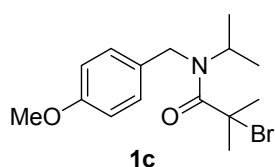

Pale yellow liquid, 62% yield. <sup>1</sup>H NMR (400 MHz, CDCl<sub>3</sub>) δ 7.13 (d, *J* = 7.6, 2H), 6.83 (d, *J* = 8.4, 2H), 4.99 (s, 1H), 4.43 (s, 2H), 3.78 (s, 3H), 2.00 (s, 6H), 1.24 (d, *J* = 6.4, 6H). <sup>13</sup>C NMR (100 MHz, CDCl<sub>3</sub>) δ 170.1, 158.2, 131.0, 127.4, 113.7, 57.6, 55.1, 49.7, 44.8, 32.9, 20.7. HRMS-ESI (*m/z*): Calculated for C<sub>15</sub>H<sub>23</sub><sup>79</sup>BrNO<sub>2</sub> (M + H)<sup>+</sup>: 328.0912, Found: 328.0917.

#### 2-Bromo-*N*-butyl-*N*-(4-methoxybenzyl)-2-methylpropanamide

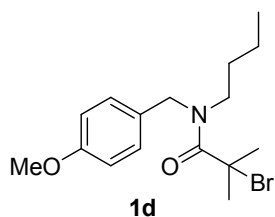

Pale yellow liquid, 95% yield. <sup>1</sup>H NMR (400 MHz, CDCl<sub>3</sub>) δ 7.15 – 7.12 (m, 2H), 6.87 – 6.85 (m, 2H), 4.91 – 4.57 (m, 2H), 3.78 (s, 3H), 3.59 – 3.22 (m, 2H), 1.97 (s, 6H), 1.52 (s, 2H), 1.27 – 1.26 (m, 2H), 0.89 (t, *J* = 6.4, 3H). <sup>13</sup>C NMR (100 MHz, CDCl<sub>3</sub>) δ 170.2, 128.2, 114.0,

57.3, 55.1, 51.9, 48.2, 47.8, 46.7, 32.86, 29.6, 28.9, 28.4, 20.0, 13.8. HRMS-ESI (m/z): Calculated for C<sub>16</sub>H<sub>25</sub><sup>79</sup>BrNO<sub>2</sub> (M + H)<sup>+</sup>: 342.1069, Found: 342.1070.

**2-Bromo-N-cyclohexyl-N-(4-methoxybenzyl)-2-methylpropanamide**

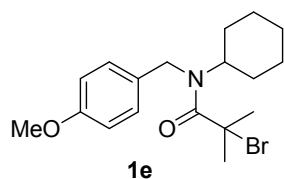

Pale yellow liquid, 84% yield. <sup>1</sup>H NMR (400 MHz, CDCl<sub>3</sub>) δ 7.12 (d, *J* = 8.0, 2H), 6.82 (d, *J* = 8.4, 2H), 4.46 (s, 3H), 3.78 (s, 3H), 2.00 (s, 6H), 1.81 (t, *J* = 14.8, 4H), 1.68 – 1.64 (m, 2H), 1.54 – 1.45 (m, 2H), 1.37 – 1.33 (m, 1H), 1.12 – 1.05 (m, 1H). <sup>13</sup>C NMR (100 MHz, CDCl<sub>3</sub>) δ 170.2, 158.1, 131.1, 127.4, 113.6, 58.2, 57.7, 55.1, 45.9, 32.9, 31.4, 25.8, 25.2. HRMS-ESI (m/z): Calculated for C<sub>18</sub>H<sub>27</sub><sup>79</sup>BrNO<sub>2</sub> (M + H)<sup>+</sup>: 368.1225, Found: 368.1230.

**2-Bromo-N-(4-methoxybenzyl)-2-methylpropanamide**

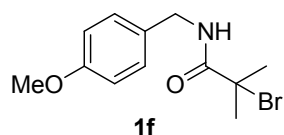

White solid, 80% yield, mp: 47 - 49 °C. <sup>1</sup>H NMR (400 MHz, CDCl<sub>3</sub>) δ 7.23 – 7.20 (m, 2H), 6.89 (s, 1H), 6.90 – 6.86 (m, 2H), 4.39 (d, *J* = 5.6, 2H), 3.80 (s, 3H), 1.98 (s, 6H). <sup>13</sup>C NMR (100 MHz, CDCl<sub>3</sub>) δ 171.8, 159.1, 129.8, 128.9, 114.2, 62.9, 55.3, 43.9, 32.7. HRMS-ESI (m/z): Calculated for C<sub>12</sub>H<sub>16</sub><sup>79</sup>BrNO<sub>2</sub>Na (M + Na)<sup>+</sup>: 308.0262, Found: 308.0266.

**2-Bromo-N-(4-methoxybenzyl)-2-methyl-N-phenylpropanamide**

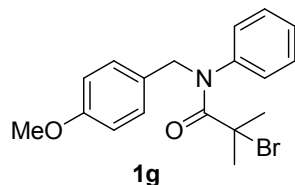

Pale yellow liquid, 77% yield. <sup>1</sup>H NMR (400 MHz, CDCl<sub>3</sub>) δ 7.35 – 7.26 (m, 3H), 7.18 – 7.06 (m, 4H), 6.82 – 6.75 (m, 2H), 4.83 (s, 2H), 3.78 (s, 3H), 1.71 (s, 6H). <sup>13</sup>C NMR (100 MHz, CDCl<sub>3</sub>) δ 169.8, 158.8, 142.0, 130.2, 129.9, 129.0, 128.6, 128.1, 113.5, 58.4, 56.2, 55.0, 33.3. HRMS-ESI (m/z): Calculated for C<sub>18</sub>H<sub>21</sub><sup>79</sup>BrNO<sub>2</sub> (M + H)<sup>+</sup>: 362.0756, Found: 362.0750.

**N-Benzyl-2-bromo-N-(4-methoxybenzyl)-2-methylpropanamide**

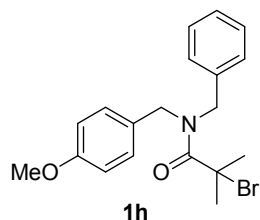

Pale yellow liquid, 79% yield. <sup>1</sup>H NMR (400 MHz, CDCl<sub>3</sub>) δ 7.40 – 7.27 (m, 3H), 7.23 – 7.07 (m, 4H), 6.88 (s, 2H), 4.90 (s, 2H), 4.53 (s, 2H), 3.81 (s, 3H), 2.03 (s, 6H). <sup>13</sup>C NMR (100 MHz, CDCl<sub>3</sub>) δ 170.7, 158.8, 136.3, 128.5, 127.2, 114.0, 57.1, 55.1, 51.2, 48.5, 32.9. HRMS-ESI (m/z): Calculated for C<sub>19</sub>H<sub>23</sub><sup>79</sup>BrNO<sub>2</sub> (M + H)<sup>+</sup>: 376.0912, Found: 376.0913.

**Methyl 2-(2-bromo-N-(4-methoxybenzyl)-2-methylpropanamido)acetate**

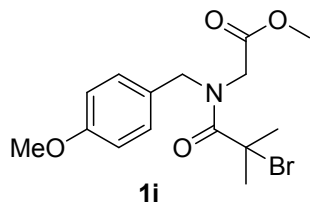

Colorless liquid, 88% yield.  $^1\text{H NMR}$  (400 MHz,  $\text{CDCl}_3$ )  $\delta$  7.20 (s, 2H), 6.88 (d,  $J = 8.4$ , 2H), 5.04 (s, 2H), 3.87 (s, 2H), 3.80 (s, 3H), 3.71 (s, 3H), 2.03 (s, 6H).  $^{13}\text{C NMR}$  (100 MHz,  $\text{CDCl}_3$ )  $\delta$  169.5, 159.2, 129.0, 128.5, 127.4, 114.1, 56.1, 55.2, 53.2, 52.0, 47.8, 32.5.

HRMS-ESI (m/z): Calculated for  $\text{C}_{15}\text{H}_{20}^{79}\text{BrNO}_4 \text{Na}$  ( $\text{M} + \text{Na}$ ) $^+$ : 380.0473, Found: 380.0474.

***N*-Allyl-2-bromo-*N*-(4-methoxybenzyl)-2-methylpropanamide**

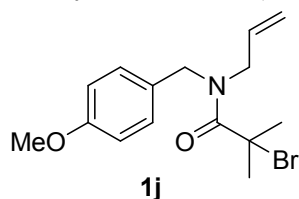

Colorless liquid, 80% yield.  $^1\text{H NMR}$  (400 MHz,  $\text{CDCl}_3$ )  $\delta$  7.15 (d,  $J = 8.4$ , 2H), 6.87 (d,  $J = 8.4$ , 2H), 5.79 (s, 1H), 5.18 (s, 2H), 4.96 – 4.18 (m, 4H), 3.80 (s, 3H), 2.00 (s, 6H).  $^{13}\text{C NMR}$  (100 MHz,  $\text{CDCl}_3$ )  $\delta$  170.2, 158.6, 132.6, 128.5, 117.7, 113.8, 56.9, 54.9, 50.2, 47.9, 32.6, 30.5. HRMS-ESI (m/z): Calculated for  $\text{C}_{15}\text{H}_{20}^{79}\text{BrNO}_2\text{Na}$  ( $\text{M} + \text{Na}$ ) $^+$ : 348.0575, Found: 348.0578.

**2-Bromo-*N*-(*tert*-butyl)-*N*-(4-methoxybenzyl)propanamide**

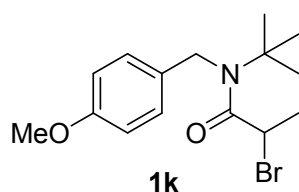

Pale yellow liquid, 73% yield.  $^1\text{H NMR}$  (400 MHz,  $\text{CDCl}_3$ )  $\delta$  7.07 (d,  $J = 8.4$ , 2H), 6.91 (d,  $J = 8.4$ , 2H), 4.71 (d,  $J = 18.8$ , 1H), 4.57 (d,  $J = 18.8$ , 1H), 4.31 (q,  $J = 6.4$ , 1H), 3.81 (s, 3H), 1.75 (d,  $J = 6.4$ , 3H), 1.45 (s, 9H).  $^{13}\text{C NMR}$  (100 MHz,  $\text{CDCl}_3$ )  $\delta$  170.4, 158.7, 130.8, 126.2, 114.3, 58.4, 55.2, 48.0, 41.9, 28.2, 22.0. HRMS-ESI (m/z): Calculated for  $\text{C}_{15}\text{H}_{22}^{79}\text{BrNO}_2\text{Na}$  ( $\text{M} + \text{Na}$ ) $^+$ : 350.0732, Found: 350.0731.

**2-Bromo-*N*-(*tert*-butyl)-*N*-(4-methoxybenzyl)acetamide**

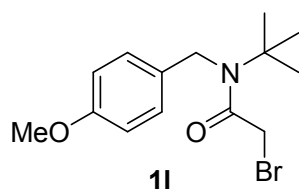

Pale yellow liquid, 89% yield.  $^1\text{H NMR}$  (400 MHz,  $\text{CDCl}_3$ )  $\delta$  7.11 (d,  $J = 8.8$ , 2H), 6.94 – 6.86 (m, 2H), 4.61 (s, 2H), 3.81 (s, 3H), 3.75 (s, 2H), 1.44 (s, 9H).  $^{13}\text{C NMR}$  (100 MHz,  $\text{CDCl}_3$ )  $\delta$  167.8, 158.8, 130.4, 126.4, 114.4, 58.5, 55.3, 48.8, 30.0, 28.3. HRMS-ESI (m/z): Calculated for  $\text{C}_{14}\text{H}_{20}^{79}\text{BrNO}_2\text{Na}$  ( $\text{M} + \text{Na}$ ) $^+$ : 336.0575, Found: 336.0561.

***N*-(4-(Benzyloxy)benzyl)-2-bromo-*N*-(*tert*-butyl)-2-methylpropanamide**

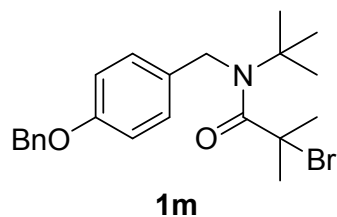

Pale yellow liquid, 85% yield.  $^1\text{H NMR}$  (400 MHz,  $\text{CDCl}_3$ )  $\delta$  7.47 – 7.30 (m, 5H), 7.15 (d,  $J$  = 8.4, 2H), 6.99 – 6.92 (m, 2H), 5.05 (s, 2H), 1.93 (s, 6H), 1.38 (s, 9H).  $^{13}\text{C NMR}$  (100 MHz,  $\text{CDCl}_3$ )  $\delta$  171.4, 157.8, 136.8, 132.1, 128.5, 127.9, 127.4, 114.7, 70.0, 60.4, 59.6, 50.1, 33.6, 28.3. HRMS-ESI ( $m/z$ ): Calculated for  $\text{C}_{22}\text{H}_{28}^{79}\text{BrNO}_2\text{Na}$  ( $\text{M} + \text{Na}$ ) $^+$ : 440.1201, Found: 440.1212.

**2-Bromo-N-(tert-butyl)-2-methyl-N-(4-((tetrahydro-2H-pyran-2-yl)oxy)benzyl)propanamide**

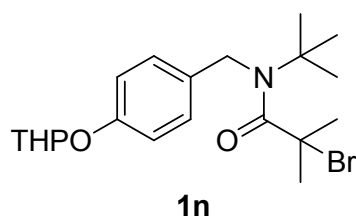

White solid, 70% yield, mp: 145 - 149 °C.  $^1\text{H NMR}$  (400 MHz,  $\text{CDCl}_3$ )  $\delta$  7.13 (d,  $J$  = 8.8, 2H), 7.05 – 6.97 (m, 2H), 5.38 (t,  $J$  = 3.6, 1H), 4.98 (s, 2H), 3.98 – 3.89 (m, 1H), 3.67 – 3.57 (m, 1H), 2.03 – 1.96 (m, 2H), 1.92 (s, 6H), 1.88 – 1.83 (m, 2H), 1.72 – 1.64 (m, 2H), 1.37 (s, 9H).  $^{13}\text{C NMR}$  (100 MHz,  $\text{CDCl}_3$ )  $\delta$  171.4, 156.0, 132.8, 127.3, 116.4, 96.6, 62.2, 60.6, 59.7, 50.2, 33.7, 30.4, 29.7, 28.4, 25.2, 18.9. HRMS-ESI ( $m/z$ ): Calculated for  $\text{C}_{20}\text{H}_{31}^{79}\text{BrNO}_3$  ( $\text{M} + \text{H}$ ) $^+$ : 412.1487, Found: 412.1486.

**2-Bromo-N-(tert-butyl)-N-(4-((tert-butyldimethylsilyl)oxy)benzyl)-2-methylpropanamide**

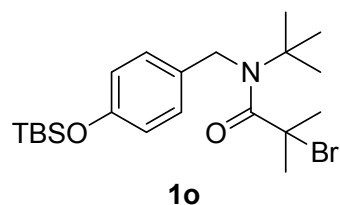

White solid, 81% yield, mp: 79 - 82 °C.  $^1\text{H NMR}$  (400 MHz,  $\text{CDCl}_3$ )  $\delta$  7.08 (d,  $J$  = 8.4, 2H), 6.83 – 6.78 (m, 2H), 4.96 (s, 2H), 1.93 (s, 6H), 1.36 (s, 9H), 0.98 (s, 9H), 0.19 (s, 6H).  $^{13}\text{C NMR}$  (100 MHz,  $\text{CDCl}_3$ )  $\delta$  171.5, 154.5, 132.5, 127.4, 119.9, 60.6, 59.7, 50.2, 33.7, 28.4, 25.6, 18.2, -4.4. HRMS-ESI ( $m/z$ ): Calculated for  $\text{C}_{21}\text{H}_{37}^{79}\text{BrNO}_2\text{Si}$  ( $\text{M} + \text{H}$ ) $^+$ : 442.1777, Found: 442.1486.

**2-Bromo-N-(tert-butyl)-N-(4-hydroxybenzyl)-2-methylpropanamide**

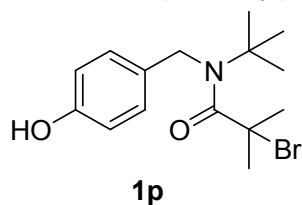

White solid, 70% yield, mp: 149 - 150 °C.  $^1\text{H NMR}$  (400 MHz, DMSO)  $\delta$  9.29 (s, 1H), 7.04



(d,  $J = 8.4$ , 2H), 6.72 (d,  $J = 8.4$ , 2H), 4.87 (s, 2H), 1.84 (s, 6H), 1.27 (s, 9H).  $^{13}\text{C}$  NMR (100 MHz, DMSO)  $\delta$  174.7, 160.5, 134.3, 131.8, 131.5, 119.6, 66.2, 63.4, 53.9, 37.8, 32.3. HRMS-ESI ( $m/z$ ): Calculated for  $\text{C}_{15}\text{H}_{23}^{79}\text{BrNO}_2$  ( $M + \text{H}$ ) $^+$ : 328.0912, Found: 328.0922.

**2-Bromo-*N*-(*tert*-butyl)-*N*-(2,4-dimethoxybenzyl)-2-methylpropanamide**

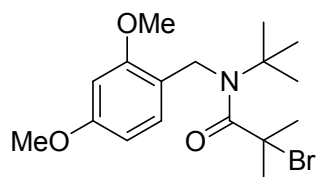

**1q**

White solid, 65% yield, mp: 106 - 112 °C.  $^1\text{H}$  NMR (400 MHz,  $\text{CDCl}_3$ )  $\delta$  7.10 (d,  $J = 8.4$ , 1H), 6.52 – 6.38 (m, 2H), 4.91 (s, 2H), 3.83 (s, 3H), 3.80 (s, 3H), 1.89 (s, 6H), 1.38 (s, 9H).  $^{13}\text{C}$  NMR (100 MHz,  $\text{CDCl}_3$ )  $\delta$  171.6, 159.7, 156.7, 128.1, 120.6, 103.6, 98.2, 60.7, 59.6, 55.3, 45.0, 33.6, 28.1. HRMS-ESI ( $m/z$ ): Calculated for  $\text{C}_{17}\text{H}_{27}^{79}\text{BrNO}_3$  ( $M + \text{H}$ ) $^+$ : 372.1174, Found: 372,1165.

**2-Bromo-*N*-(3-bromo-4-methoxybenzyl)-*N*-(*tert*-butyl)-2-methylpropanamide**

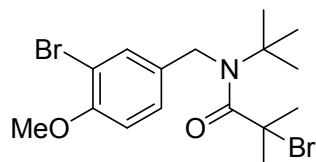

**1r**

White solid, 82% yield, mp: 119 - 122 °C.  $^1\text{H}$  NMR (400 MHz,  $\text{CDCl}_3$ )  $\delta$  7.40 (d,  $J = 1.6$ , 1H), 7.15 (dd,  $J = 8.4$ , 1.6, 1H), 6.87 (d,  $J = 8.4$ , 1H), 4.99 – 4.93 (m, 2H), 3.89 (s, 3H), 1.92 (s, 6H), 1.37 (s, 9H).  $^{13}\text{C}$  NMR (100 MHz,  $\text{CDCl}_3$ )  $\delta$  171.3, 154.8, 133.5, 132.6, 131.1, 127.8, 126.4, 111.8, 60.21, 59.8, 56.2, 49.6, 43.2, 33.6, 32.5, 28.4. HRMS-ESI ( $m/z$ ): Calculated for  $\text{C}_{16}\text{H}_{24}\text{Br}_2\text{NO}_2$  ( $M + \text{H}$ ) $^+$ : 422.0153 ( $^{81}\text{Br}$ ), 420.0174 ( $^{79}\text{Br}$ ) Found: 420.0183 ( $^{79}\text{Br}$ ), 422.0170 ( $^{81}\text{Br}$ ).

**2-Bromo-*N*-(*tert*-butyl)-*N*-((4-methoxynaphthalen-1-yl)methyl)-2-methylpropanamide**

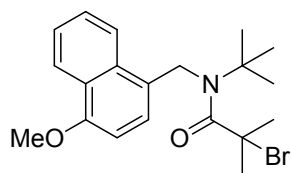

**1s**

Pale yellow solid, 82% yield, mp: 138 - 140 °C.  $^1\text{H}$  NMR (400 MHz,  $\text{CDCl}_3$ )  $\delta$  8.35 (d,  $J = 8.4$ , 1H), 7.92 (d,  $J = 8.2$ , 1H), 7.62 – 7.51 (m, 2H), 7.34 (d,  $J = 8.0$ , 1H), 6.80 (d,  $J = 8.0$ , 1H), 4.01 (s, 3H), 1.82 (s, 6H), 1.47 (s, 9H).  $^{13}\text{C}$  NMR (100 MHz,  $\text{CDCl}_3$ )  $\delta$  171.4, 154.7, 130.5, 126.9, 125.8, 125.2, 124.1, 123.0, 121.6, 102.8, 61.1, 59.9, 55.4, 47.7, 28.1. HRMS-ESI ( $m/z$ ): Calculated for  $\text{C}_{20}\text{H}_{27}^{79}\text{BrNO}_2$  ( $M + \text{H}$ ) $^+$ : 392.1225, Found: 392.1227.

**5.1 Spectral data for products**

**2-(*tert*-Butyl)-4,4-dimethyl-2-azaspiro[4.5]deca-6,9-diene-3,8-dione**

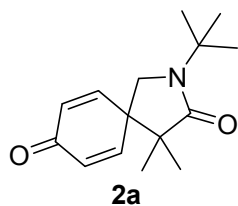

White solid, 85% yield, mp: 108 - 112 °C. <sup>1</sup>H NMR (400 MHz, CDCl<sub>3</sub>) δ 6.91 – 6.87 (m, 2H), 6.40 – 6.36 (m, 2H), 3.39 (s, 2H), 1.42 (s, 9H), 1.05 (s, 6H). <sup>13</sup>C NMR (100 MHz, CDCl<sub>3</sub>) δ 185.0, 177.1, 148.9, 130.7, 54.2, 50.1, 49.5, 47.5, 27.5, 20.4. HRMS-ESI (m/z): Calculated for C<sub>15</sub>H<sub>22</sub>NO<sub>2</sub> (M + H)<sup>+</sup>: 248.1651, Found: 248.1654.

**2,4,4-Trimethyl-2-azaspiro[4.5]deca-6,9-diene-3,8-dione**

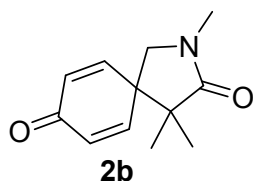

Pale yellow liquid, 85% yield. <sup>1</sup>H NMR (400 MHz, CDCl<sub>3</sub>) δ 6.88 (d, *J* = 10.4, 2H), 6.39 (d, *J* = 10.4, 2H), 3.35 (s, 2H), 2.93 (s, 3H), 1.09 (s, 6H). <sup>13</sup>C NMR (100 MHz, CDCl<sub>3</sub>) δ 184.9, 177.0, 148.6, 130.6, 53.4, 49.4, 48.3, 30.0, 20.6. HRMS-ESI (m/z): Calculated for C<sub>12</sub>H<sub>16</sub>NO<sub>2</sub> (M + H)<sup>+</sup>: 206.1181, Found: 206.1182.

**2-Isopropyl-4,4-dimethyl-2-azaspiro[4.5]deca-6,9-diene-3,8-dione**

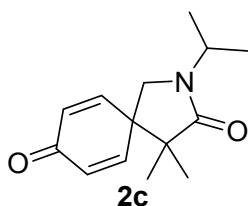

Pale yellow solid, 91% yield, mp: 102 - 107 °C. <sup>1</sup>H NMR (400 MHz, CDCl<sub>3</sub>) δ 6.89 – 6.83 (m, 2H), 6.43 – 6.34 (m, 2H), 4.48 – 4.38 (m, 1H), 3.29 (s, 2H), 1.15 (d, *J* = 7.8, 6H), 1.08 (s, 6H). <sup>13</sup>C NMR (100 MHz, CDCl<sub>3</sub>) δ 184.8, 176.0, 148.6, 130.6, 49.7, 48.0, 46.2, 42.6, 20.3, 19.3. HRMS-ESI (m/z): Calculated for C<sub>14</sub>H<sub>20</sub>NO<sub>2</sub> (M + H)<sup>+</sup>: 234.1494, Found: 234.1491.

**2-Butyl-4,4-dimethyl-2-azaspiro[4.5]deca-6,9-diene-3,8-dione**

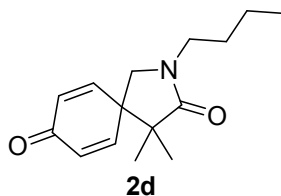

Pale yellow liquid, 73% yield. <sup>1</sup>H NMR (400 MHz, CDCl<sub>3</sub>) δ 6.88 (d, *J* = 10.2, 2H), 6.39 (d, *J* = 10.2, 2H), 3.36 – 3.33 (m, 4H), 1.55 – 1.48 (m, 2H), 1.37 – 1.30 (m, 2H), 1.09 (s, 6H), 0.94 (t, *J* = 7.2, 3H). <sup>13</sup>C NMR (100 MHz, CDCl<sub>3</sub>) δ 184.8, 176.6, 148.6, 130.5, 51.1, 49.5, 48.2, 42.3, 29.0, 20.5, 19.8, 13.5. HRMS-ESI (m/z): Calculated for C<sub>15</sub>H<sub>22</sub>NO<sub>2</sub> (M + H)<sup>+</sup>: 248.1651, Found: 248.1646.

**2-Cyclohexyl-4,4-dimethyl-2-azaspiro[4.5]deca-6,9-diene-3,8-dione**

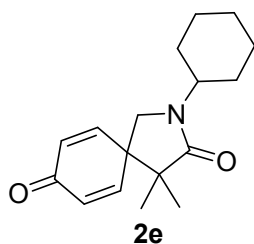

Pale yellow solid, 78% yield, mp: 101 - 110 °C. <sup>1</sup>H NMR (400 MHz, CDCl<sub>3</sub>) δ 6.86 (d, *J* = 10.2, 2H), 6.37 (d, *J* = 10.2, 2H), 4.04 – 3.95 (m, 1H), 3.30 (s, 2H), 1.87 – 1.62 (m, 7H), 1.44 – 1.31 (m, 4H), 1.07 (s, 6H). <sup>13</sup>C NMR (100 MHz, CDCl<sub>3</sub>) δ 184.8, 176.0, 148.6, 130.6, 50.5, 49.6, 48.2, 47.3, 29.9, 25.1, 20.4. HRMS-ESI (*m/z*): Calculated for C<sub>18</sub>H<sub>24</sub>NO<sub>2</sub> (*M* + H)<sup>+</sup>: 274.1807, Found: 274.1802.

**4,4-Dimethyl-2-phenyl-2-azaspiro[4.5]deca-6,9-diene-3,8-dione**

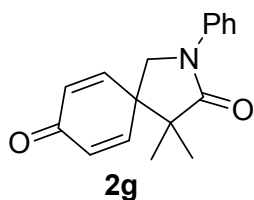

Pale yellow solid, 22% yield, mp: 105 - 110 °C. <sup>1</sup>H NMR (400 MHz, CDCl<sub>3</sub>) δ 7.62 – 7.60 (m, 2H), 7.44 – 7.36 (m, 2H), 7.22 – 7.18 (m, 1H), 7.02 – 6.94 (m, 2H), 6.51 – 6.37 (m, 2H), 3.84 (s, 2H), 1.21 (s, 6H). <sup>13</sup>C NMR (100 MHz, CDCl<sub>3</sub>) δ 184.7, 176.0, 148.0, 138.7, 131.0, 129.0, 125.0, 119.7, 52.4, 50.3, 47.7, 29.5, 20.8. HRMS-ESI (*m/z*): Calculated for C<sub>17</sub>H<sub>18</sub>NO<sub>2</sub> (*M* + H)<sup>+</sup>: 268.1333, Found: 268.1337.

**1-(4-Methoxybenzyl)-3,3-dimethylindolin-2-one**

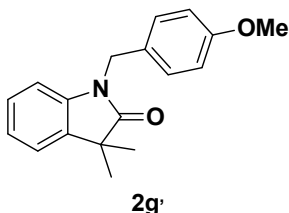

Pale yellow liquid, 56% yield. <sup>1</sup>H NMR (400 MHz, CDCl<sub>3</sub>) δ 7.22 – 7.19 (m, 3H), 7.16 – 7.12 (m, 1H), 7.02 (t, *J* = 7.2, 1H), 6.84 (d, *J* = 8.8, 2H), 6.74 (d, *J* = 7.6, 1H), 4.85 (s, 2H), 3.77 (s, 3H), 1.42 (s, 6H). <sup>13</sup>C NMR (100 MHz, CDCl<sub>3</sub>) δ 181.4, 159.0, 141.6, 135.8, 128.5, 128.2, 127.5, 122.4, 122.3, 114.12, 109, 55.2, 44.1, 43.0, 24.5. HRMS-ESI (*m/z*): Calculated for C<sub>18</sub>H<sub>19</sub>NO<sub>2</sub>Na (*M* + Na)<sup>+</sup>: 304.1313, Found: 304.1313.

**2-Benzyl-4,4-dimethyl-2-azaspiro[4.5]deca-6,9-diene-3,8-dione**

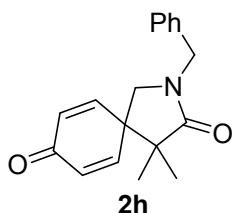

Pale yellow liquid, 87% yield. <sup>1</sup>H NMR (400 MHz, CDCl<sub>3</sub>) δ 7.39 – 7.29 (m, 3H), 7.28 – 7.24 (m, 2H), 6.82 – 6.79 (m, 2H), 6.36 – 6.33 (m, 2H), 4.52 (s, 2H), 3.20 (s, 2H), 1.12 (s, 6H). <sup>13</sup>C NMR (100 MHz, CDCl<sub>3</sub>) δ 184.8, 176.8, 148.4, 135.5, 130.6, 128.8, 128.1, 127.9, 50.6, 49.4,

48.0, 46.8, 20.5. HRMS-ESI (m/z): Calculated for C<sub>18</sub>H<sub>19</sub>NO<sub>2</sub>Na (M + Na)<sup>+</sup>: 304.1313, Found: 304.1310.

**Methyl 2-(4,4-dimethyl-3,8-dioxo-2-azaspiro[4.5]deca-6,9-dien-2-yl)acetate**

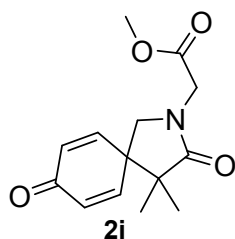

Pale yellow liquid, 89% yield. <sup>1</sup>H NMR (400 MHz, CDCl<sub>3</sub>) δ 6.99 (d, *J* = 10.4, 2H), 6.40 (d, *J* = 10.4, 2H), 4.13 (s, 2H), 3.75 (s, 3H), 3.46 (s, 2H), 1.13 (s, 6H). <sup>13</sup>C NMR (100 MHz, CDCl<sub>3</sub>) δ 184.9, 177.6, 168.8, 148.4, 130.7, 52.3, 51.6, 49.0, 48.4, 43.6, 20.6. HRMS-ESI (m/z): Calculated for C<sub>14</sub>H<sub>18</sub>NO<sub>4</sub> (M + H)<sup>+</sup>: 264.1236, Found: 264.1234.

**1-(4-Methoxybenzyl)-3,3-dimethylpiperidin-2-one**

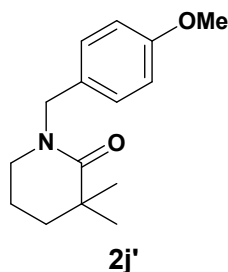

colorless liquid, **2j'**+**2j''**=82% yield. <sup>1</sup>H NMR (400 MHz, CDCl<sub>3</sub>) δ 7.15 – 7.12 (m, 2H), 6.88 – 6.81 (m, 2H), 4.46 (d, *J* = 14.4, 1H), 4.29 (d, *J* = 14.4, 1H), 3.78 (s, 3H), 3.46 (dd, *J* = 10.0, 4.8, 1H), 3.35 (dd, *J* = 10.0, 7.6, 1H), 3.22 (t, *J* = 10.4, 1H), 2.86 (dd, *J* = 10.0, 8.4, 1H), 2.44 – 2.35 (m, 1H), 1.90 (s, 1H), 1.23 (s, 3H), 0.97 (s, 3H). <sup>13</sup>C NMR (100 MHz, CDCl<sub>3</sub>) δ 178.2, 159.1, 129.4, 128.3, 114.1, 55.2, 48.7, 46.0, 44.0, 31.4, 29.6, 24.2, 18.2. HRMS-ESI (m/z): Calculated for C<sub>15</sub>H<sub>21</sub>NO<sub>2</sub>Na (M + Na)<sup>+</sup>: 270.1470, Found: 270.1457.

**1-(4-Methoxybenzyl)-3,3,4-trimethylpyrrolidin-2-one**

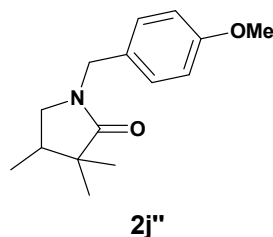

colorless liquid, **2j'**+**2j''**=82% yield. <sup>1</sup>H NMR (400 MHz, CDCl<sub>3</sub>) δ 7.13 (d, *J* = 8.4, 2H), 6.88 – 6.81 (m, 2H), 4.43 (d, *J* = 14.4, 1H), 4.30 (d, *J* = 14.4, 1H), 3.79 (s, 3H), 3.15 (dd, *J* = 9.6, 7.6, 1H), 2.70 (t, *J* = 9.2, 1H), 2.07 – 1.96 (m, 1H), 1.14 (s, 3H), 0.92 – 0.91 (m, 6H). <sup>13</sup>C NMR (100 MHz, CDCl<sub>3</sub>) δ 179.7, 159.0, 129.3, 128.9, 114.0, 55.2, 50.4, 45.9, 43.3, 38.3, 23.6, 18.2, 12.4. HRMS-ESI (m/z): Calculated for C<sub>15</sub>H<sub>21</sub>NO<sub>2</sub>Na (M + Na)<sup>+</sup>: 270.1470, Found: 270.1465.

**2-(tert-Butyl)-4-methyl-2-azaspiro[4.5]deca-6,9-diene-3,8-dione**

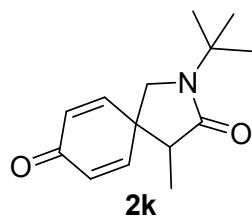

Pale yellow liquid, 80% yield.  $^1\text{H}$  NMR (400 MHz,  $\text{CDCl}_3$ )  $\delta$  6.88 – 6.85 (m, 1H), 6.82 – 6.78 (m, 1H), 6.39 (d,  $J = 10.0$ , 2H), 3.52 (d,  $J = 10.0$ , 1H), 3.31 (d,  $J = 10.0$ , 1H), 2.66 (q,  $J = 7.2$ , 14.4, 1H), 1.42 (s, 9H), 0.93 (d,  $J = 7.2$ , 3H).  $^{13}\text{C}$  NMR (100 MHz,  $\text{CDCl}_3$ )  $\delta$  185.4, 174.0, 150.1, 148.0, 131.3, 130.4, 54.5, 51.1, 47.3, 46.3, 27.6, 9.7. HRMS-ESI ( $m/z$ ): Calculated for  $\text{C}_{14}\text{H}_{20}\text{NO}_2$  ( $M + \text{H}$ ) $^+$ : 234.1494, Found: 234.1491.

**2-(tert-Butyl)-2-azaspiro[4.5]deca-6,9-diene-3,8-dione<sup>2</sup>**

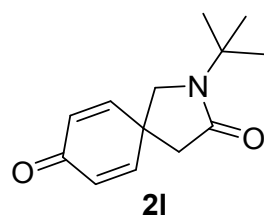

Pale yellow liquid, 84% yield.  $^1\text{H}$  NMR (400 MHz,  $\text{CDCl}_3$ )  $\delta$  6.97 – 6.89 (m, 2H), 6.34 – 6.31 (m, 2H), 3.48 (s, 2H), 2.53 (s, 2H), 1.43 (s, 9H).  $^{13}\text{C}$  NMR (100 MHz,  $\text{CDCl}_3$ )  $\delta$  184.9, 171.6, 150.0, 129.3, 54.6, 53.0, 42.5, 40.8, 27.6.

**2-(tert-Butyl)-6-methoxy-4,4-dimethyl-2-azaspiro[4.5]deca-6,9-diene-3,8-dione**

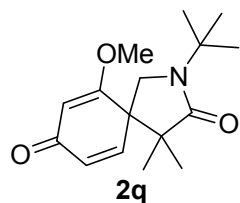

Pale yellow solid, 66% yield, mp: 132 - 134 °C.  $^1\text{H}$  NMR (400 MHz,  $\text{CDCl}_3$ )  $\delta$  6.64 (d,  $J = 10.2$ , 1H), 6.32 – 6.29 (m, 1H), 5.56 (s, 1H), 3.69 (s, 3H), 3.56 – 3.49 (m, 2H), 1.41 (s, 9H), 1.18 (s, 3H), 0.90 (s, 3H).  $^{13}\text{C}$  NMR (100 MHz,  $\text{CDCl}_3$ )  $\delta$  186.8, 177.4, 176.4, 144.6, 130.2, 102.6, 55.2, 54.1, 50.6, 49.3, 49.2, 29.6, 27.3, 23.1, 19.0. HRMS-ESI ( $m/z$ ): Calculated for  $\text{C}_{16}\text{H}_{24}\text{NO}_3$  ( $M + \text{H}$ ) $^+$ : 278.1756, Found: 278.1759.

**7-Bromo-2-(tert-butyl)-4,4-dimethyl-2-azaspiro[4.5]deca-6,9-diene-3,8-dione**

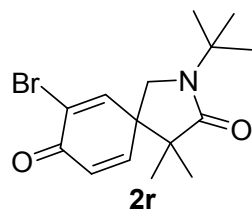

Pale yellow solid, 45% yield, mp: 90 - 94 °C.  $^1\text{H}$  NMR (400 MHz,  $\text{CDCl}_3$ )  $\delta$  7.32 (d,  $J = 2.8$ , 1H), 6.92 (dd,  $J = 10.0, 2.8$ , 1H), 6.47 (d,  $J = 10.0$ , 1H), 3.45 (d,  $J = 10.4$ , 1H), 3.41 (d,  $J = 10.4$ , 1H), 1.41 (s, 9H), 1.06 (d,  $J = 8.4$ , 6H).  $^{13}\text{C}$  NMR (100 MHz,  $\text{CDCl}_3$ )  $\delta$  177.8, 176.6, 149.2, 149.0, 129.1, 126.1, 54.5, 51.1, 50.5, 49.0, 27.5, 20.6. HRMS-ESI ( $m/z$ ): Calculated for  $\text{C}_{15}\text{H}_{21}\text{BrNO}_2$  ( $M + \text{H}$ ) $^+$ : 326.0756 ( $^{79}\text{Br}$ ), 328.0735 ( $^{81}\text{Br}$ ), Found: 326.0752 ( $^{79}\text{Br}$ ),

328.0749 (<sup>81</sup>Br).

**1'-(*tert*-Butyl)-4',4'-dimethyl-4H-spiro[naphthalene-1,3'-pyrrolidine]-4,5'-dione**

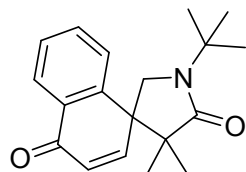

**2s**

Pale yellow solid, 50% yield, mp: 110 - 114 °C. <sup>1</sup>H NMR (400 MHz, CDCl<sub>3</sub>) δ 8.19 (d, *J* = 8.0, 1H), 7.66 (d, *J* = 8.0, 1H), 7.56 – 7.52 (m, 1H), 7.44 (t, *J* = 8.0, 1H), 7.02 (d, *J* = 10.4, 1H), 6.58 (d, *J* = 10.4, 1H), 3.85 (d, *J* = 10.4, 1H), 3.78 (d, *J* = 10.4, 1H), 1.52 (s, 9H), 1.17 (s, 3H), 0.64 (s, 3H). <sup>13</sup>C NMR (100 MHz, CDCl<sub>3</sub>) δ 184.0, 178.0, 150.4, 144.6, 132.6, 131.6, 130.1, 127.6, 127.0, 125.4, 54.4, 52.8, 52.2, 46.8, 27.4, 23.3, 20.3. HRMS-ESI (*m/z*): Calculated for C<sub>16</sub>H<sub>23</sub>NO<sub>3</sub>Na (*M* + Na)<sup>+</sup>: 320.1626, Found: 320.1621.

## 6. References:

1. S. D. Bull, S. G. Davies, G. Fenton, A. W. Mulvaney, R. S. Prasad and A. D. Smith, *J. Chem. Soc., Perkin Trans. 1*, 2000, 3765;
2. T. R. Ibarra-Rivera, R. Gamez-Montano and L. D. Miranda, *Chem. Commun.*, 2007, 3485.
3. L. Yan, F. Zhao, Y. Gan, J. Zhao and Z. Jiang, *Synth. Commun.*, 2011, **42**, 285.

## 7. NMR spectra of the products

### 2-Bromo-*N*-(*tert*-butyl)-*N*-(4-methoxybenzyl)-2-methylpropanamide (**1a**)

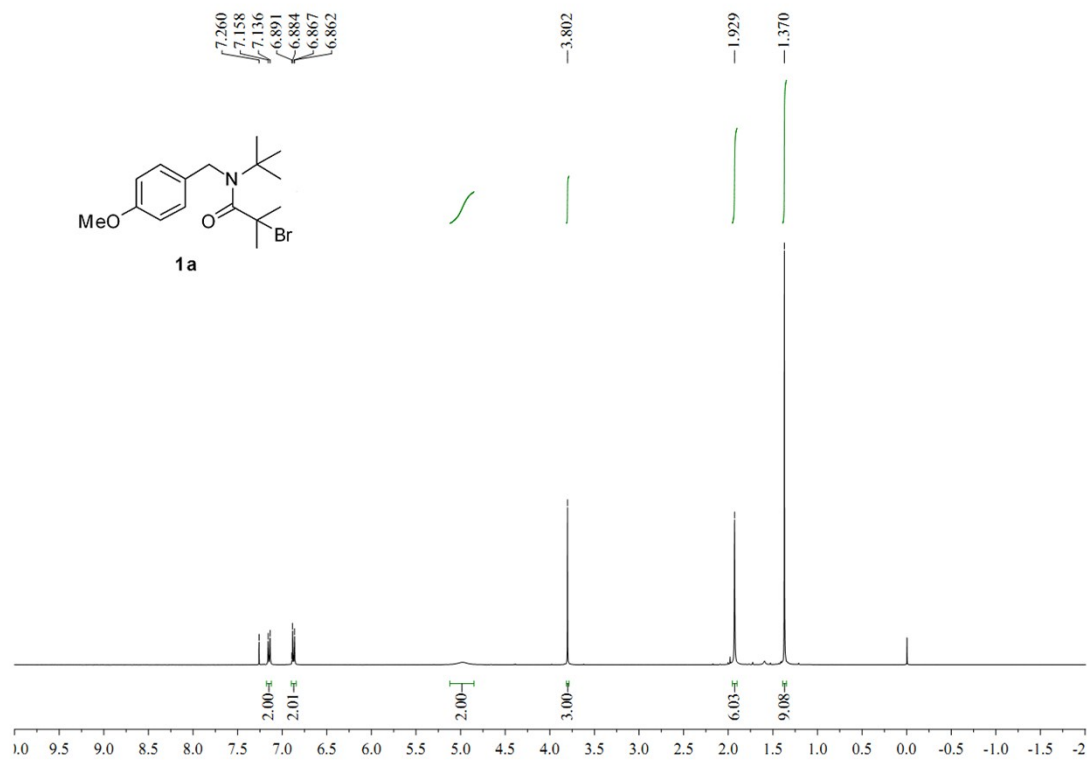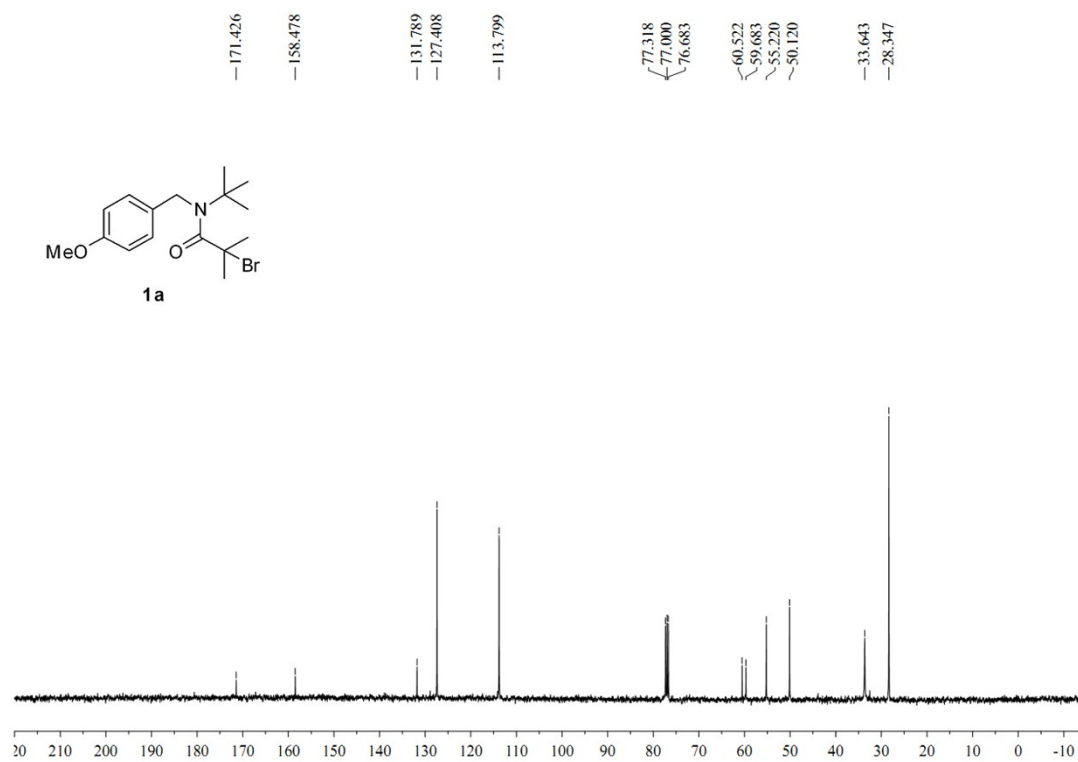

## 2-Bromo-N-methyl-N-(4-methoxybenzyl)-2-methylpropanamide (1b)

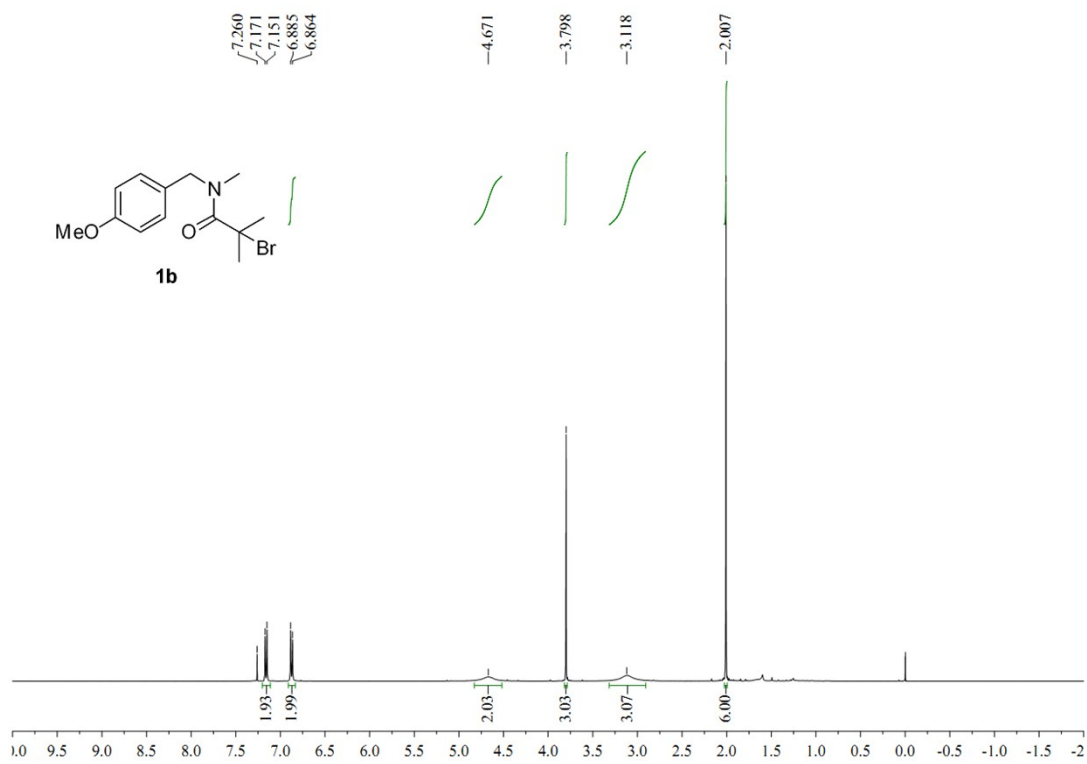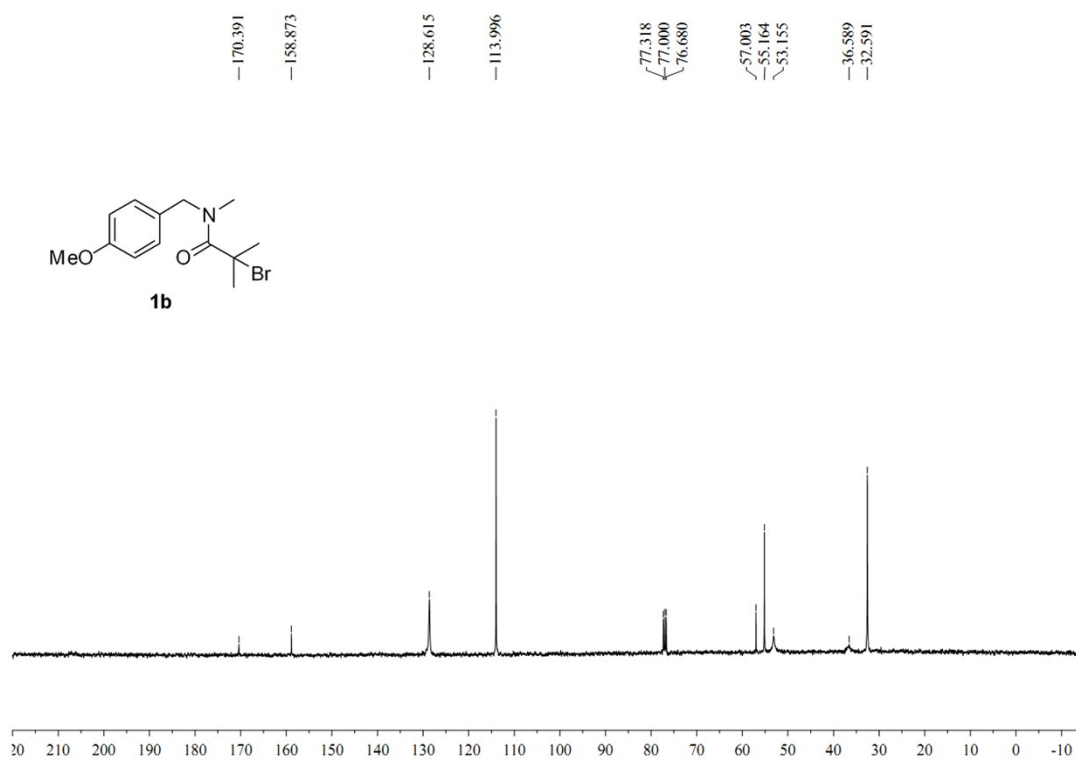



## 2-Bromo-N-isopropyl-N-(4-methoxybenzyl)-2-methylpropanamide (1c)

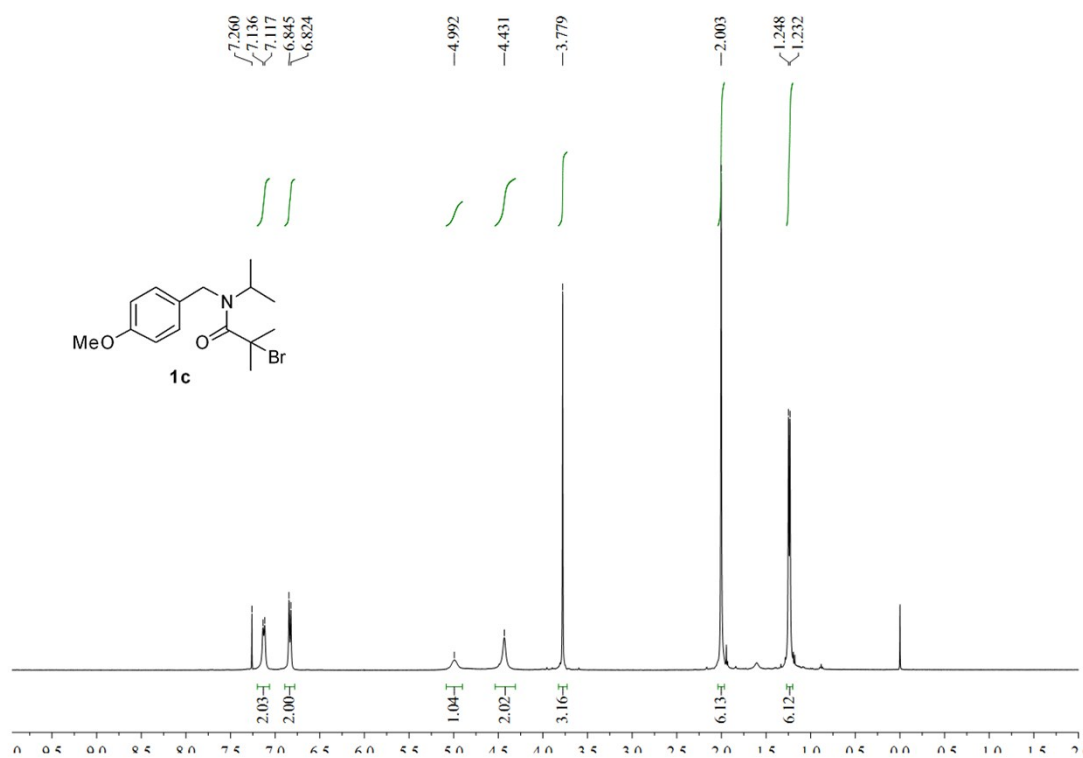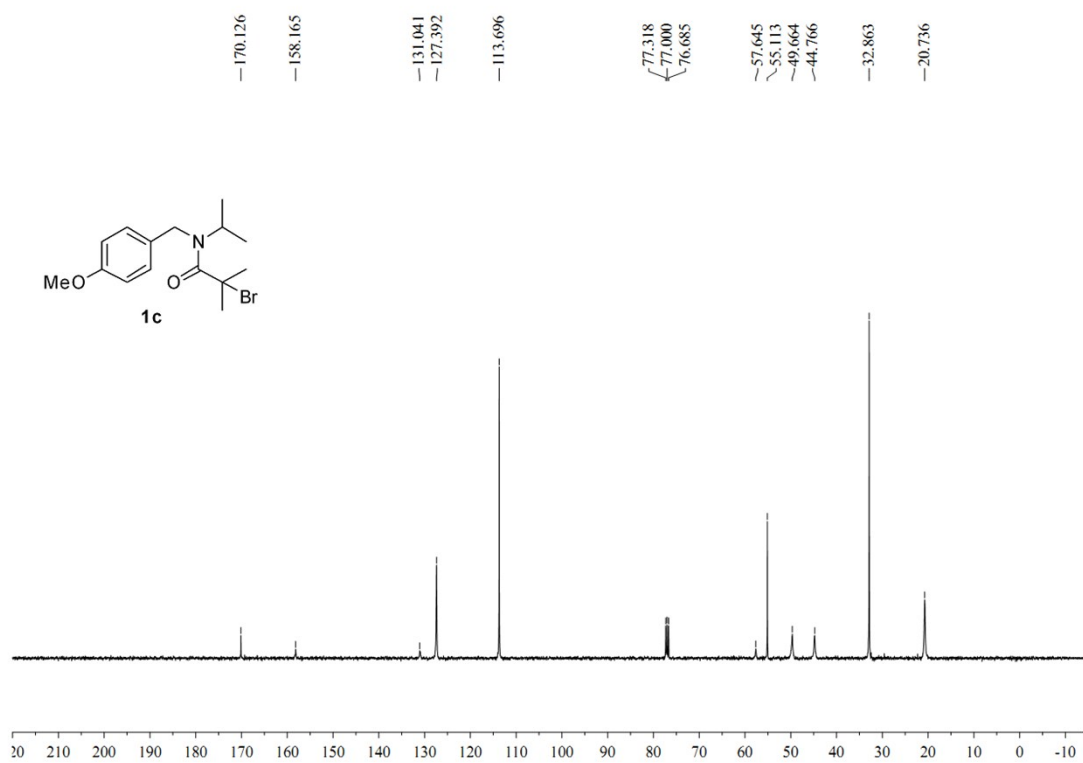

## 2-Bromo-N-butyl-N-(4-methoxybenzyl)-2-methylpropanamide (1d)

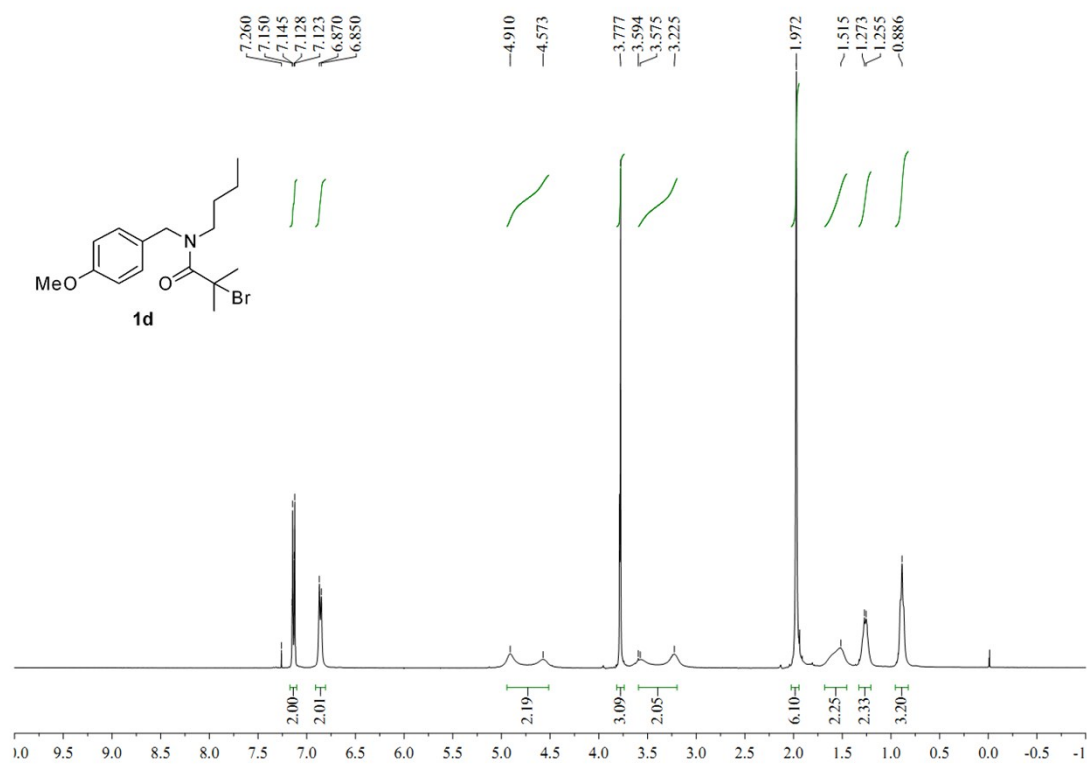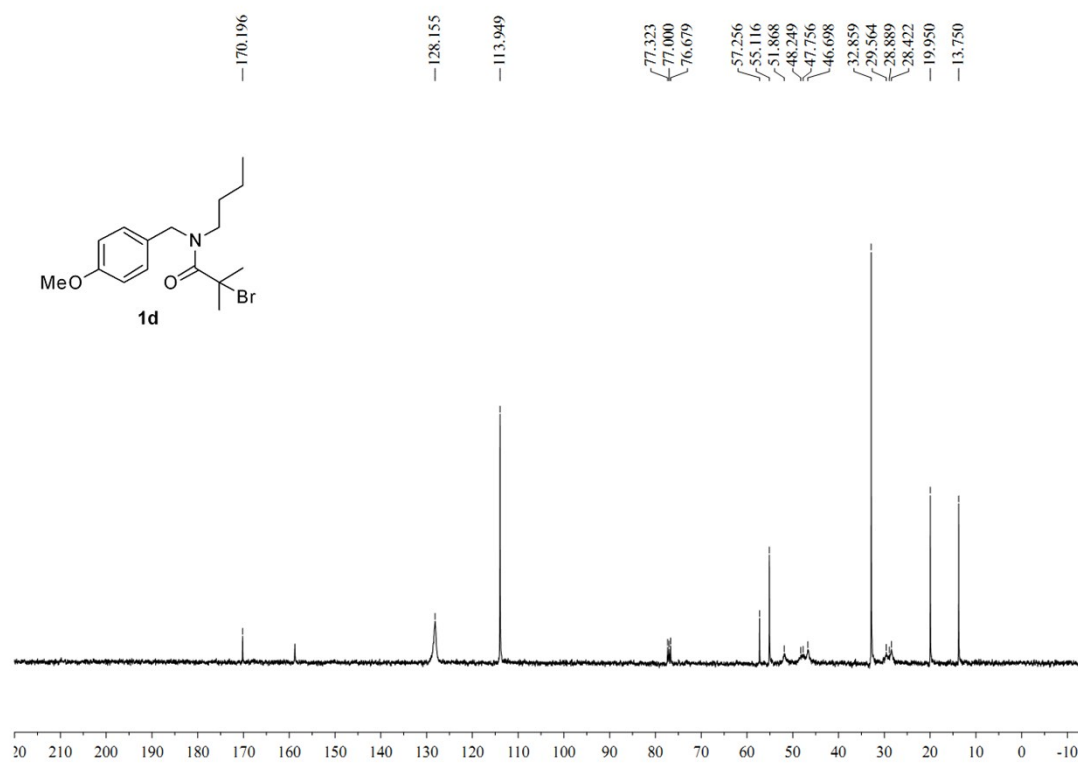

## 2-Bromo-N-cyclohexyl-N-(4-methoxybenzyl)-2-methylpropanamide (1e)

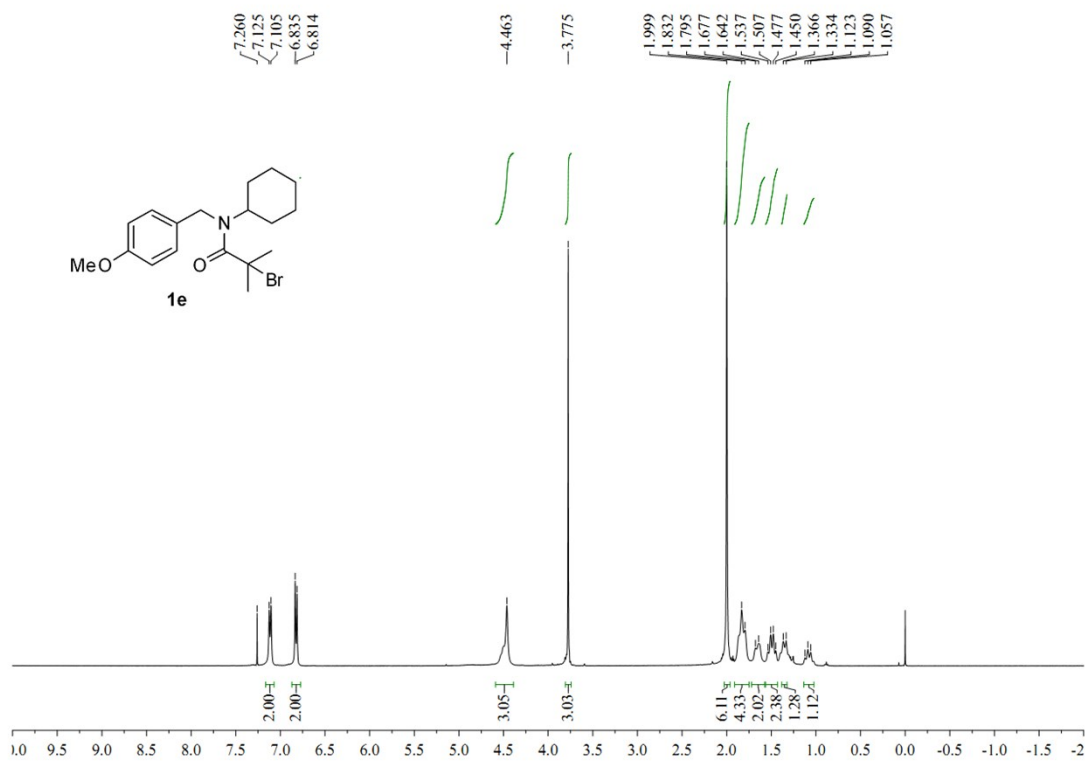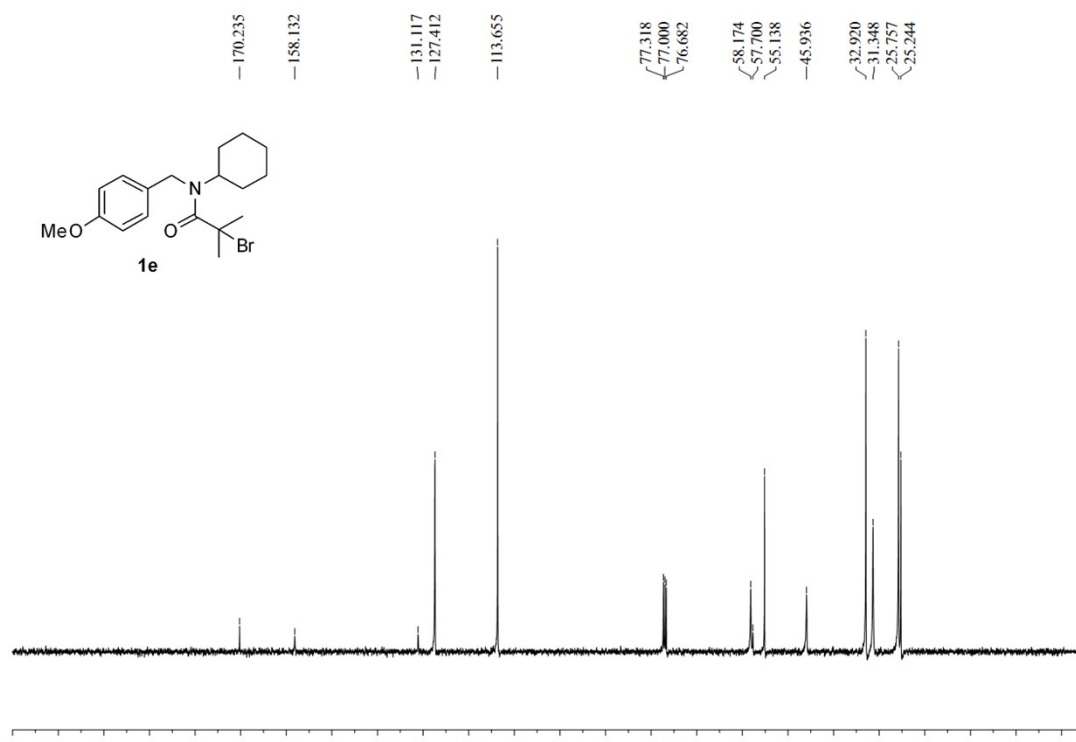

## 2-Bromo-N-(4-methoxybenzyl)-2-methylpropanamide (1f)

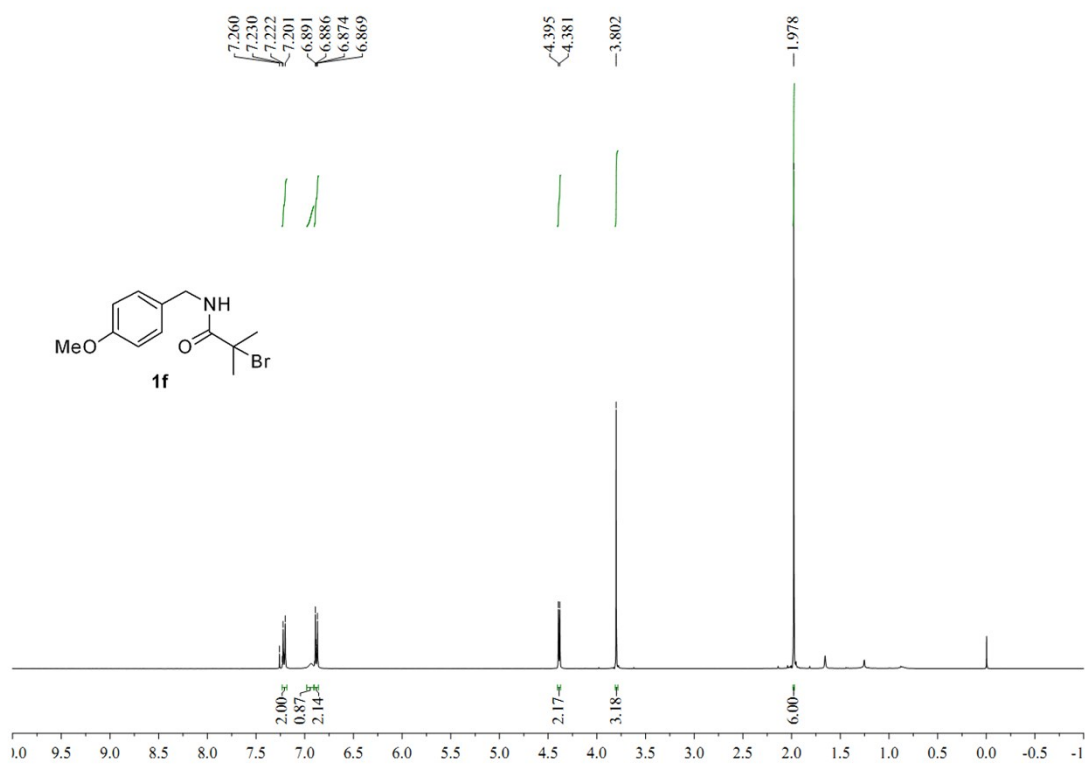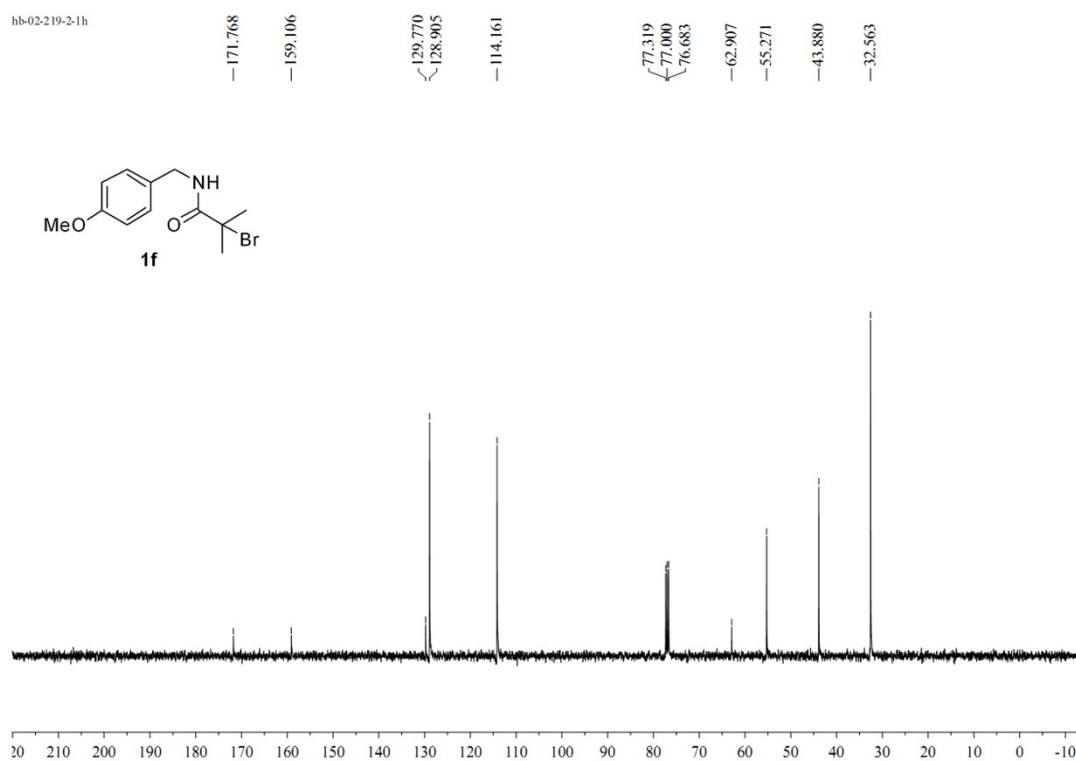

## 2-Bromo-N-(4-methoxybenzyl)-2-methyl-N-phenylpropanamide (1g)

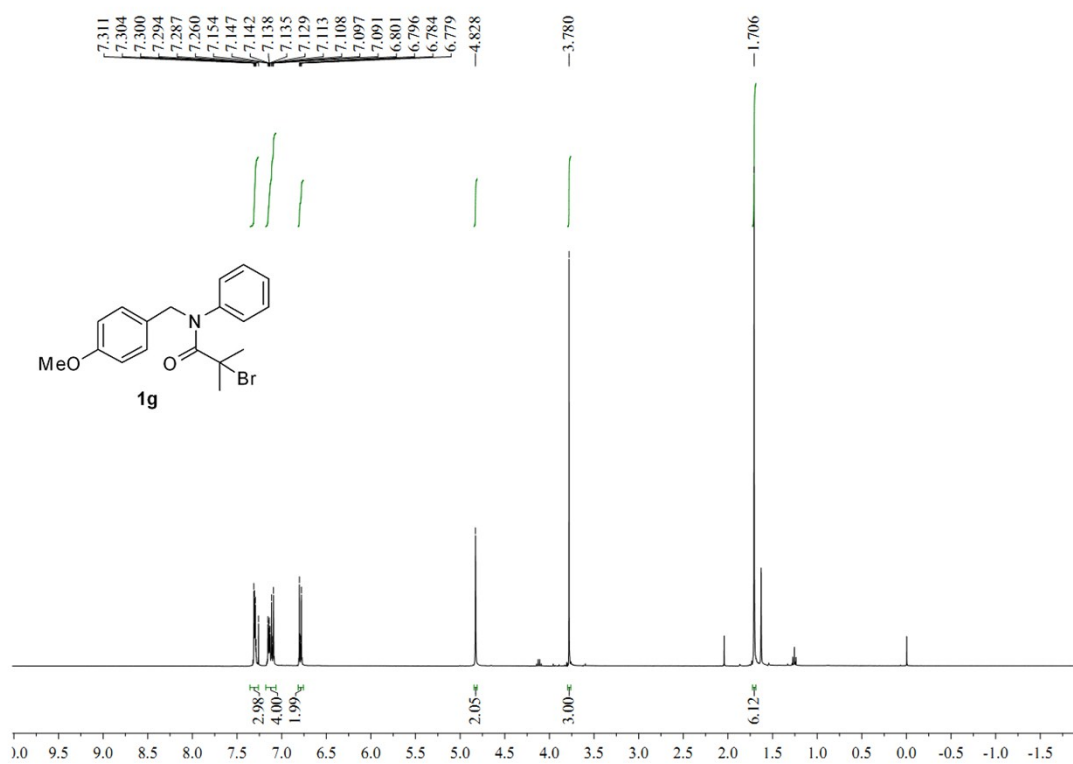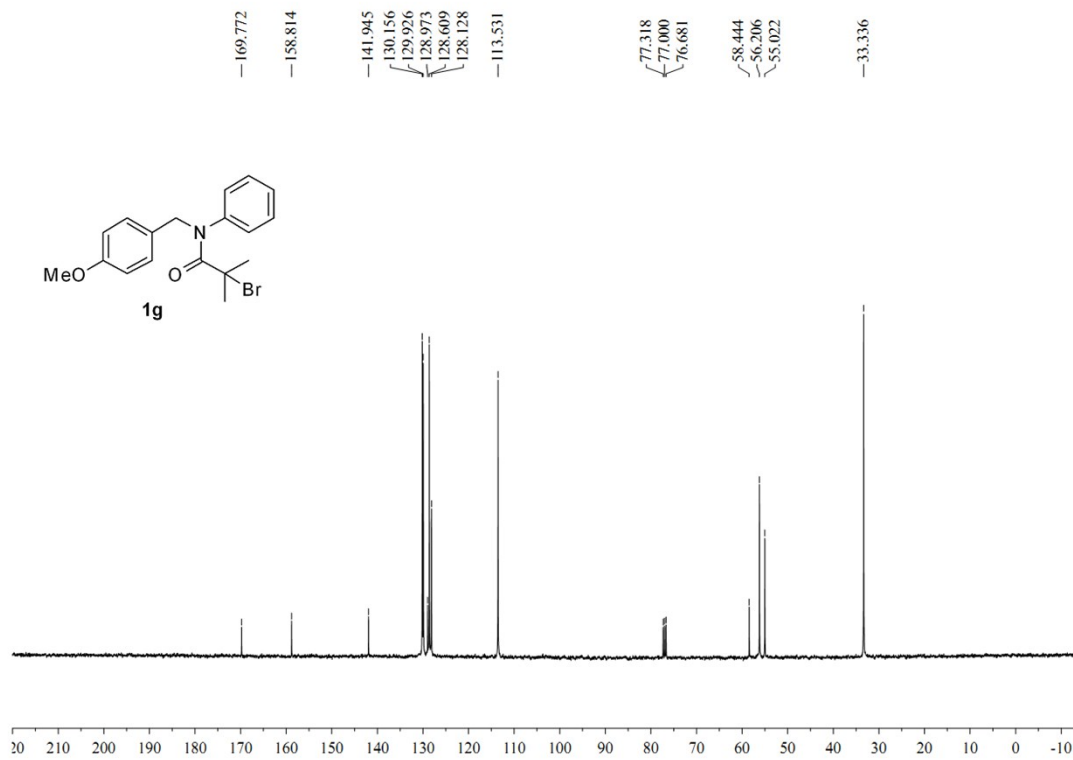

***N*-Benzyl-2-bromo-*N*-(4-methoxybenzyl)-2-methylpropanamide (1h)**

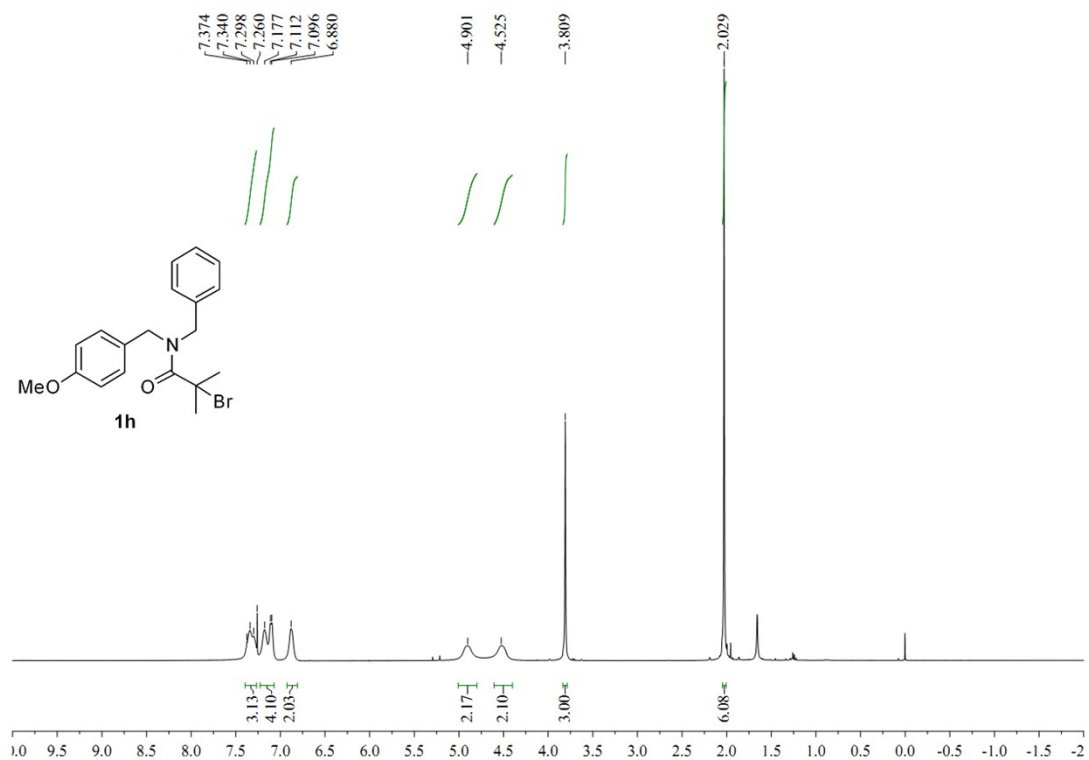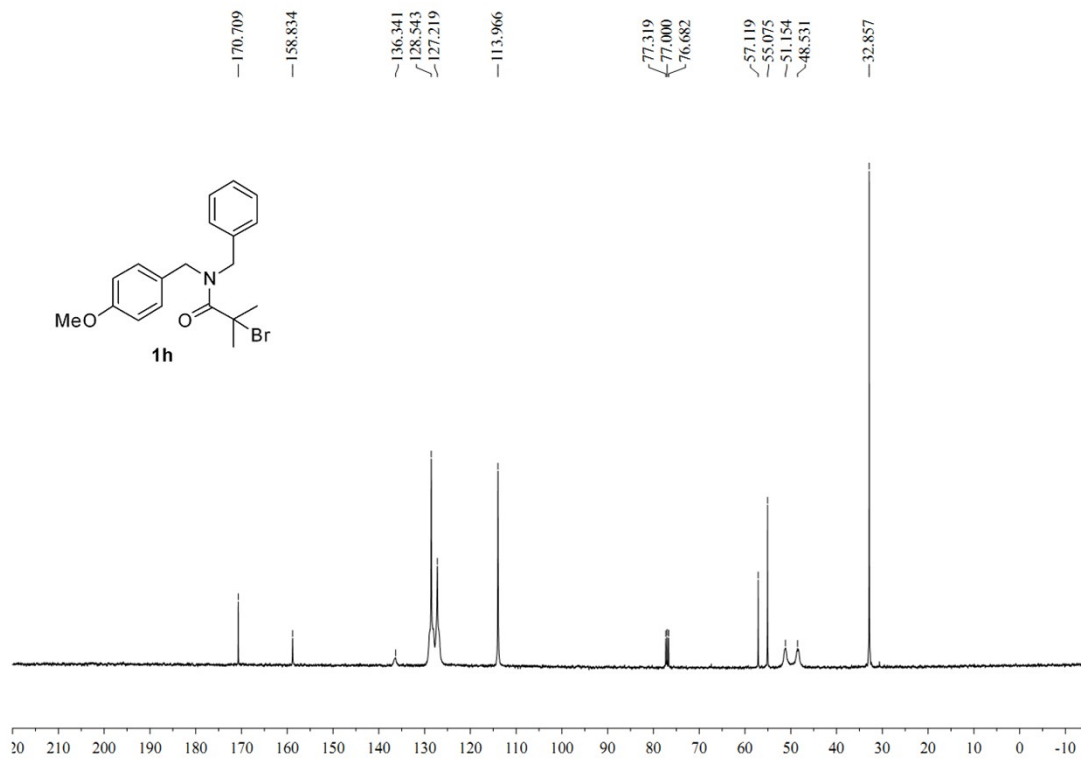

**Methyl 2-(2-bromo-N-(4-methoxybenzyl)-2-methylpropanamido)acetate (1i)**

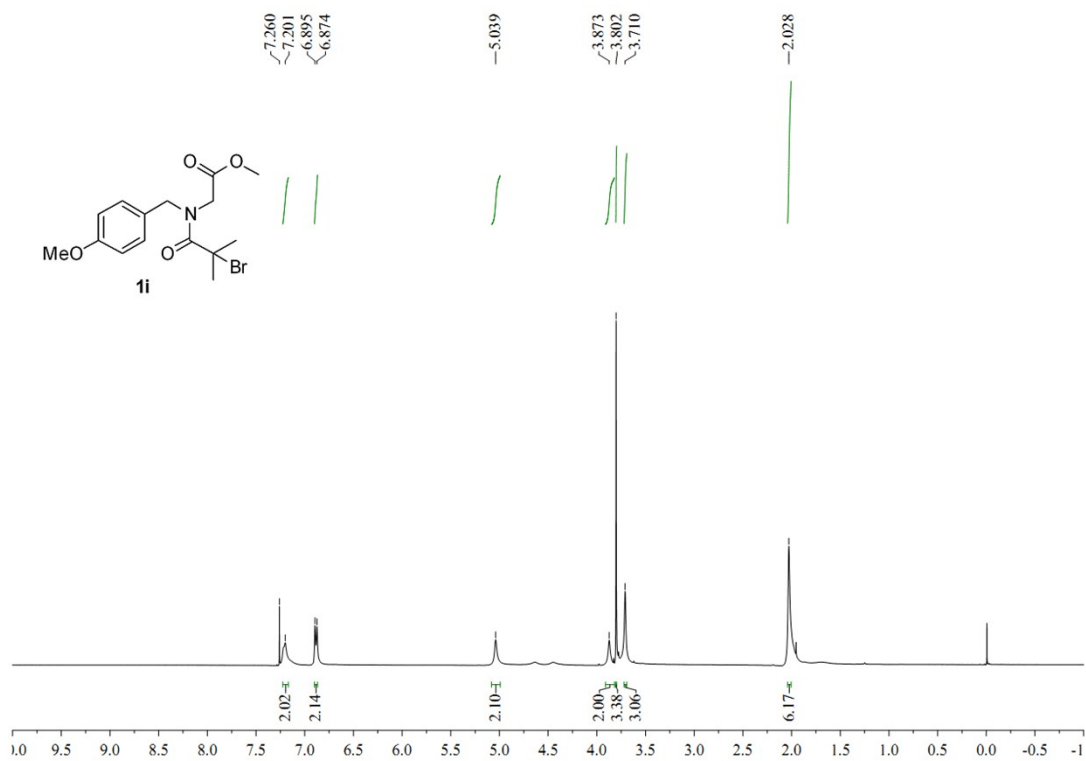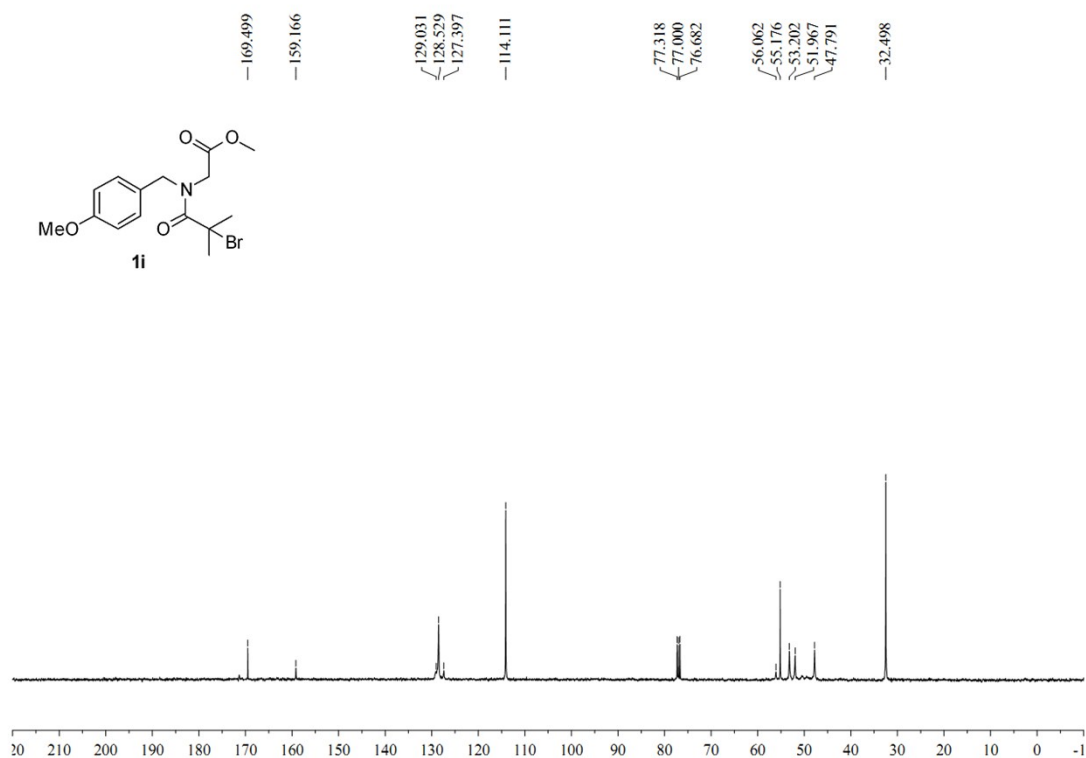

### *N*-Allyl-2-bromo-*N*-(4-methoxybenzyl)-2-methylpropanamide (**1j**)

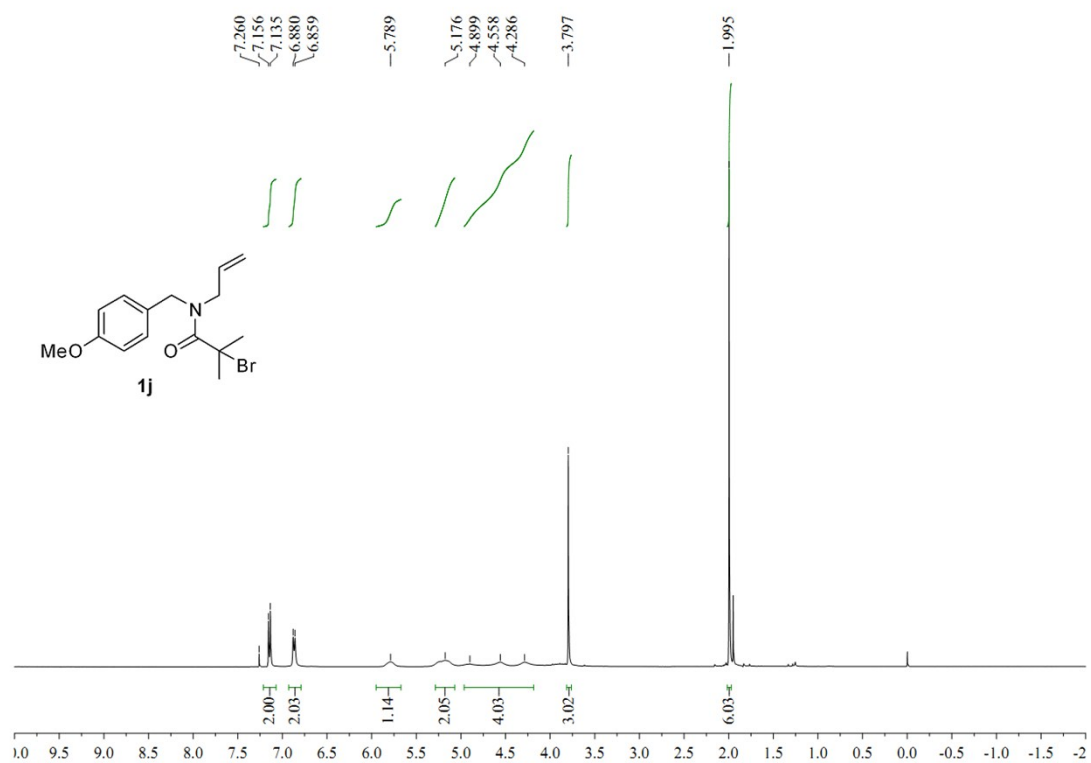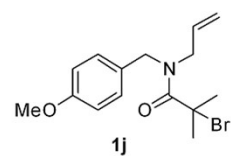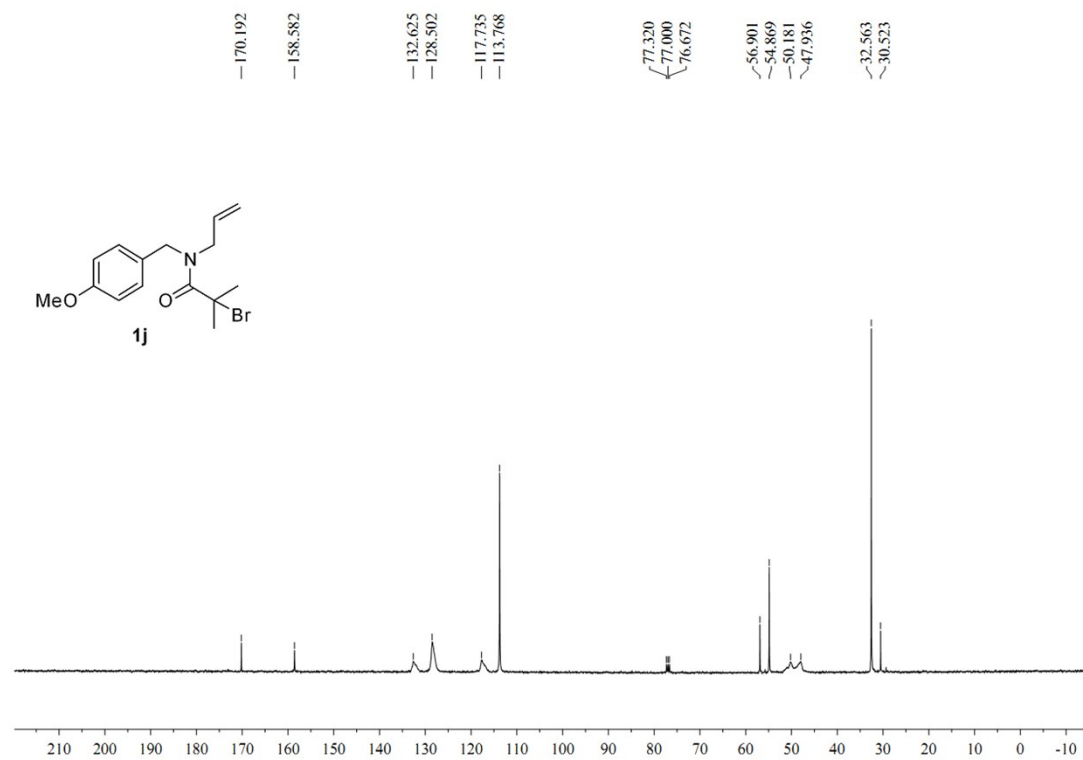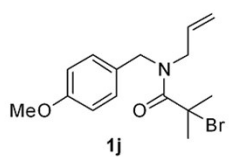



**2-Bromo-N-(*tert*-butyl)-N-(4-methoxybenzyl)propanamide (1k)**

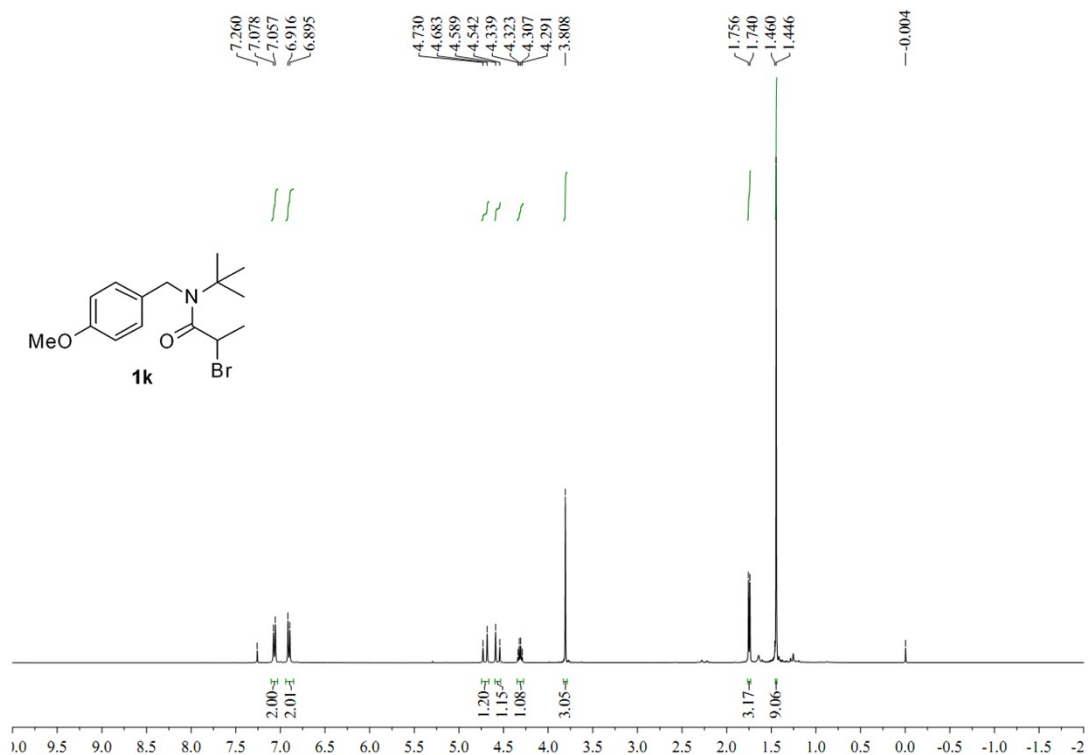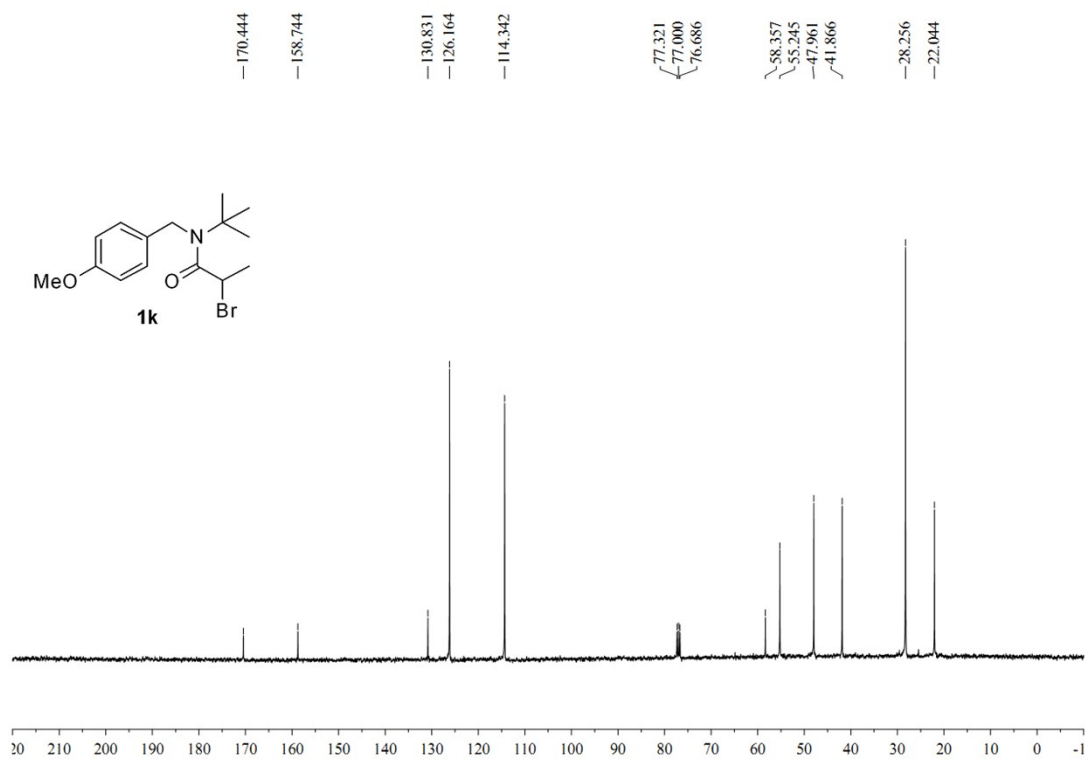

**2-Bromo-N-(tert-butyl)-N-(4-methoxybenzyl)acetamide (11)**

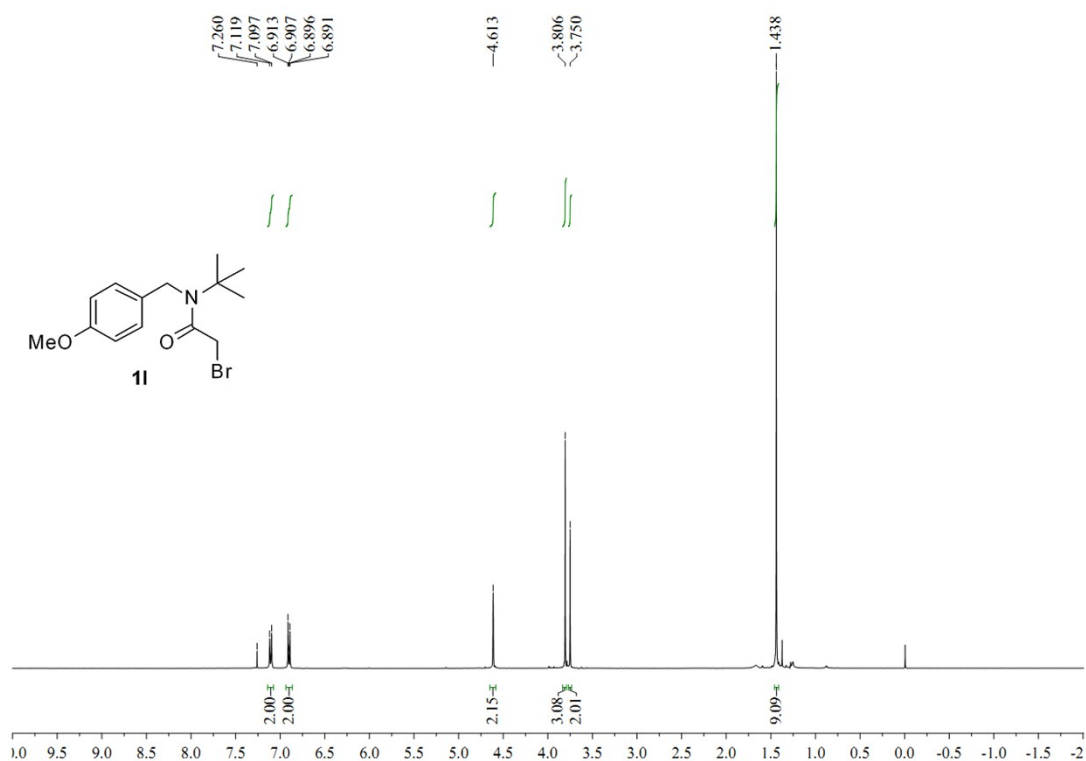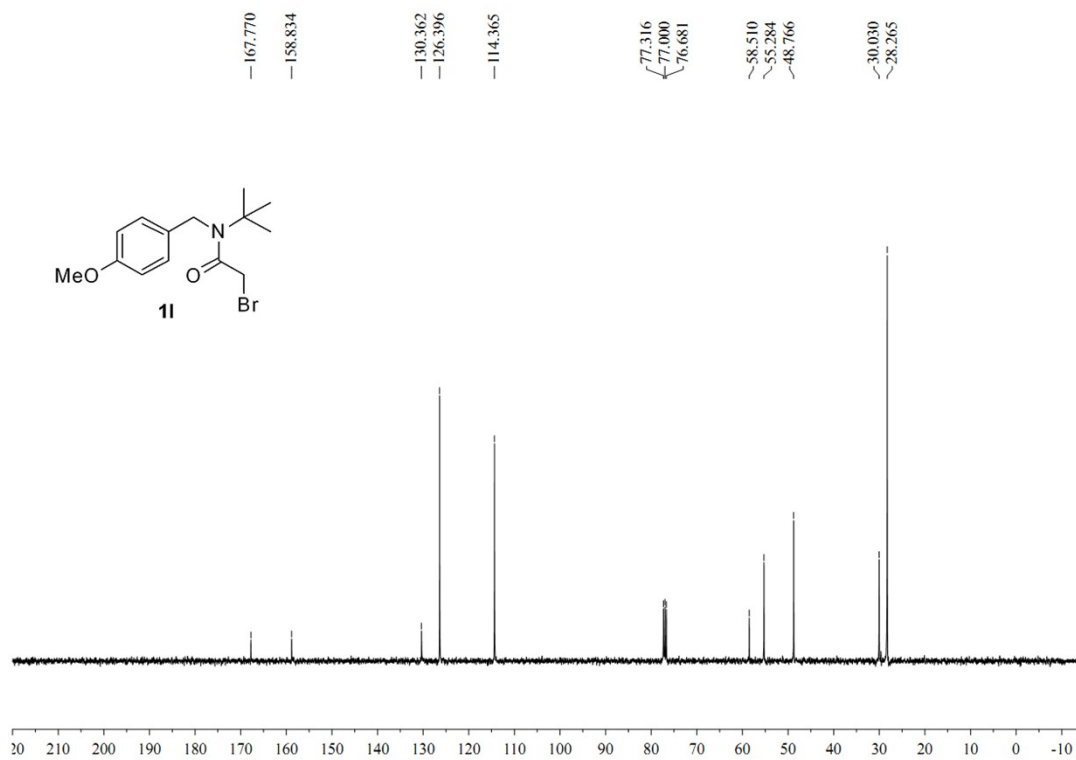

***N*-4-(Benzyloxy)benzyl-2-bromo-*N*-(*tert*-butyl)-2-methylpropanamide (1m)**

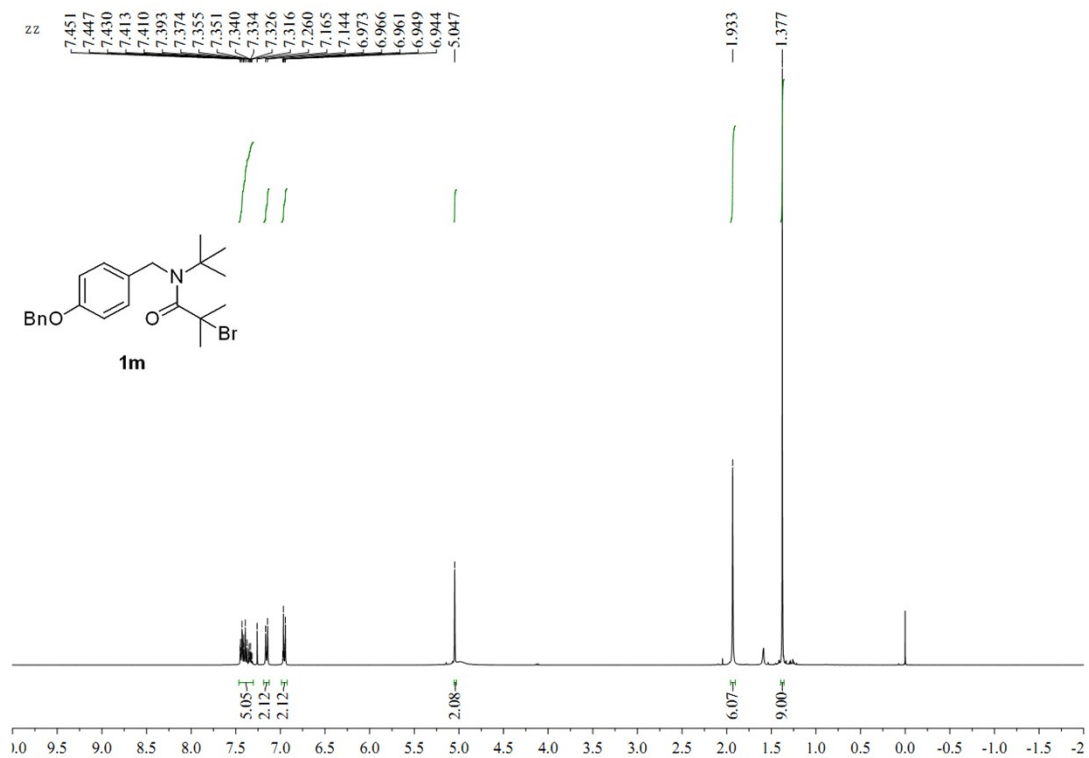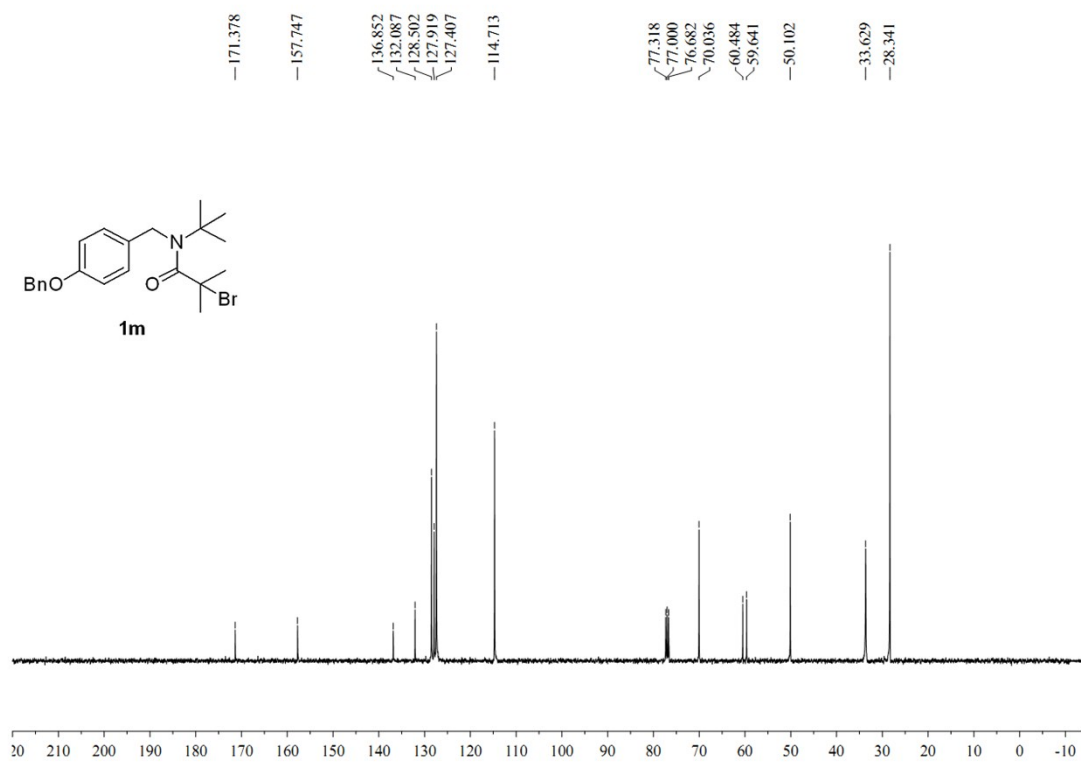

**2-Bromo-*N*-(*tert*-butyl)-2-methyl-*N*-(4-((tetrahydro-2H-pyran-2-yl)oxy)benzyl)propanamide (1n)**

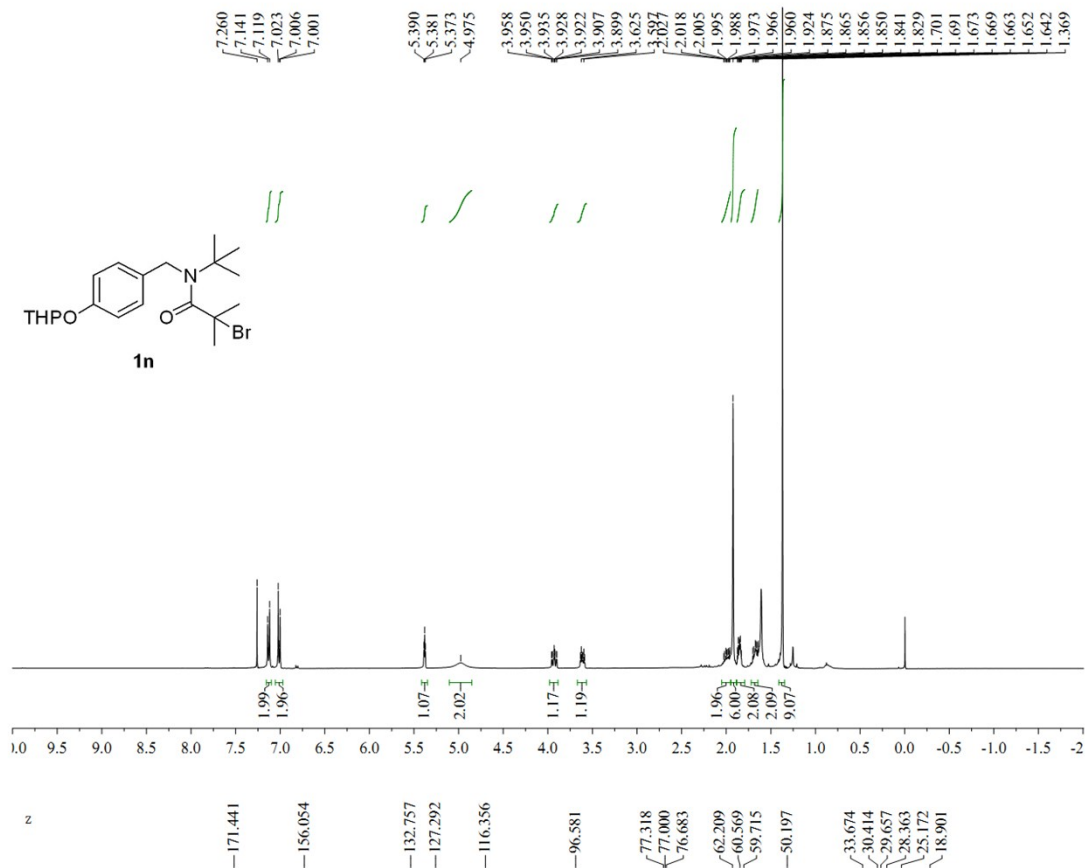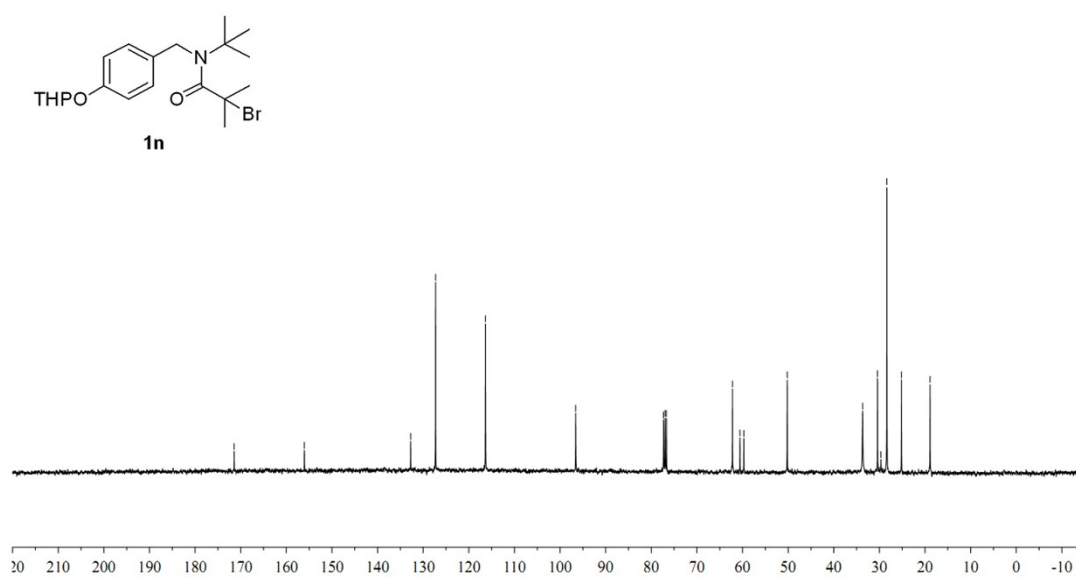

**2-Bromo-N-(*tert*-butyl)-N-(4-((*tert*-butyldimethylsilyl)oxy)benzyl)-2-methylpropanamide (1o)**

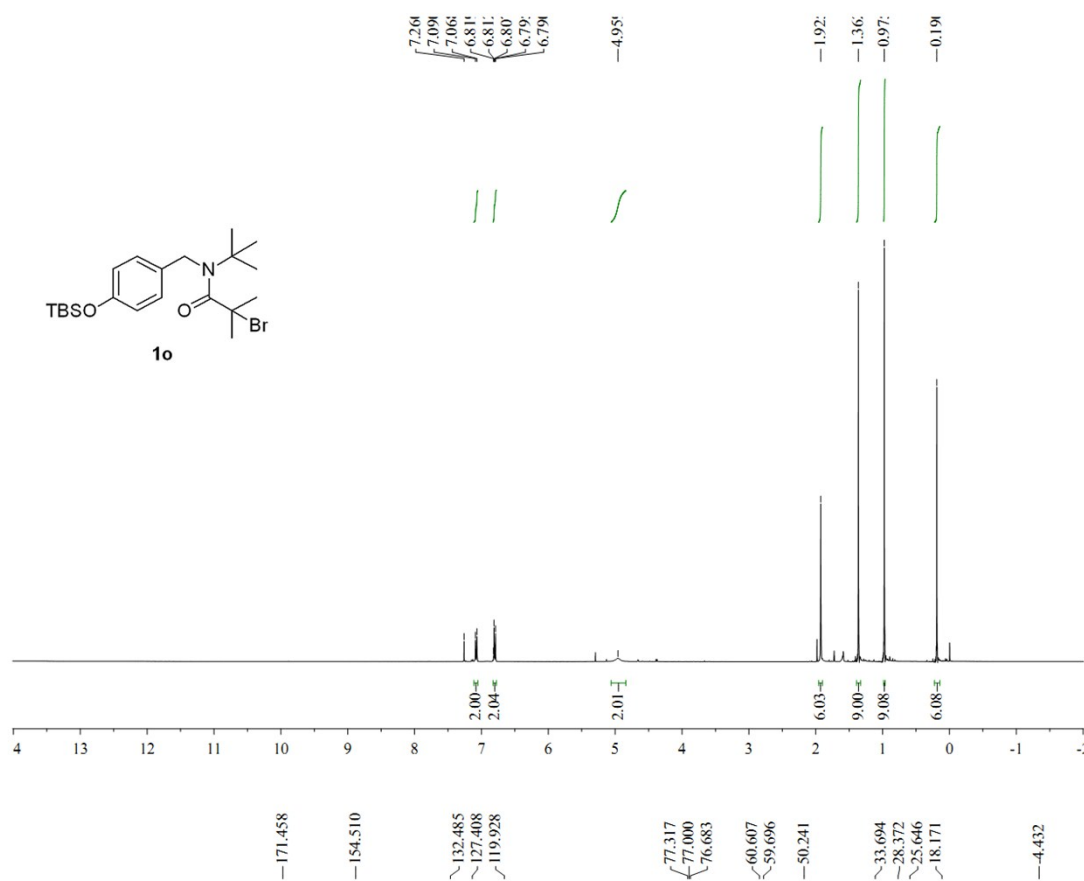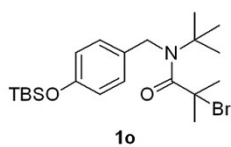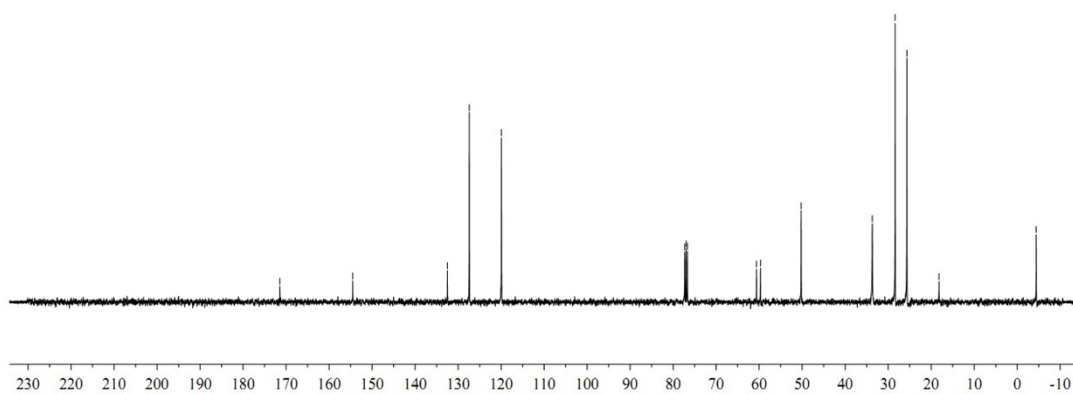

### 2-Bromo-N-(tert-butyl)-N-(4-hydroxybenzyl)-2-methylpropanamide (1p)

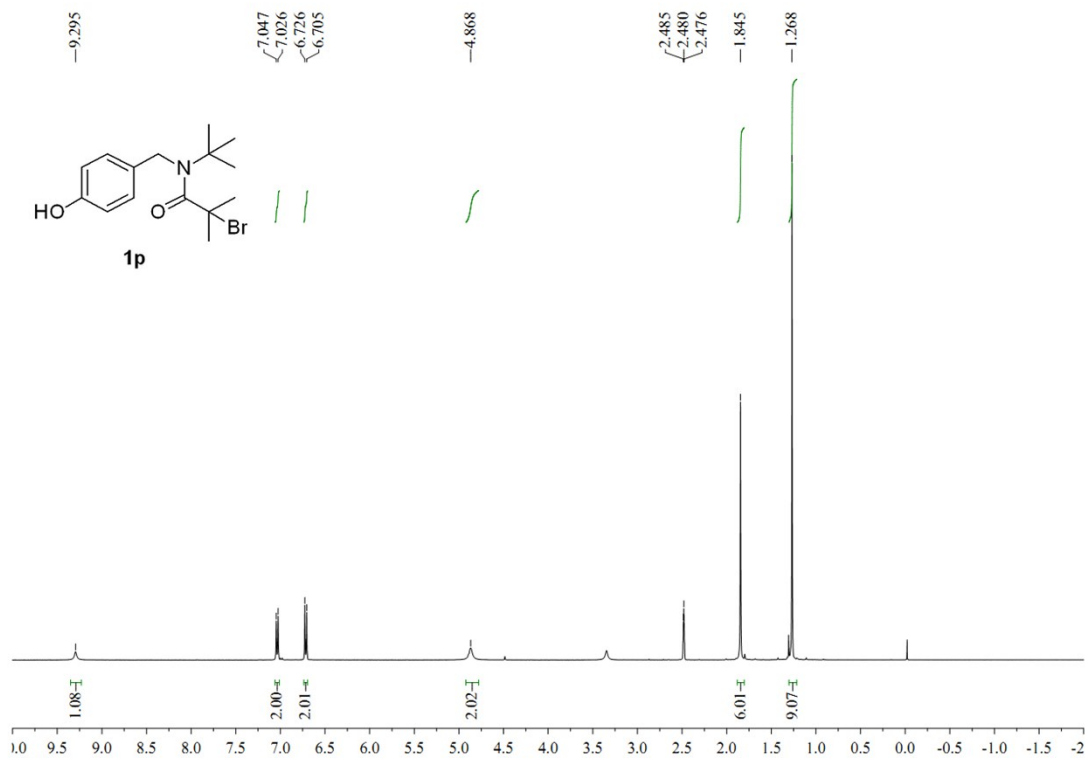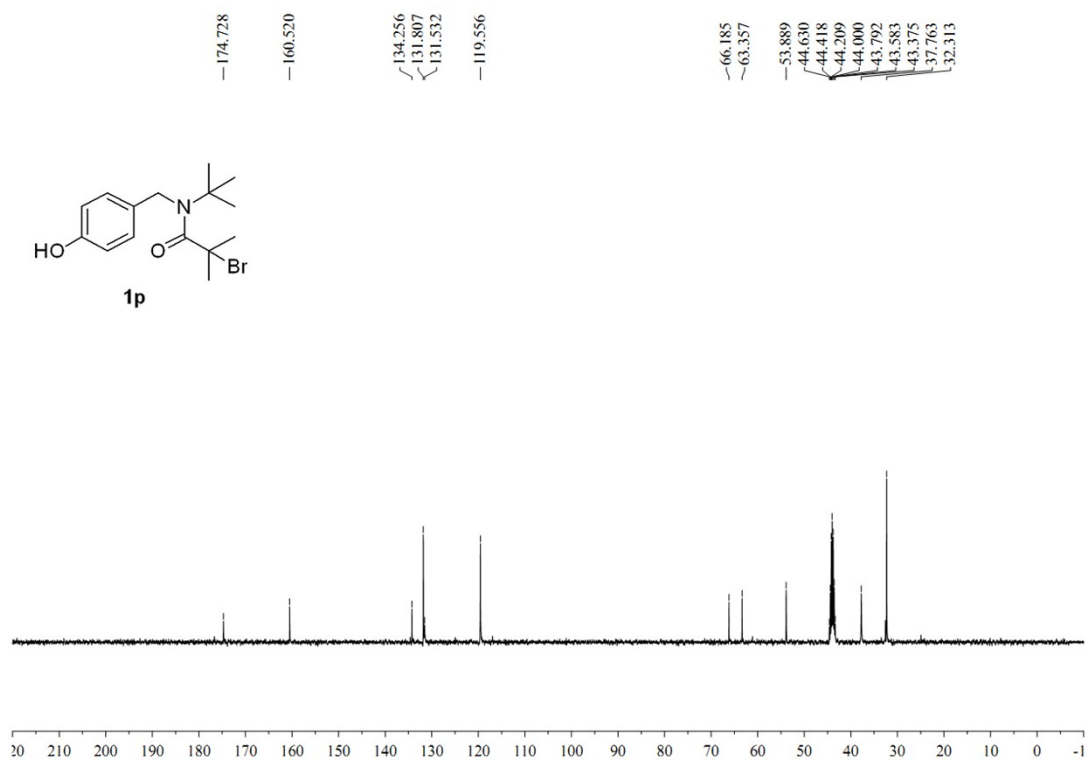

**2-Bromo-*N*-(*tert*-butyl)-*N*-(2,4-dimethoxybenzyl)-2-methylpropanamide (1q)**

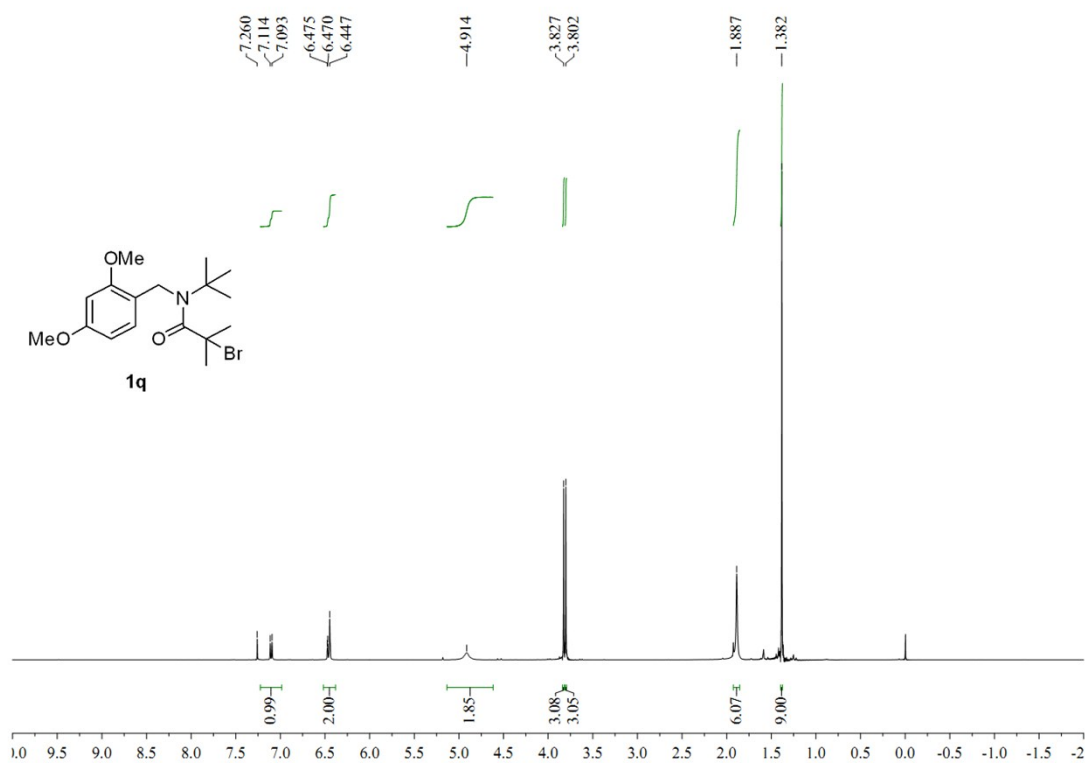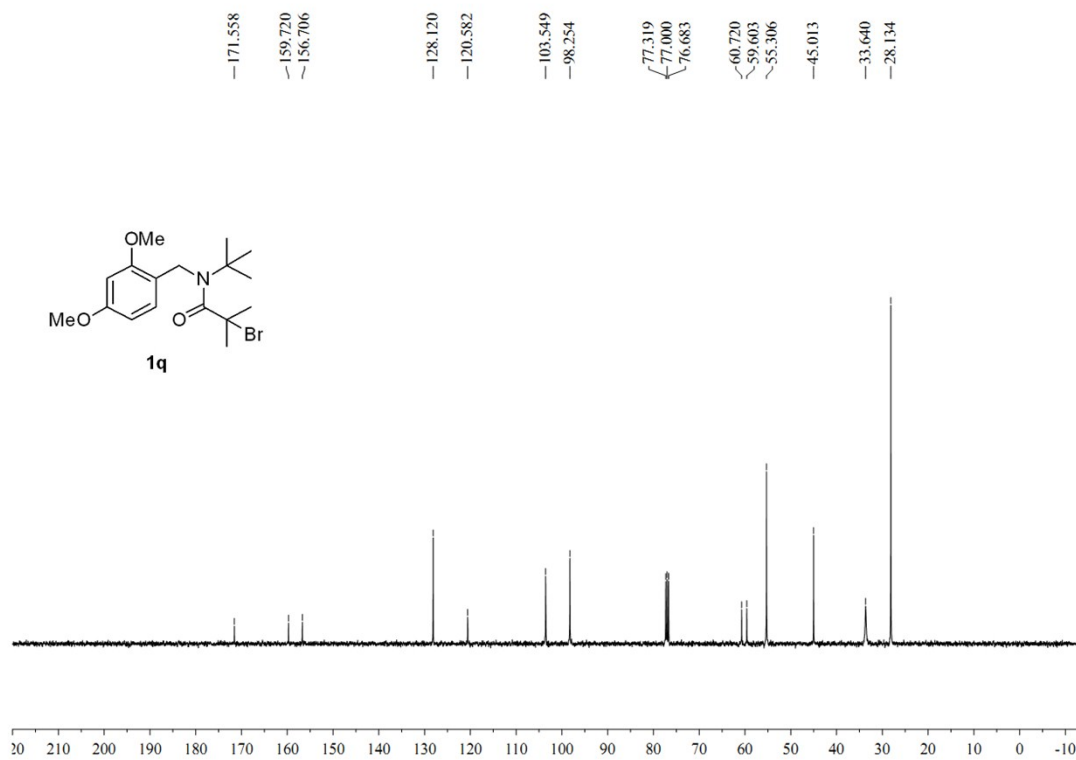

**2-Bromo-N-(3-bromo-4-methoxybenzyl)-N-(*tert*-butyl)-2-methylpropanamide (1r)**

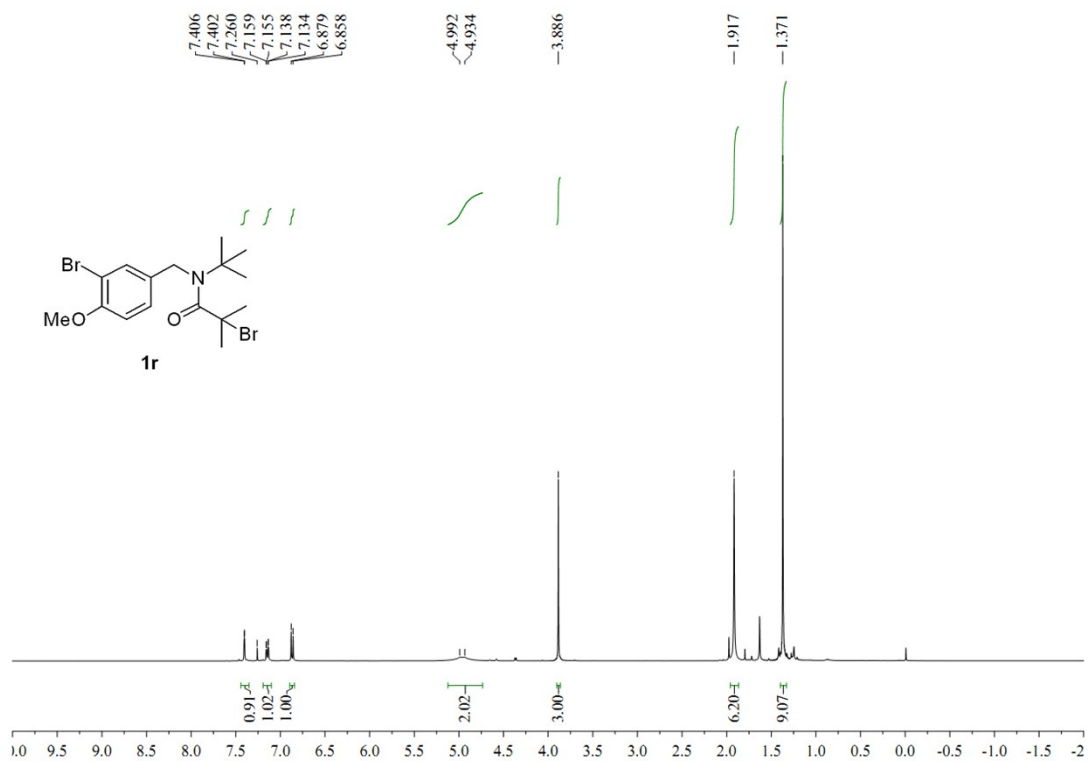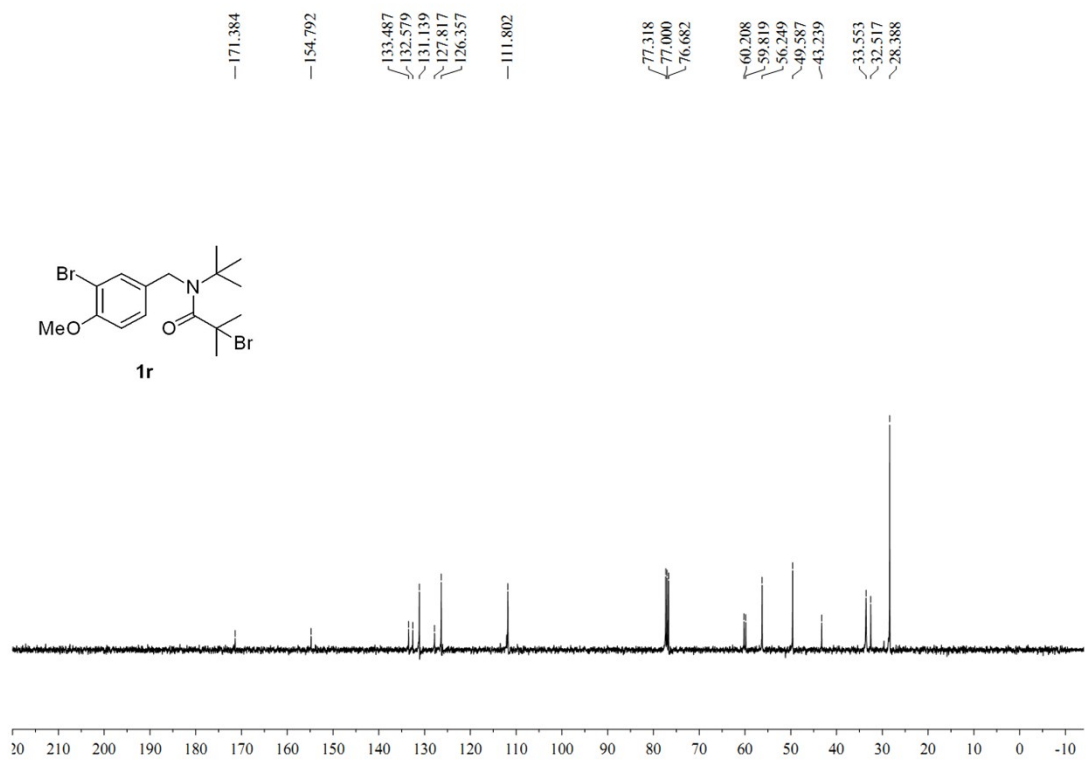



**2-Bromo-*N*-(*tert*-butyl)-*N*-((4-methoxynaphthalen-1-yl)methyl)-2-methylpropanamide  
(1s)**

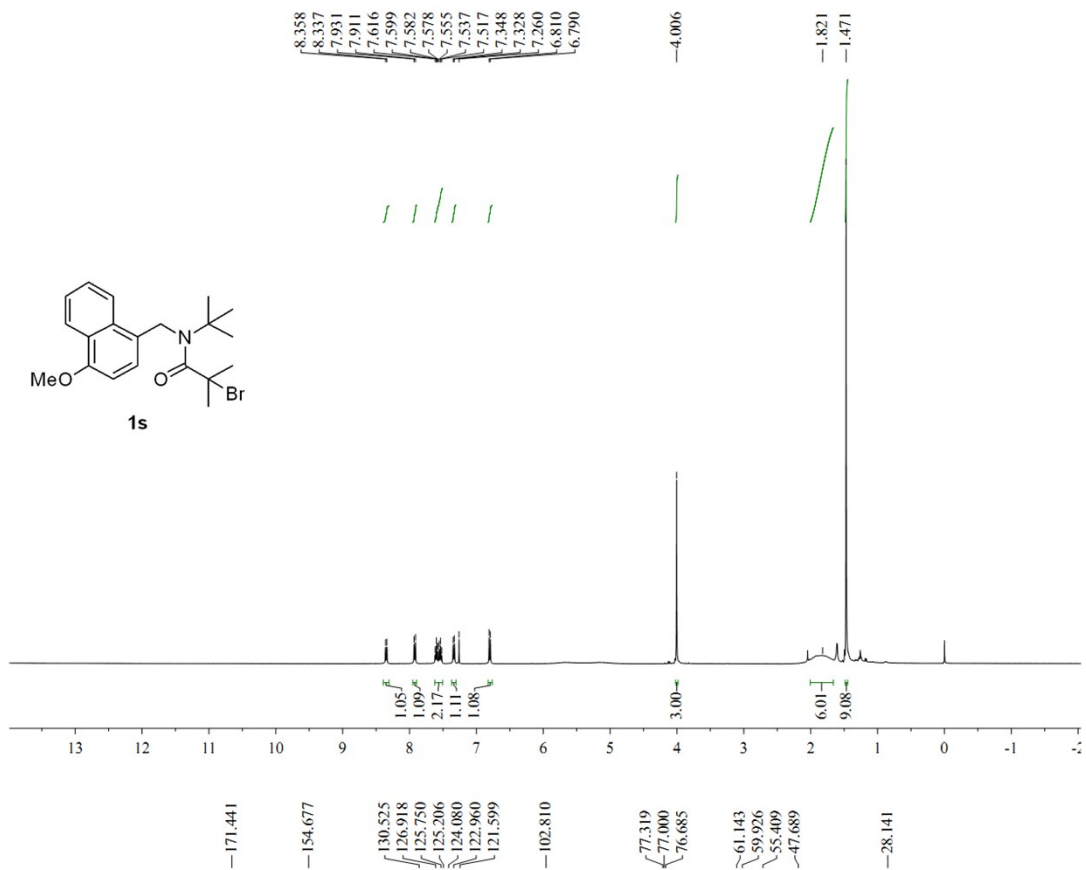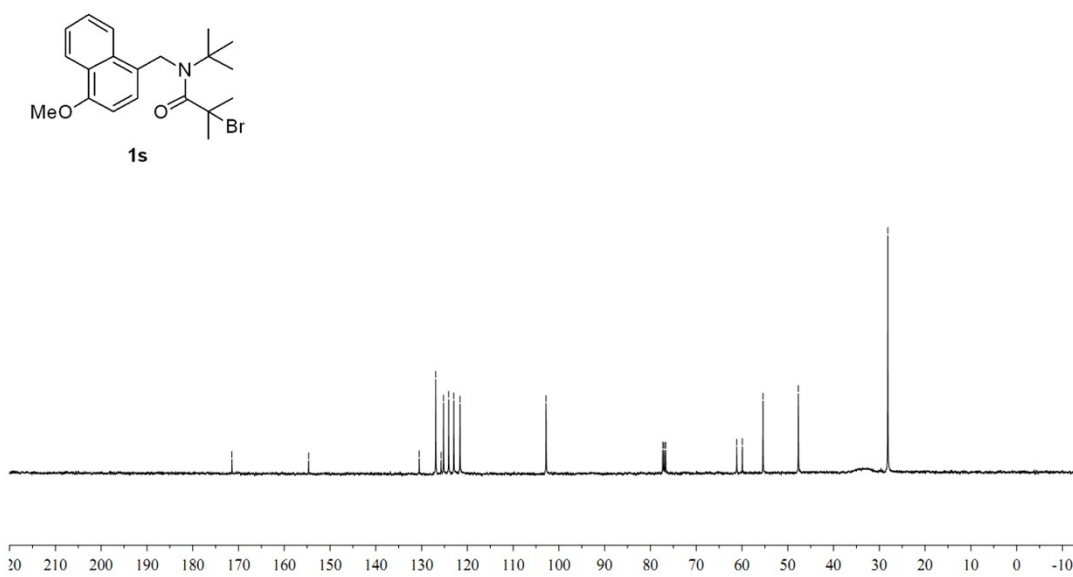

**2-(*tert*-Butyl)-4,4-dimethyl-2-azaspiro[4.5]deca-6,9-diene-3,8-dione (2a)**

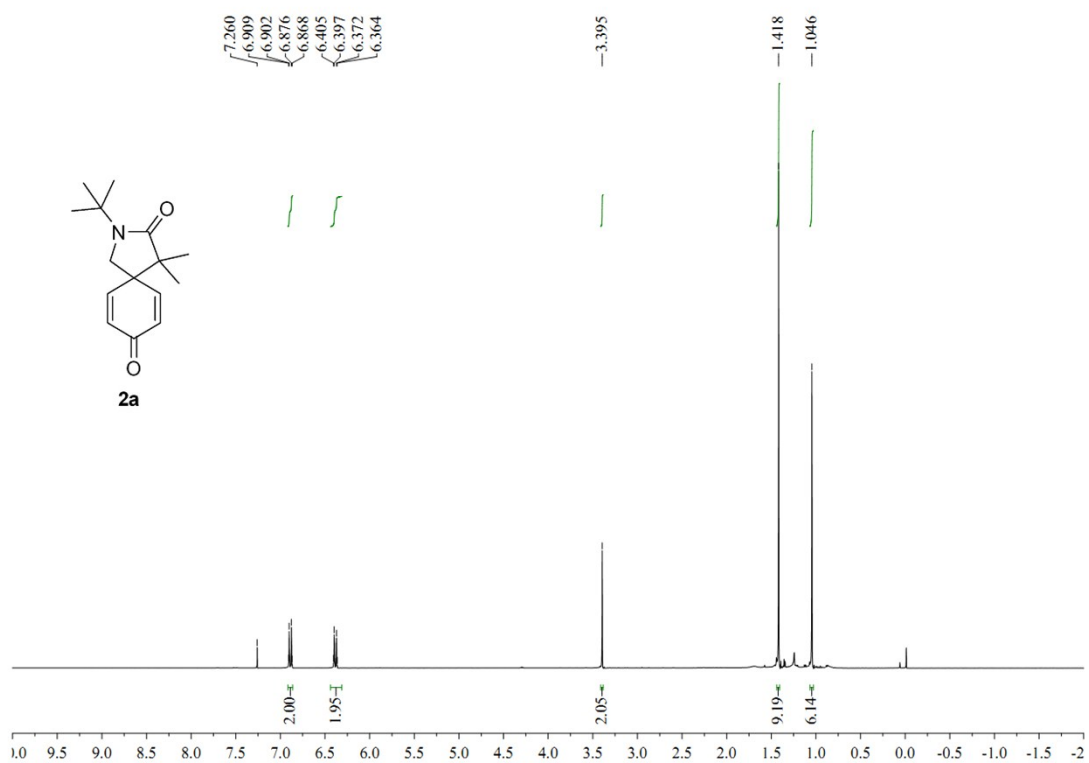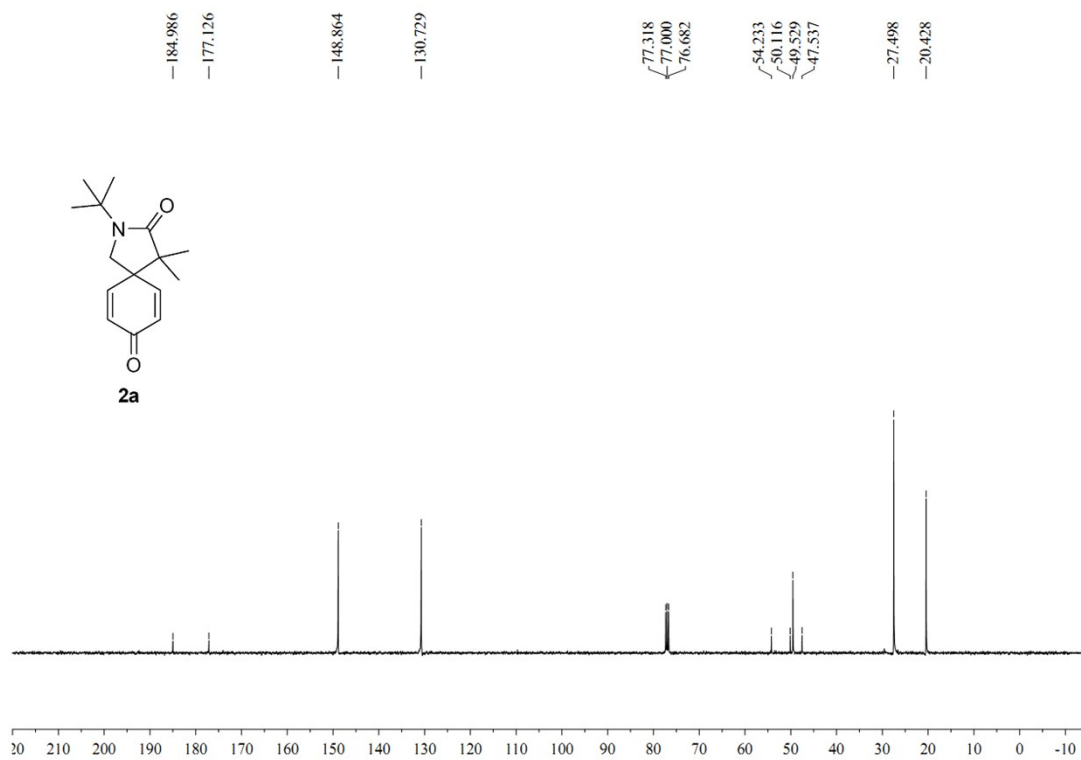

### 2,4,4-Trimethyl-2-azaspiro[4.5]deca-6,9-diene-3,8-dione (2b)

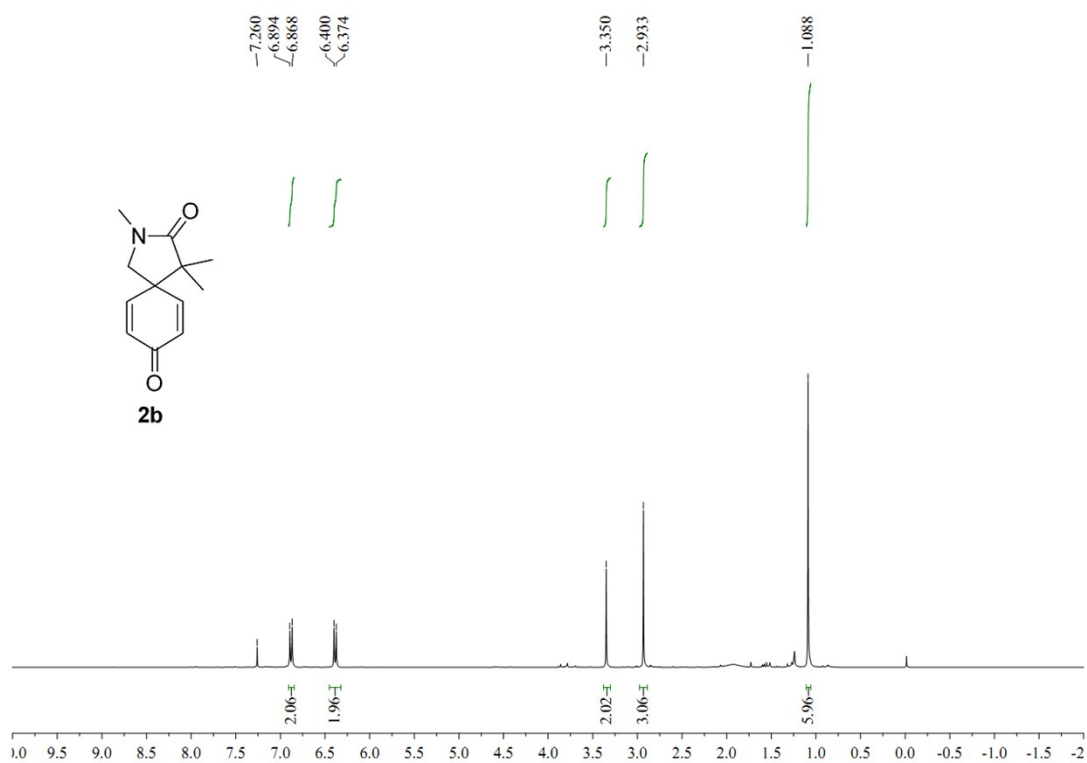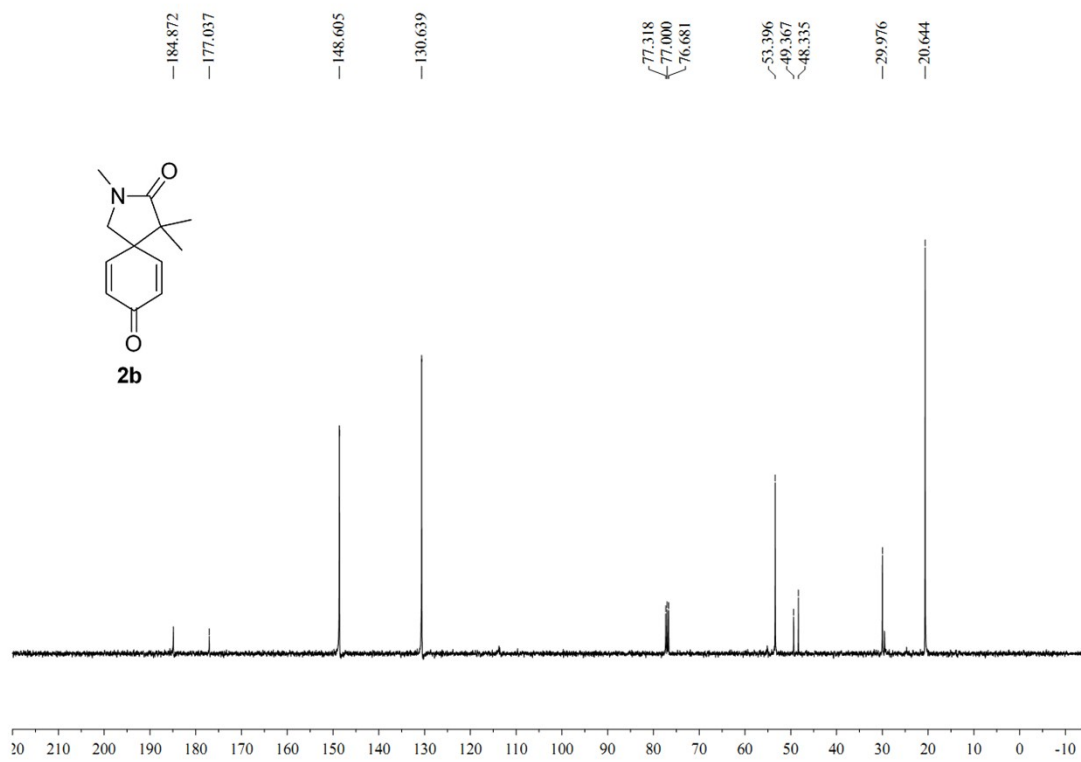

**2-Isopropyl-4,4-dimethyl-2-azaspiro[4.5]deca-6,9-diene-3,8-dione (2c)**

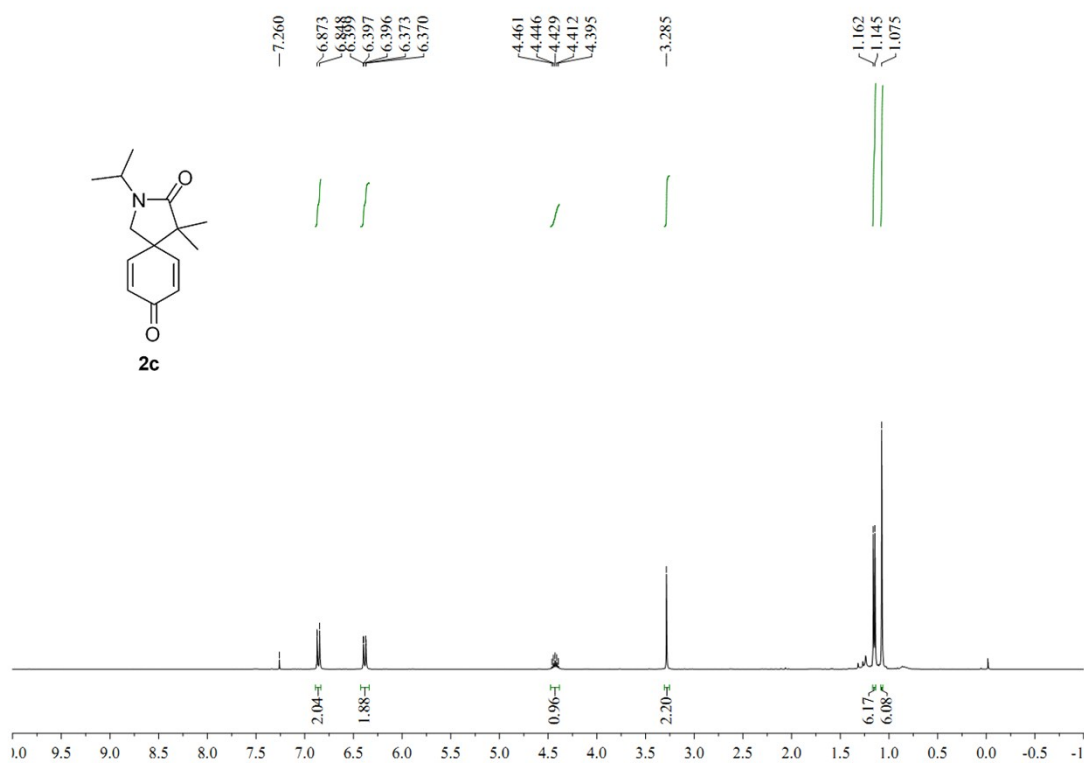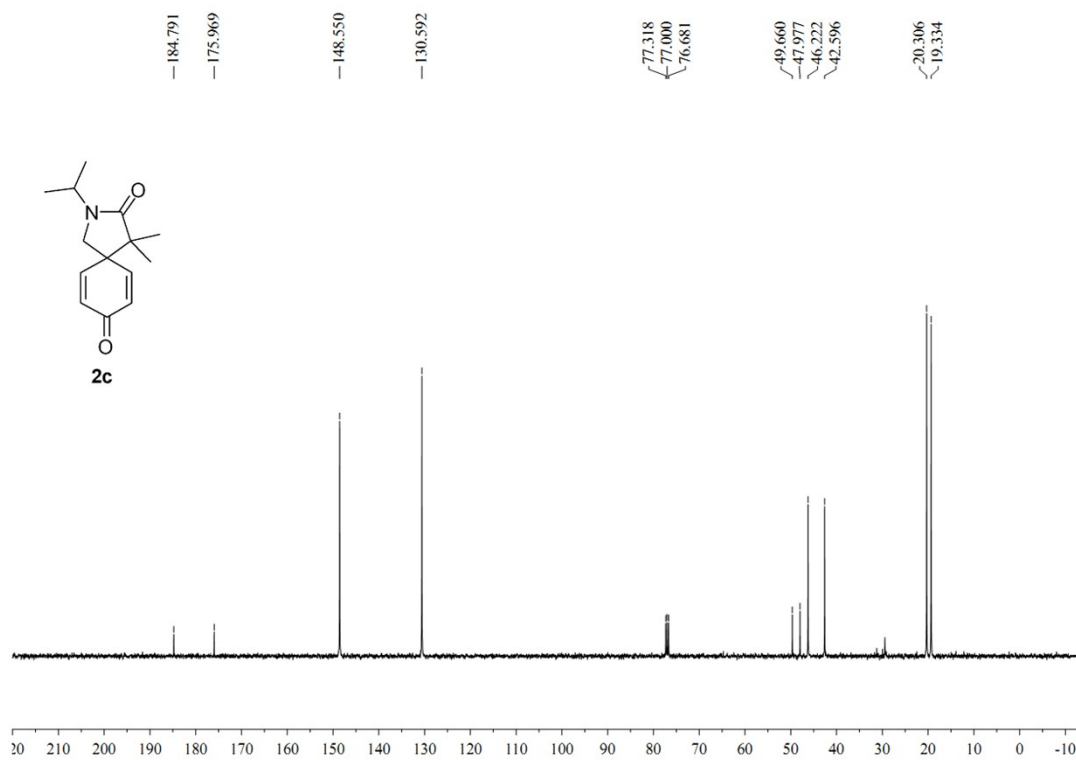

### 2-Butyl-4,4-dimethyl-2-azaspiro[4.5]deca-6,9-diene-3,8-dione (2d)

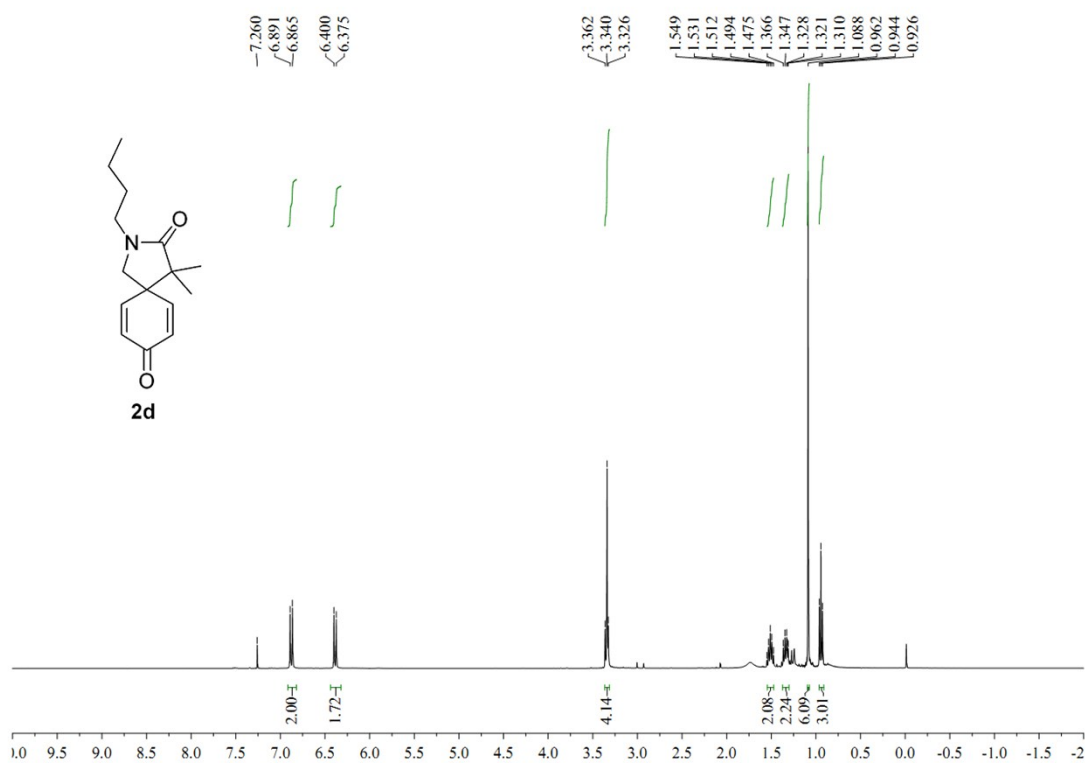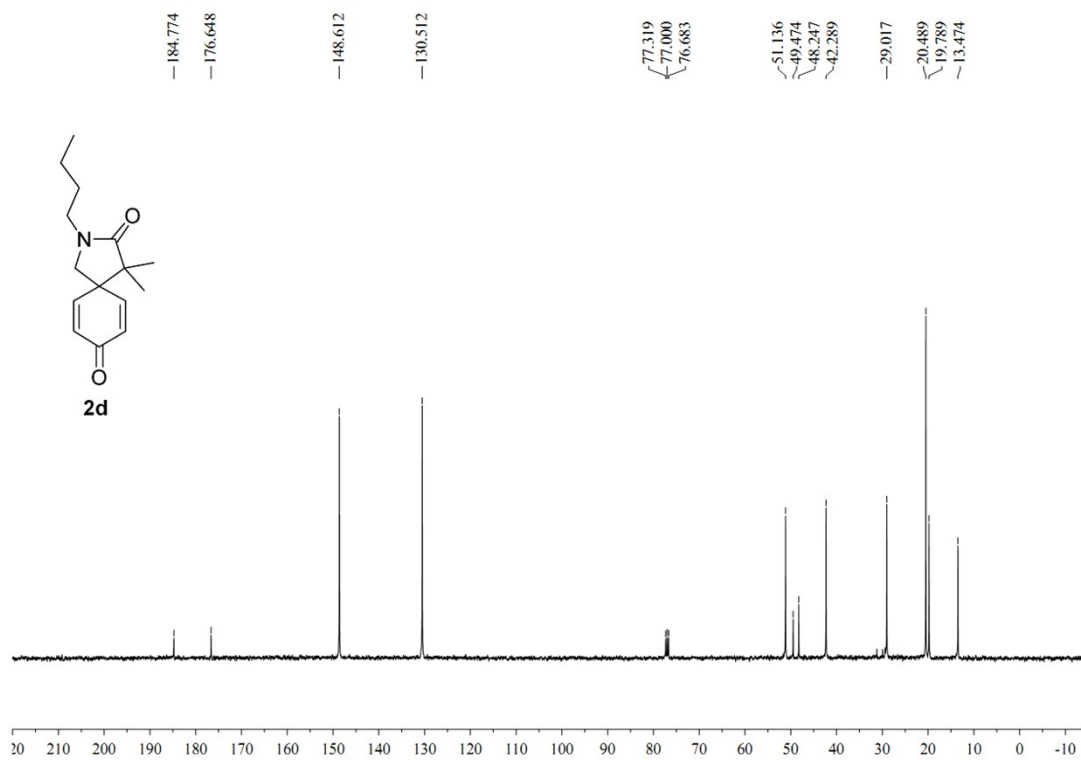

## 2-Cyclohexyl-4,4-dimethyl-2-azaspiro[4.5]deca-6,9-diene-3,8-dione (2e)

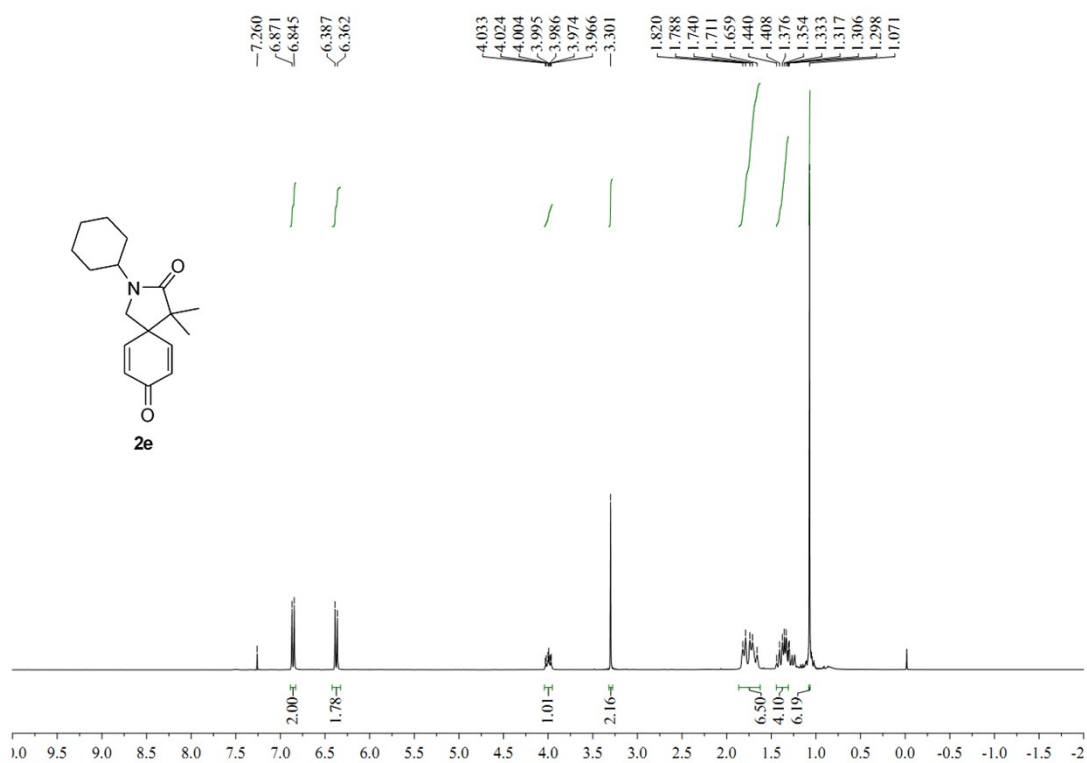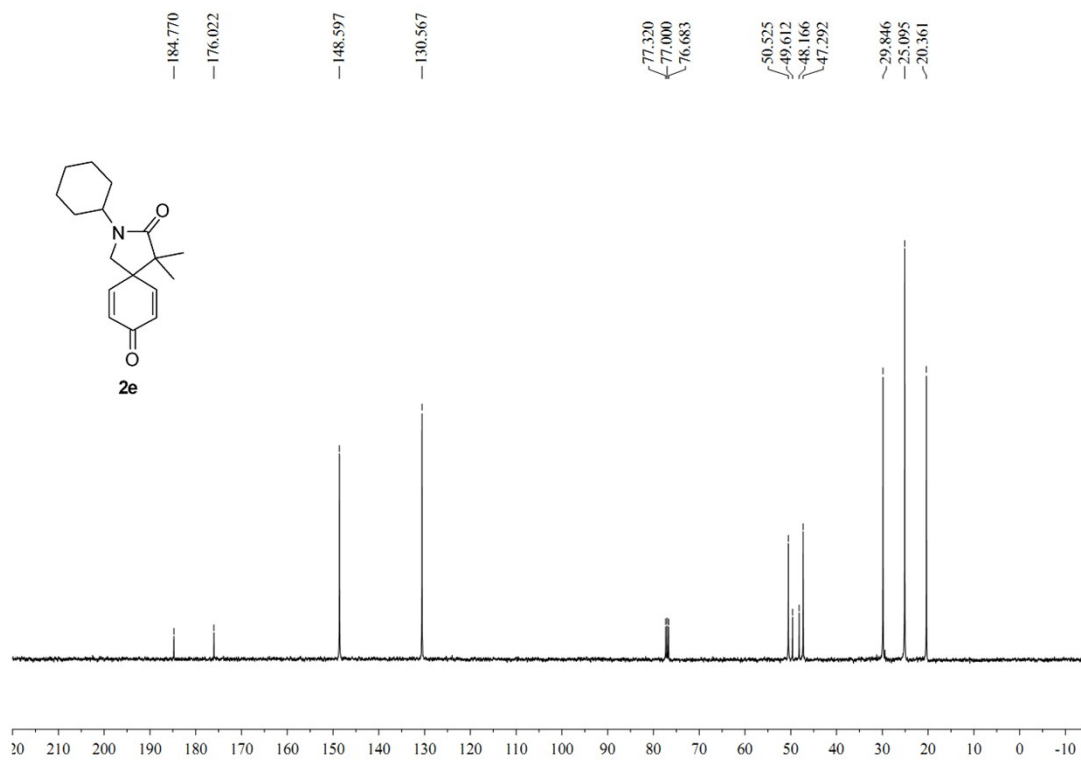

**4,4-Dimethyl-2-phenyl-2-azaspiro[4.5]deca-6,9-diene-3,8-dione (2g)**

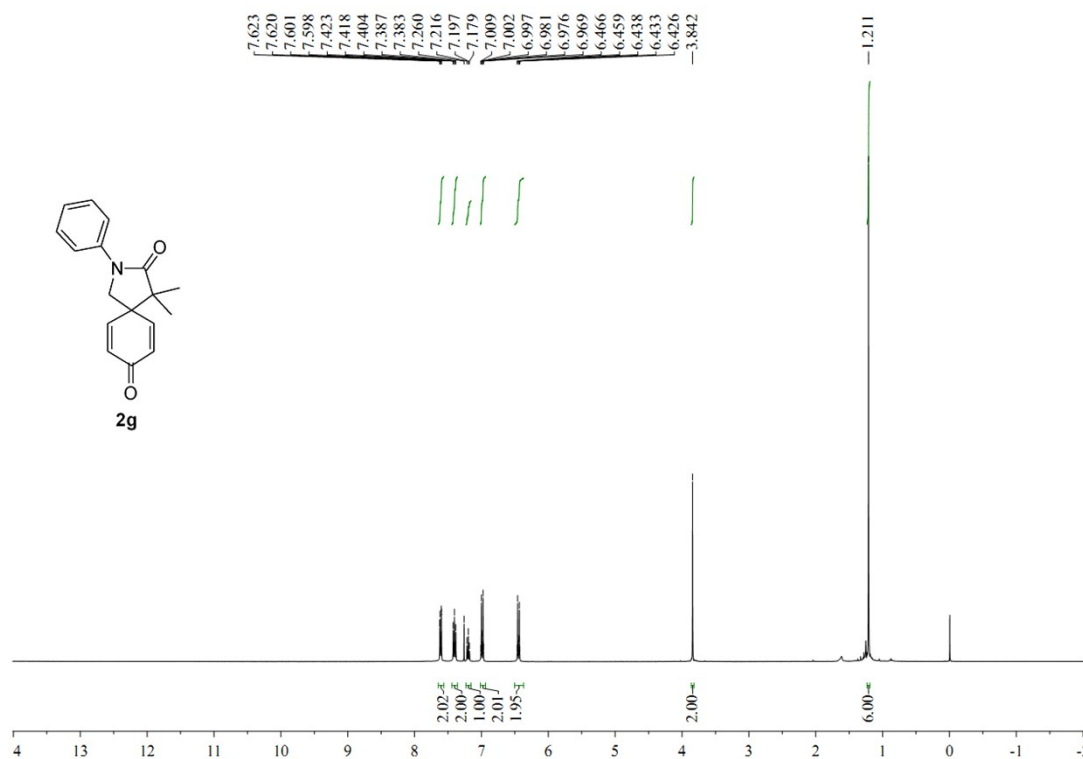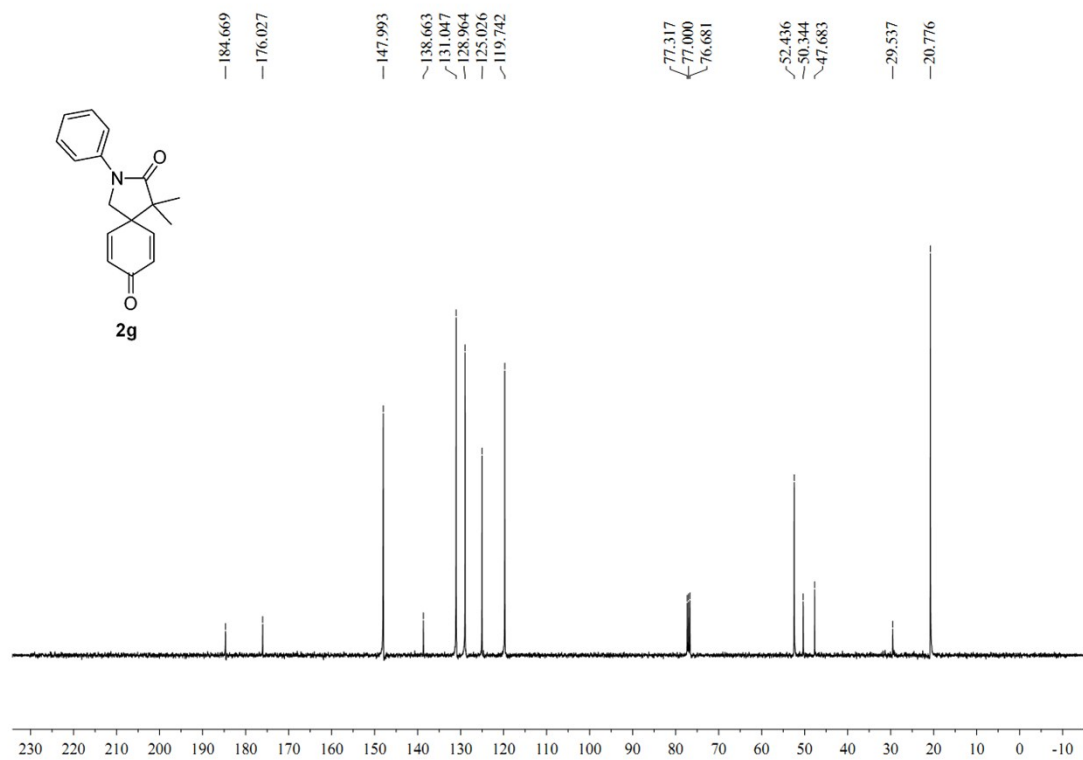

### 1-(4-Methoxybenzyl)-3,3-dimethylindolin-2-one (2g')

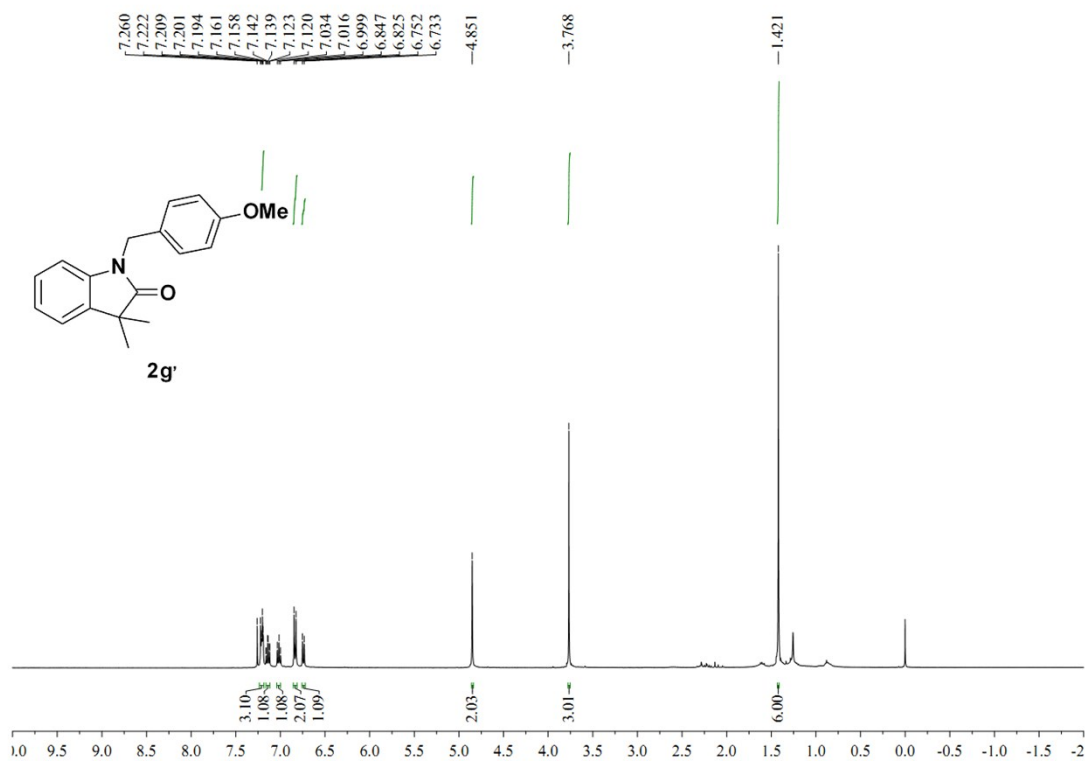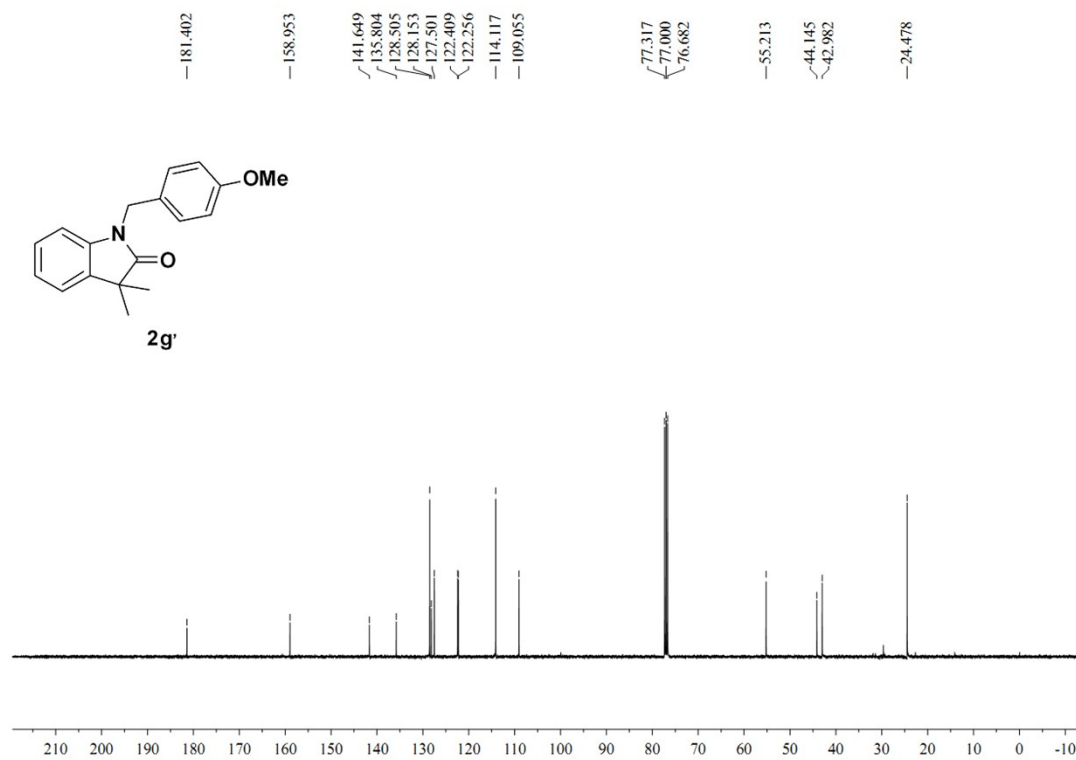



**2-Benzyl-4,4-dimethyl-2-azaspiro[4.5]deca-6,9-diene-3,8-dione (2h)**

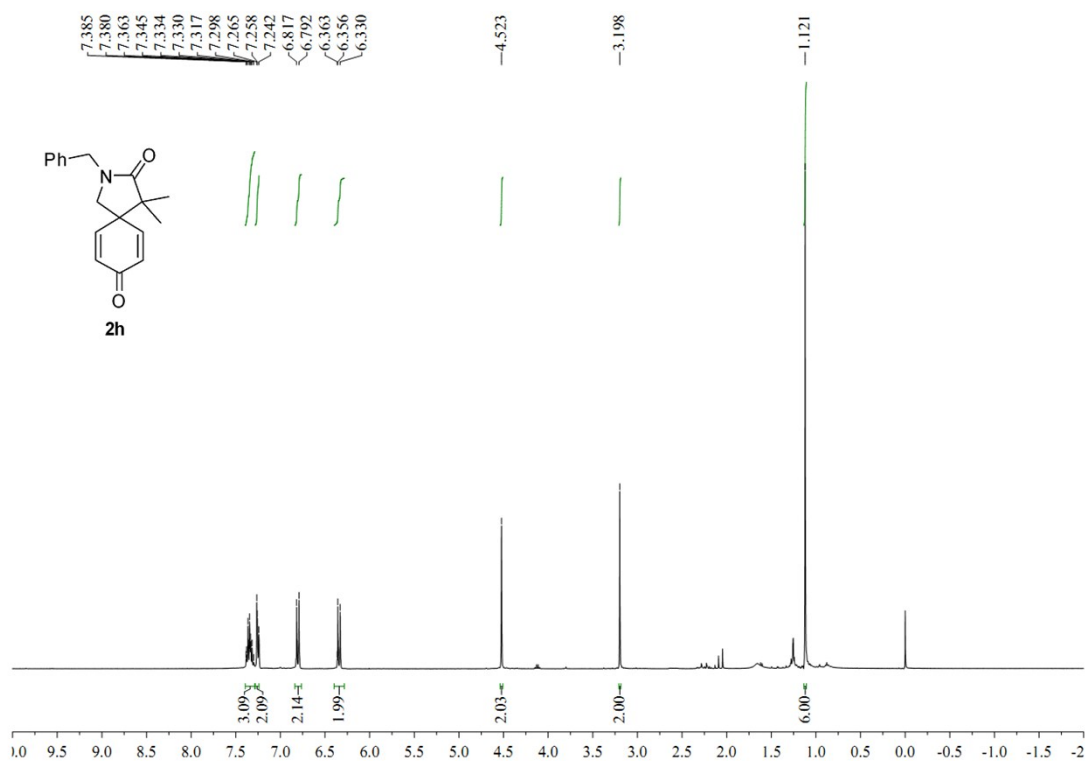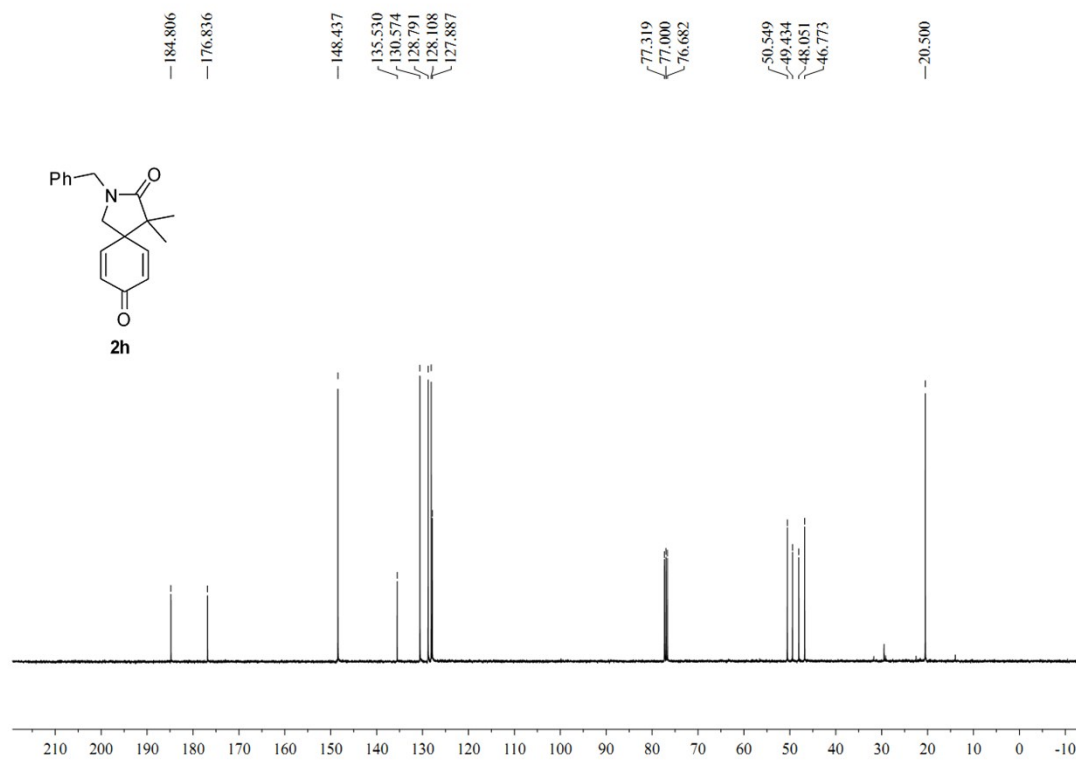

### Methyl 2-(4,4-dimethyl-3,8-dioxo-2-azaspiro[4.5]deca-6,9-dien-2-yl)acetate (2i)

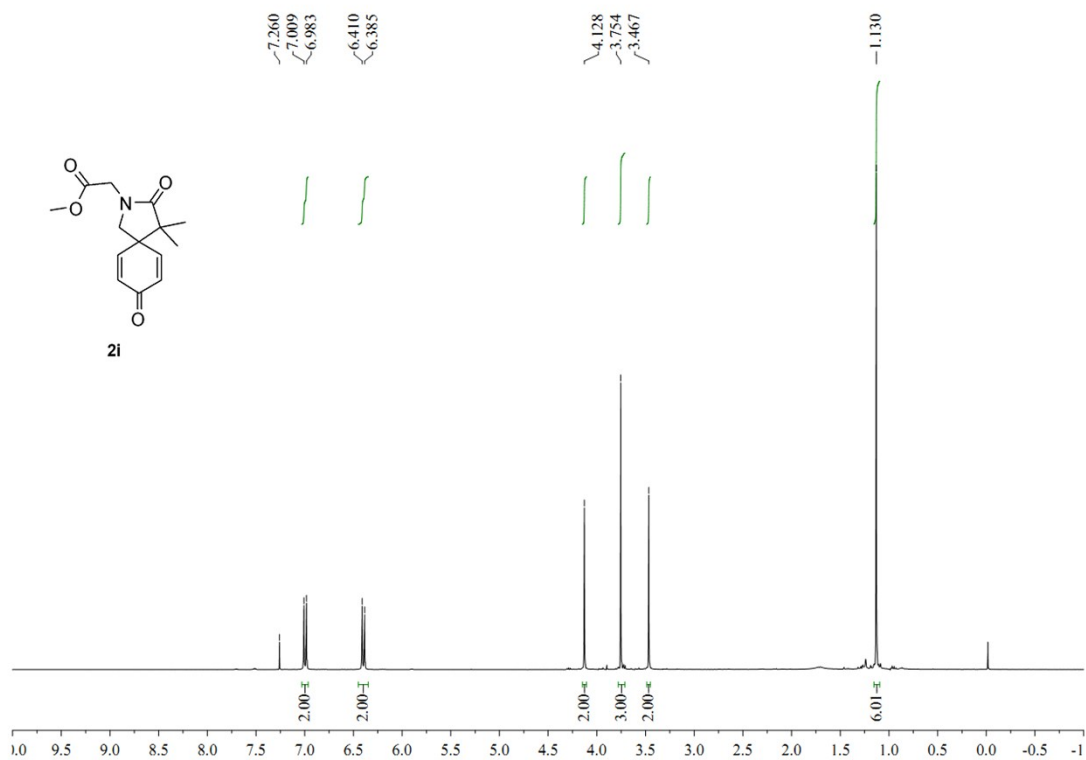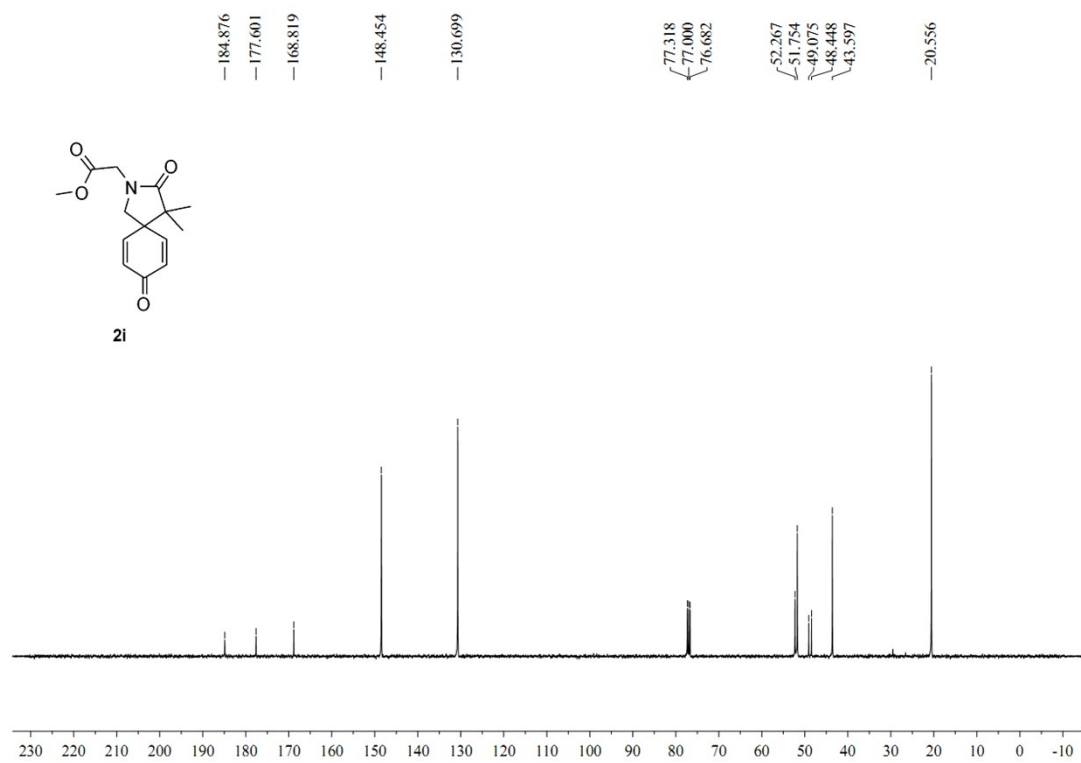

**1-(4-Methoxybenzyl)-3,3-dimethylpiperidin-2-one (2j')**

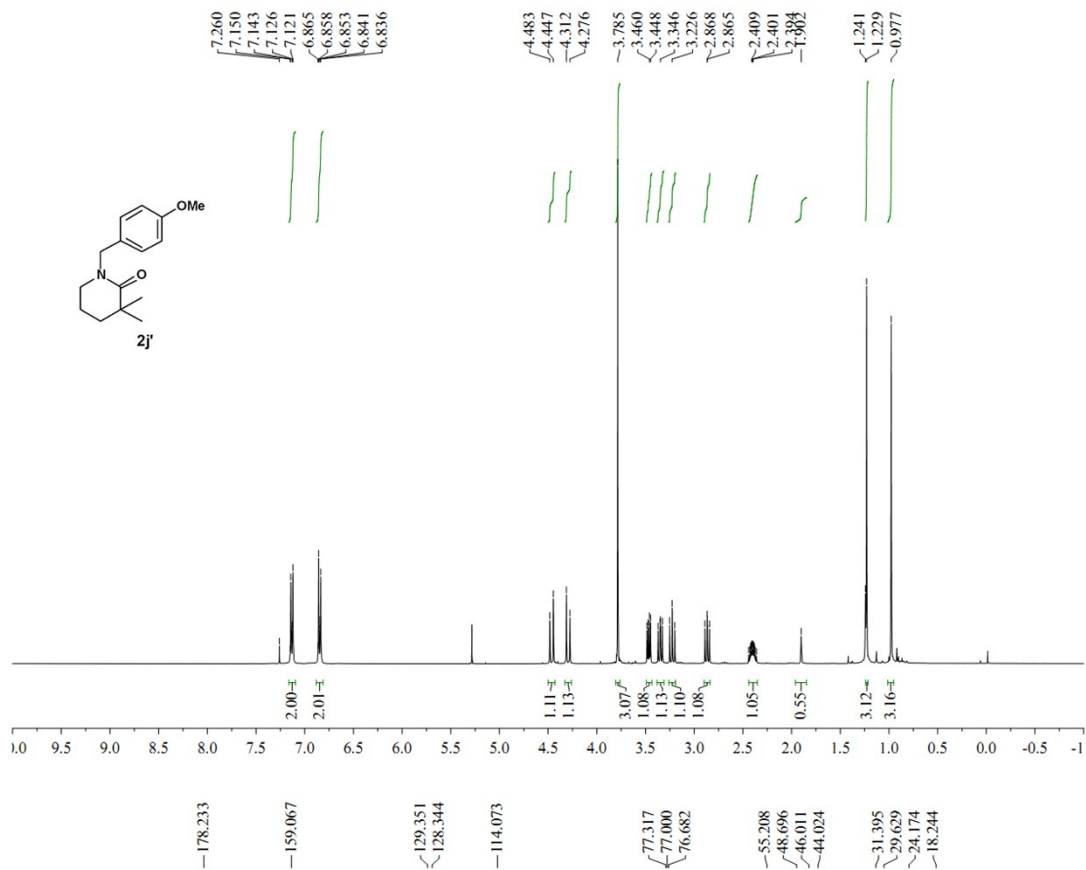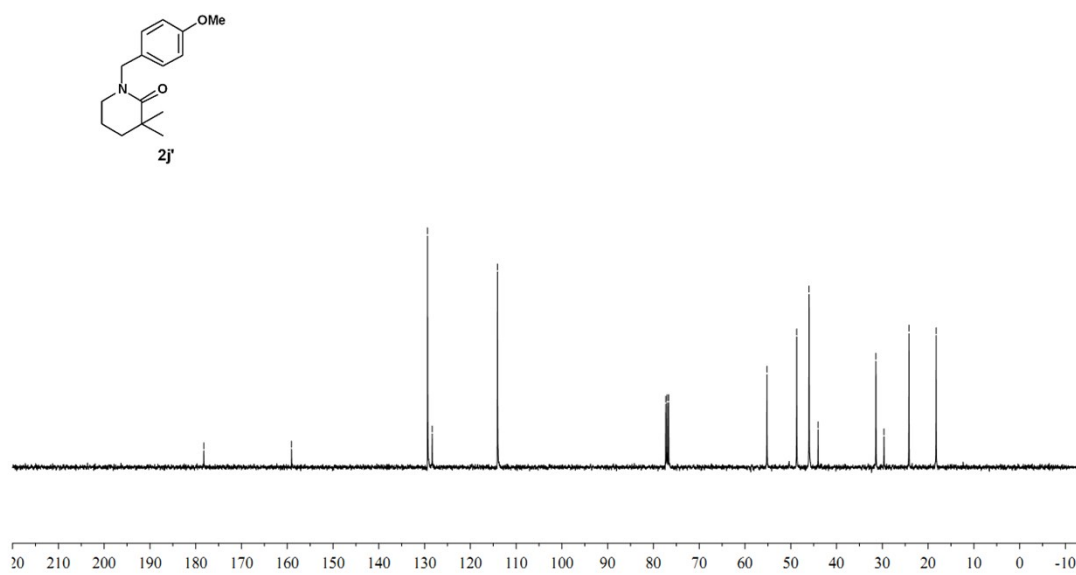

**1-(4-Methoxybenzyl)-3,3,4-trimethylpyrrolidin-2-one (2j'')**

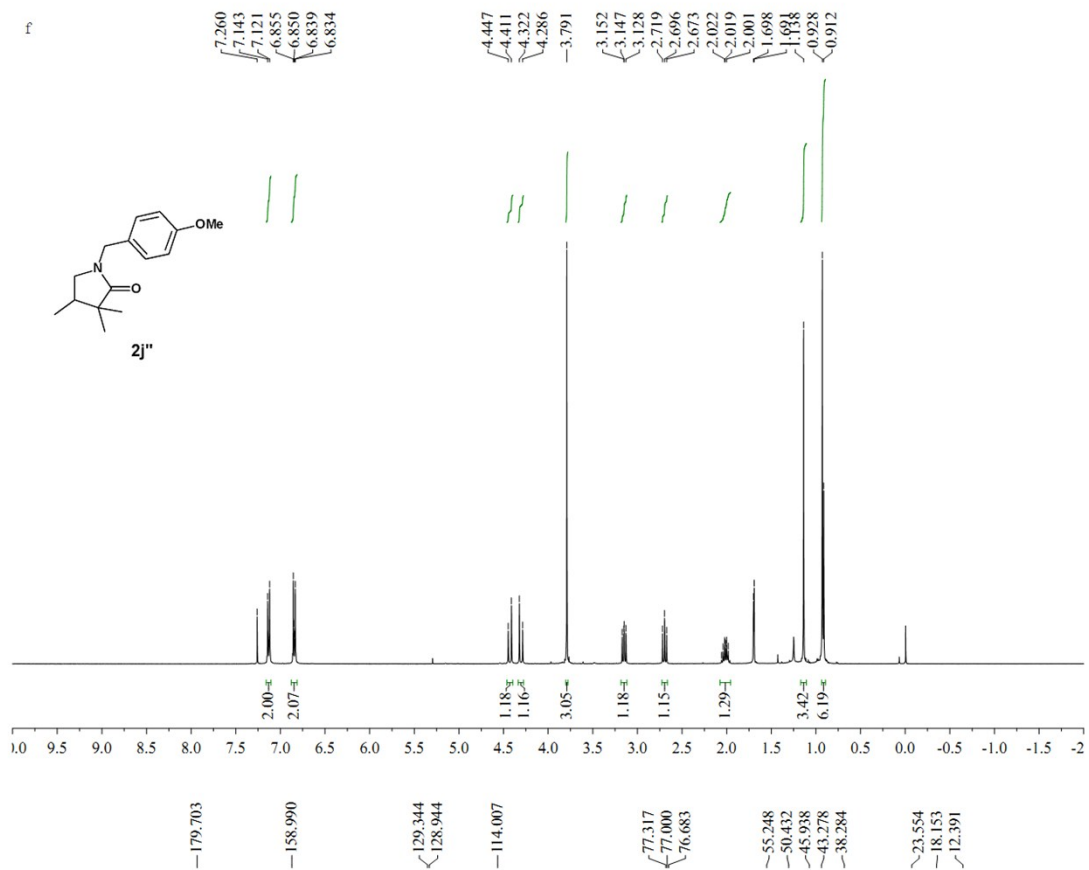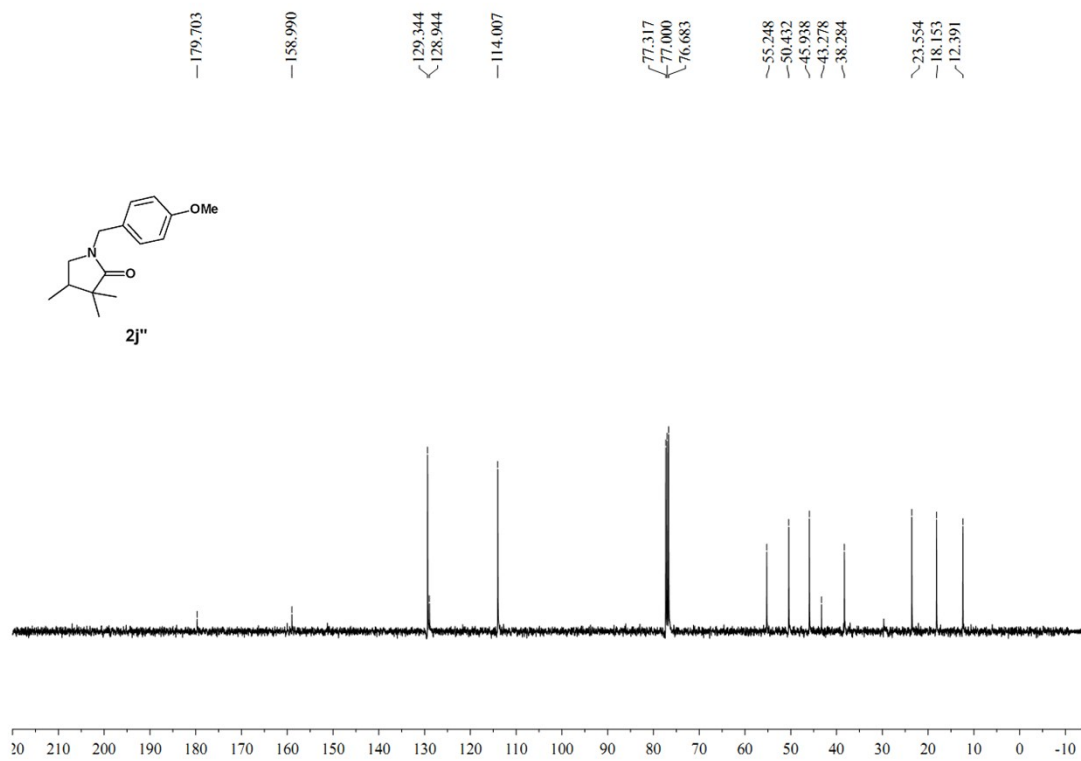

**2-(*tert*-Butyl)-4-methyl-2-azaspiro[4.5]deca-6,9-diene-3,8-dione (2k)**

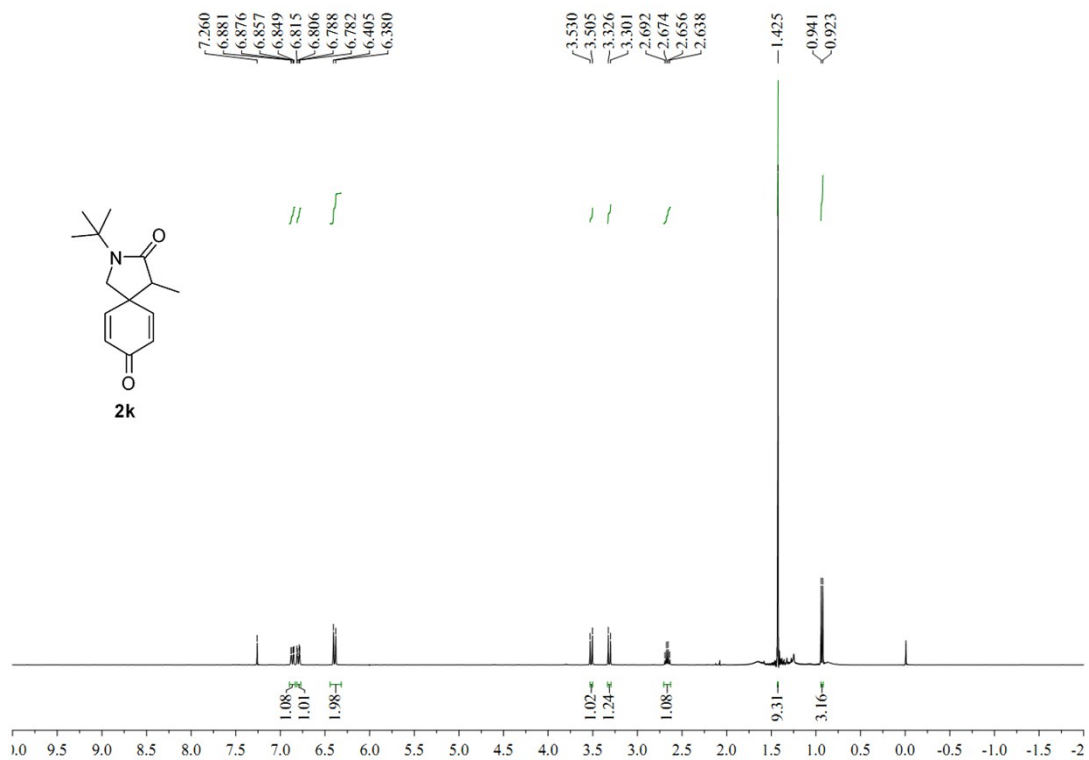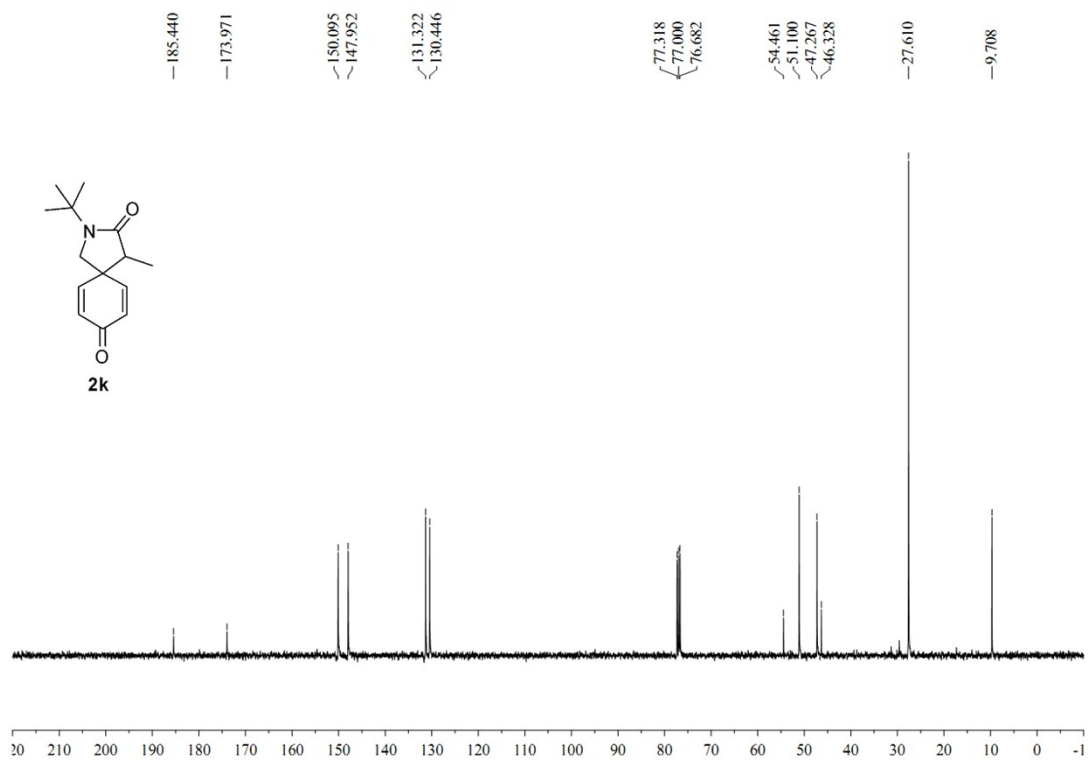

**2-(*tert*-Butyl)-2-azaspiro[4.5]deca-6,9-diene-3,8-dione (21)**

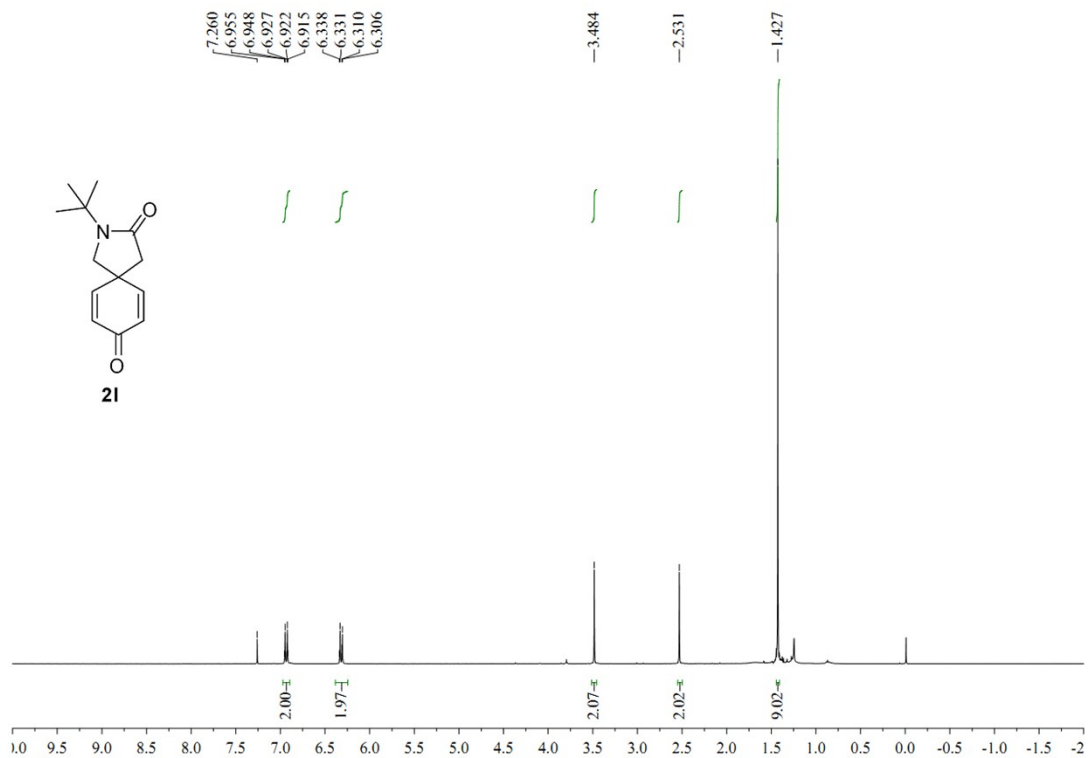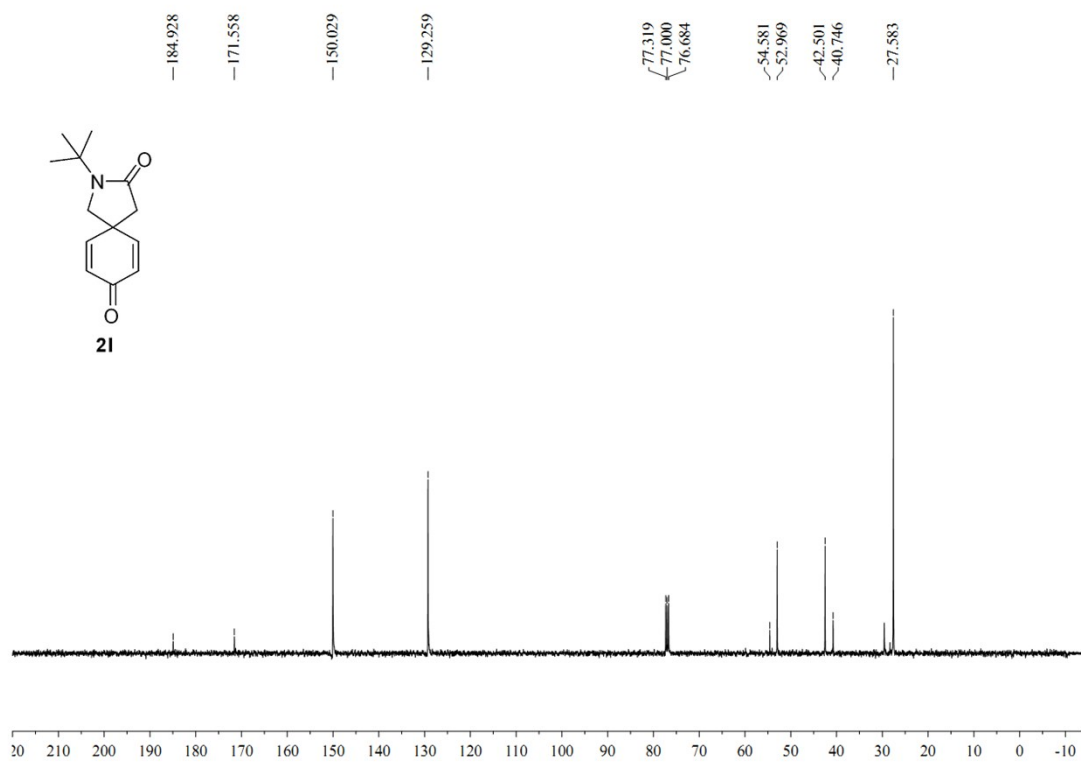

**2-(*tert*-Butyl)-6-methoxy-4,4-dimethyl-2-azaspiro[4.5]deca-6,9-diene-3,8-dione (2q)**

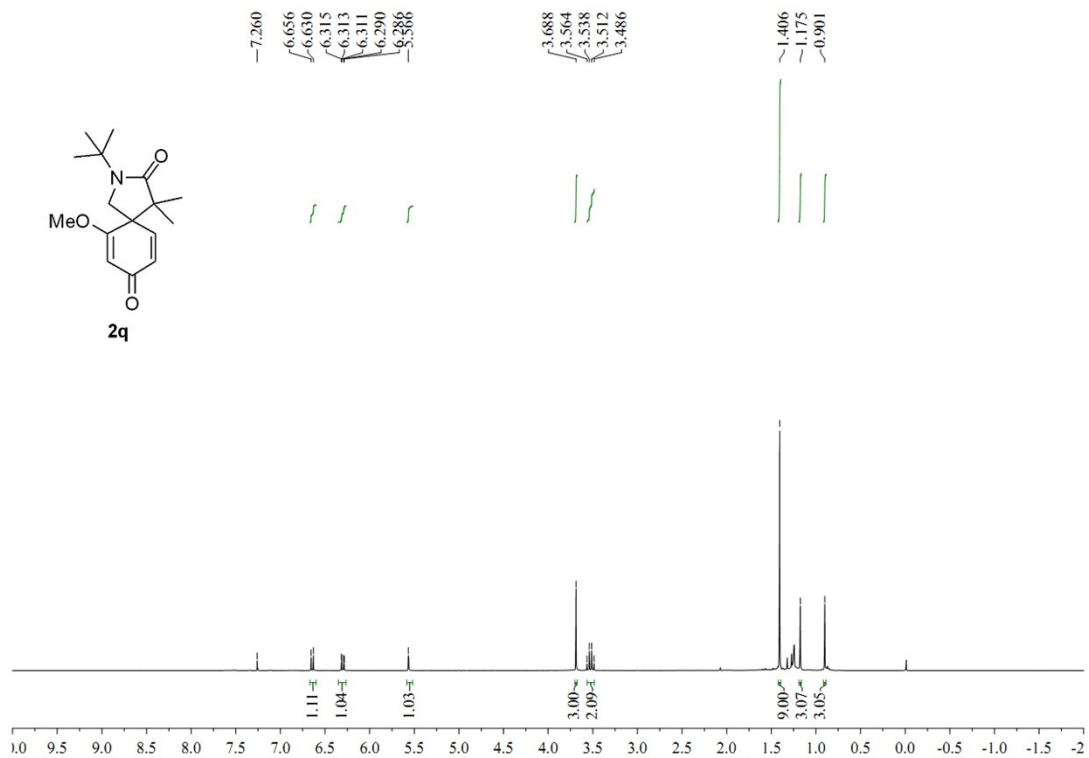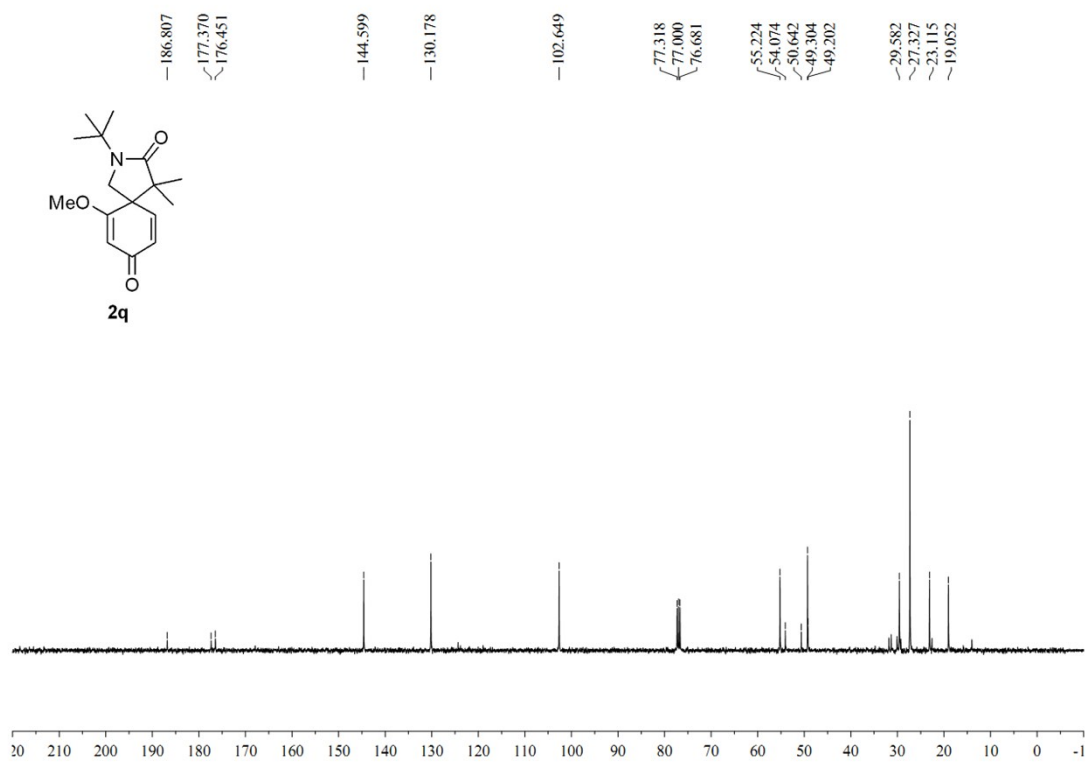

**7-Bromo-2-(*tert*-butyl)-4,4-dimethyl-2-azaspiro[4.5]deca-6,9-diene-3,8-dione (2r)**

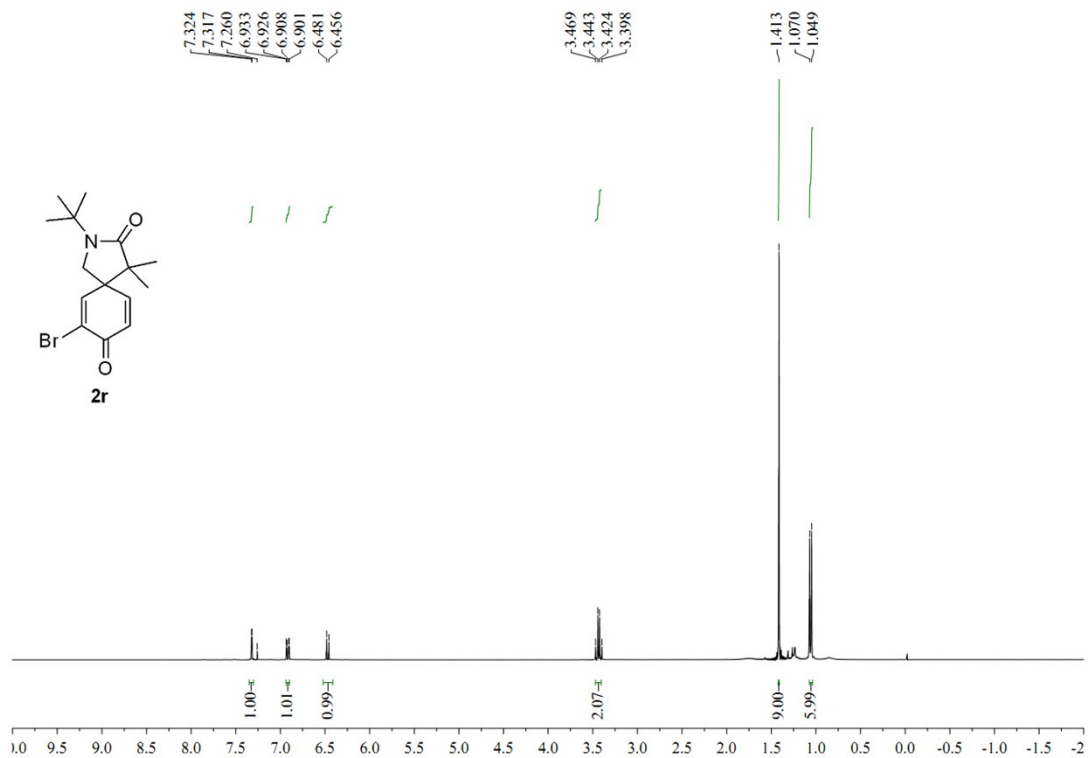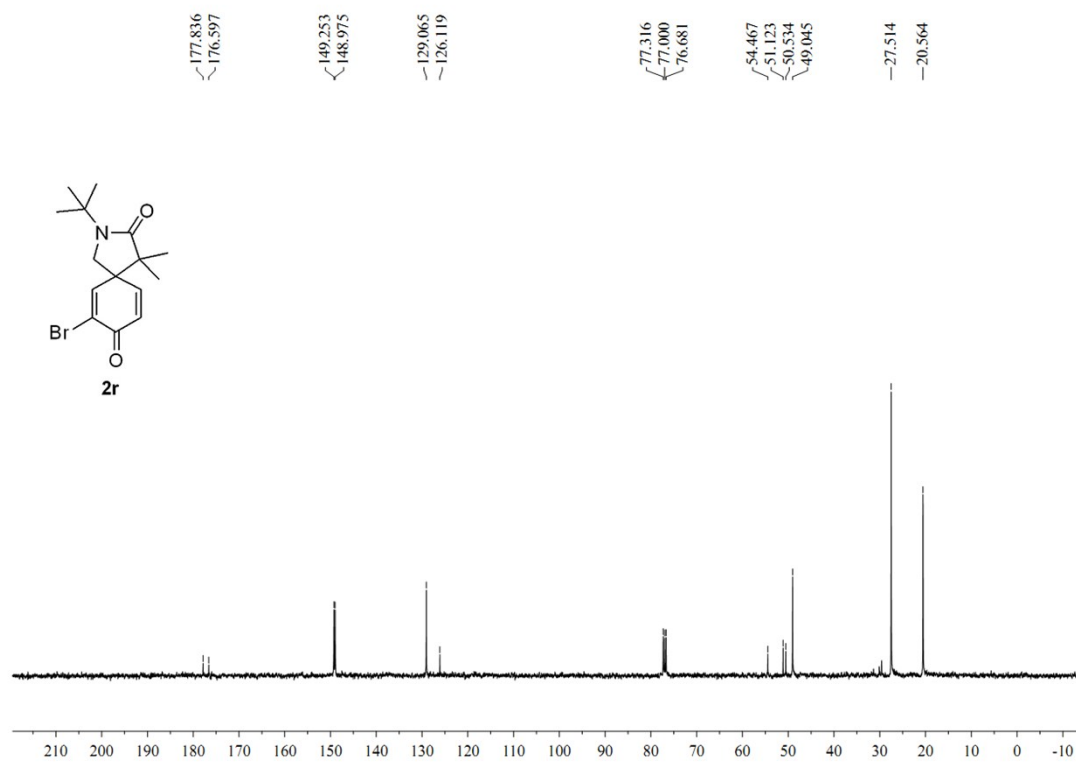



**1'-(*tert*-Butyl)-4',4'-dimethyl-4H-spiro[naphthalene-1,3'-pyrrolidine]-4,5'-dione (2s)**

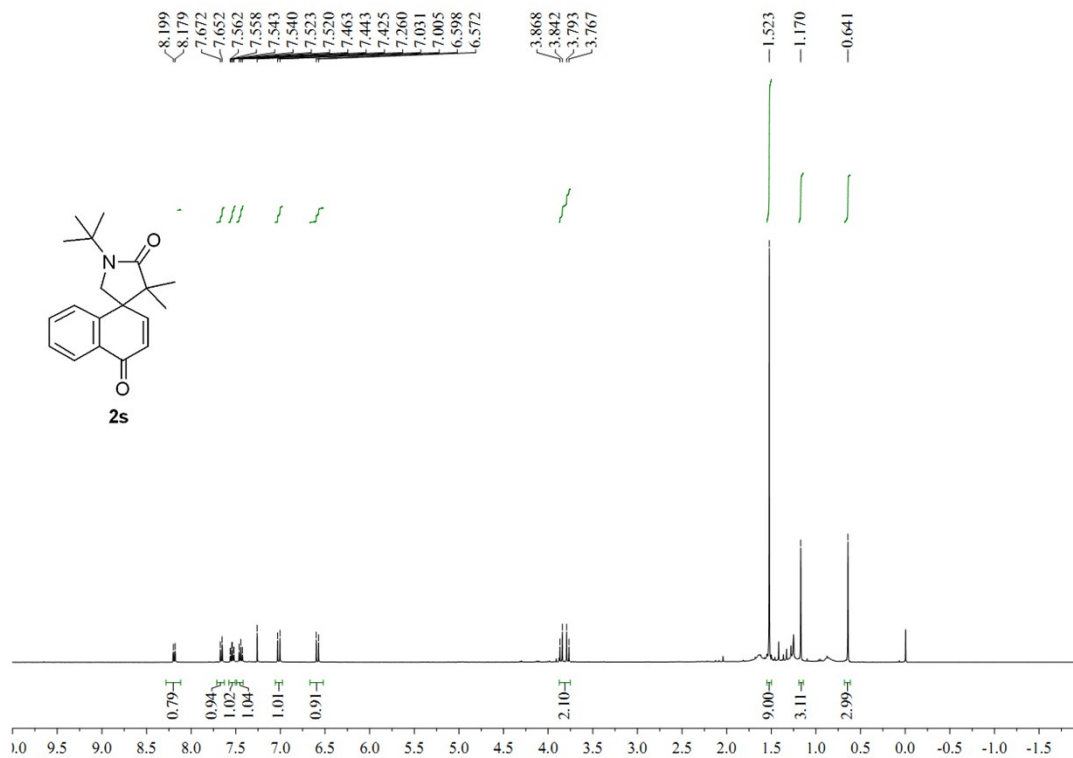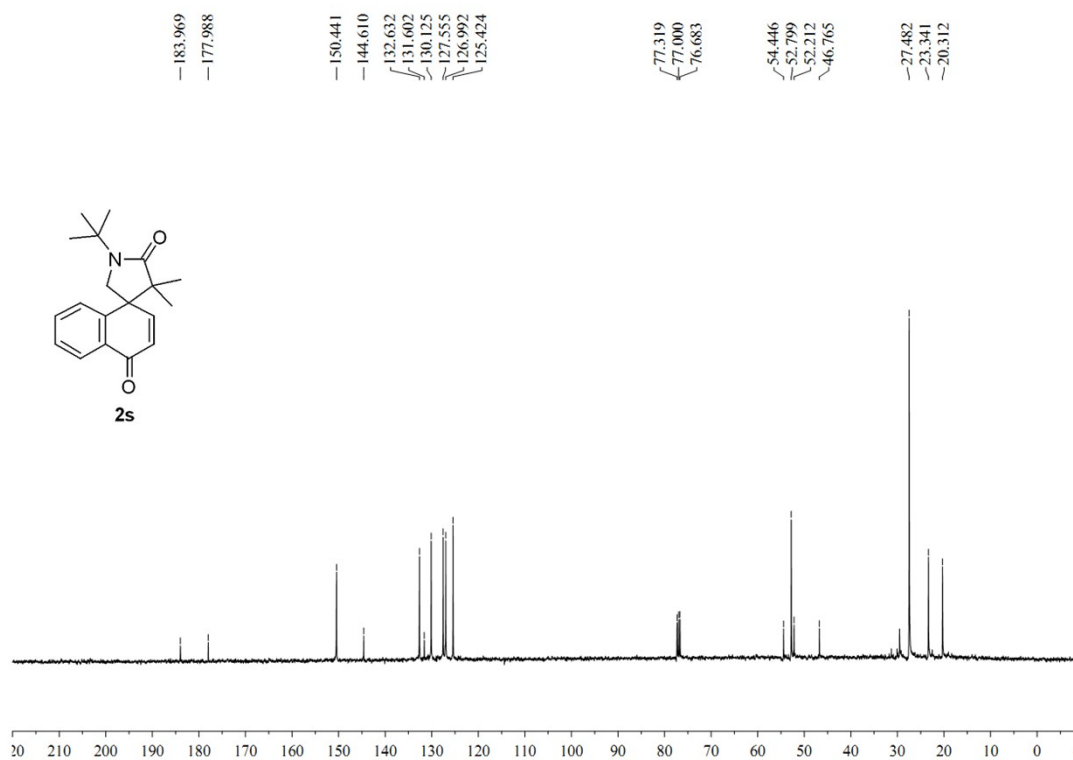

Supplement: c5cc09726f1.pdf [file c5cc09726f1.pdf]
